# Supplementary material
Source: PubMed Central journal article supplement (PMC2915739)
Supplement: supp_M110.134528_jbc.M110.134528-1.pdf [file supp_M110.134528_jbc.M110.134528-1.pdf]

Supplemental data

|                | 20                | 30           | 40            | 50         | 60        |
|----------------|-------------------|--------------|---------------|------------|-----------|
| NP_288269.1    | MNK-----TEFYADLN  | RDFNALMAGETS | -----FLATLANT | SALLYERLTD | -----VNWA |
| YP_002403065.1 | MNK-----TEFYADLN  | RDFNALMAGETS | -----FLATLANT | SALLYERLTD | -----VNWA |
| YP_002397981.1 | MNK-----AEFYADLN  | RDFNALMAGETS | -----FLATLANT | SALLYERLTD | -----VNWA |
| YP_002412850.1 | MNK-----IEFYADLN  | RDFNALMAGETS | -----FLATLANT | SALLYERLTD | -----VNWA |
| YP_001880631.1 | MNK-----TEFYADLN  | RDFNALMAGETS | -----FLATLANT | SALLYERLTD | -----VNWA |
| YP_002391608.1 | MNK-----AEFYADLN  | RDFNALMVGETS | -----FLATLANT | SALLYERLTD | -----VNWA |
| YP_001730808.1 | MNK-----TEFYADLN  | RDFNALMAGETS | -----FLATLANT | SALLYERLTD | -----INWA |
| ZP_03003290.1  | MNK-----TEFYADLN  | RDFNALMAGETS | -----FLATLANT | SALLYERLTD | -----VNWA |
| YP_001743413.1 | MNK-----AEFYADFNR | RDFNALMAGETS | -----FLATLANT | SALLYERLTD | -----VNWA |
| YP_002407226.1 | MNK-----AEFYSDFN  | RDFNALMAGETS | -----FLATLANT | SALLYERLTD | -----VNWA |
| YP_002329476.1 | MNK-----AGFYADLN  | RDFNALMAGETS | -----FLATLANT | SALLYERLTD | -----VNWA |
| YP_002382399.1 | MNK-----TEFYADLN  | RDFRALMAGETS | -----FLATLANT | SALLYERLTD | -----VNWA |
| ZP_03445135.1  | MNK-----TEFYADLN  | RDFNALMAGETS | -----FLATLANT | SALLYERLTD | -----VNWA |
| YP_688895.1    | MNK-----TEFYADLN  | RDFNALMAGETS | -----FLATLANT | SALLYERLTD | -----VNWA |
| YP_669680.1    | MNK-----AEFYADLN  | RDFNALMAGETS | -----FLATLANT | SALLYERLTD | -----VNWA |
| NP_416346.4    | MNK-----TEFYADLN  | RDFNALMAGETS | -----FLATLANT | SALLYERLTD | -----INWA |
| ZP_02903917.1  | MNK-----TEFYADLN  | RDFNALMTGETS | -----FLATLANT | SALLYERLAD | -----VNWA |
| ZP_03282954.1  | MNK-----SEFYADLN  | RDFQALMAGETS | -----FLATLANT | SALLFERLSG | -----VNWA |
| YP_001452718.1 | MSK-----TELYADLN  | RDFQAVMAGETS | -----FLATLANT | SALLFERLSG | -----VNWA |
| YP_001570142.1 | MSE-----TELYAALNR | DFQSLMAGETS  | -----FLATLANT | SALLFERLTE | -----VNWA |
| NP_460803.1    | MSK-----TELYAALNR | DFQSLMAGETS  | -----FLATLANT | SALLFERLTE | -----VNWA |
| YP_150310.1    | MSK-----TELYAALNR | DFQSLMAGETS  | -----FLATLANT | SALLFERLTE | -----VNWA |
| YP_002141797.1 | MSK-----TELYAALNR | DFQSLMAGETS  | -----FLATLANT | SALLFERLTE | -----VNWA |
| YP_002243298.1 | MSK-----TELYAALNR | DFQSLMAGETS  | -----FLATLANT | SALLFERLTE | -----VNWA |
| NP_456352.1    | MSK-----TELYAALNR | DFQSLMAGETS  | -----FLATLANT | SALLFERLTE | -----VNWA |
| NP_804849.1    | MSK-----TELYAALNR | DFQSLMAGETS  | -----FLATLANT | SALLFERLTE | -----VNWA |
| YP_001587603.1 | MSK-----TELYAALNR | DFQSLMAGETS  | -----FLATLANT | SALLFERLTE | -----VNWA |
| ZP_02666379.2  | MSK-----TELYAALNR | DFQSLMAGETS  | -----FLATLANT | SALLFERLTE | -----VNWA |
| ZP_02832604.2  | MSK-----TELYAALNR | DFQSLMAGETS  | -----FLATLANT | SALLFERLTE | -----VNWA |
| YP_001177122.1 | MNK-----TEFYADLN  | RDFQALMTGETS | -----FLATLANT | SALLFERLSD | -----VNWA |
| YP_002226291.1 | MSK-----TELYAALNR | DFQSLMAGETS  | -----FLATLANT | SALLFERLTE | -----VNWA |
| NP_754135.1    | -----             | -----MAGETS  | -----FLXTLANT | SALLYERLTD | -----VNWA |
| ZP_02347214.1  | MSK-----TELYAALNR | DFQSLMAGETS  | -----FLATLANT | SALLFERLTE | -----VNWA |
| ZP_02574893.1  | MSK-----TELYAALNR | DFQSLMAGETS  | -----FLATLANT | SALLFERLTE | -----VNWA |
| ZP_02659310.1  | MSK-----TELYAALNR | DFQSLMAGETS  | -----FLATLANT | SALLFERLTE | -----VNWA |
| ZP_02663512.1  | MSK-----TELYAALNR | DFQSLMAGETS  | -----FLATLANT | SALLFERLTE | -----VNWA |
| ZP_02681881.1  | MSK-----TELYAALNR | DFQSLMAGETS  | -----FLATLANT | SALLFERLTE | -----VNWA |
| ZP_02696584.1  | MSK-----TELYAALNR | DFQSLMAGETS  | -----FLATLANT | SALLFERLTE | -----VNWA |
| YP_002041101.1 | MSK-----TELYAALNR | DFQSLMAGETS  | -----FLATLANT | SALLFERLTE | -----VNWA |
| YP_002045892.1 | MSK-----TELYAALNR | DFQSLMAGETS  | -----FLATLANT | SALLFERLTE | -----VNWA |

Supplemental data

ZP\_03075263.1 MSK-----TEL**YAALNRDFQS****LMAGETS**-----FL**ATLANTSALLFERLTE**-----VN**WA**  
 YP\_002114879.1 MSK-----TEL**YAALNRDFQS****LMAGETS**-----FL**ATLANTSALLFERLTE**-----VN**WA**  
 YP\_002146178.1 MSK-----TEL**YAALNRDFQS****LMAGETS**-----FL**ATLANTSALLFERLTE**-----VN**WA**  
 ZP\_03165709.1 MSK-----TEL**YAALNRDFQS****LMAGETS**-----FL**ATLANTSALLFERLTE**-----VN**WA**  
 YP\_002215294.1 MSK-----TEL**YAALNRDFQS****LMAGETS**-----FL**ATLANTSALLFERLTE**-----VN**WA**  
 ZP\_03221812.1 MSK-----TEL**YAALNRDFQS****LMAGETS**-----FL**ATLANTSALLFERLTE**-----VN**WA**  
 ZP\_03342093.1 MSK-----TEL**YAALNRDFQS****LMAGETS**-----FL**ATLANTSALLFERLTE**-----VN**WA**  
 ZP\_03347154.1 MSK-----TEL**YAALNRDFQS****LMAGETS**-----FL**ATLANTSALLFERLTE**-----VN**WA**  
 ZP\_03352578.1 MSK-----TEL**YAALNRDFQS****LMAGETS**-----FL**ATLANTSALLFERLTE**-----VN**WA**  
 ZP\_03357060.1 MSK-----TEL**YAALNRDFQS****LMAGETS**-----FL**ATLANTSALLFERLTE**-----VN**WA**  
 ZP\_03371453.1 MSK-----TEL**YAALNRDFQS****LMAGETS**-----FL**ATLANTSALLFERLTE**-----VN**WA**  
 ZP\_03379701.1 MSK-----TEL**YAALNRDFQS****LMAGETS**-----FL**ATLANTSALLFERLTE**-----VN**WA**  
 ZP\_03383790.1 MSK-----TEL**YAALNRDFQS****LMAGETS**-----FL**ATLANTSALLFERLTE**-----VN**WA**  
 ZP\_03412299.1 MSK-----TEL**YAALNRDFQS****LMAGETS**-----FL**ATLANTSALLFERLTE**-----VN**WA**  
 ZP\_03217260.1 MSK-----TEL**YAALNRDFQS****LMAGETS**-----FL**ATLANTSALLFERLTE**-----VN**WA**  
 YP\_002237781.1 MSK-----TEF**YADLNRFQALMAGETS**-----FL**AMIAN**TSALLFERLSE-----VN**WA**  
 YP\_001336004.1 MSK-----TEF**YADLNRFQALMAGETS**-----FL**AMIAN**TSALLFERLSE-----VN**WA**  
 YP\_001437512.1 MNK-----TQF**YAE**LNRFDFHS**LMAGETS**-----FL**ATLANTSALLFERLEG**-----VN**WA**  
 ZP\_03403067.1 -----**MATLANTSALLFERLTE**-----VN**WA**  
 YP\_001907453.1 MTK-----AEF**Y**TDLNRDMN**ALLSGETS**-----FL**AVMSNCSALLYKRLDG**-----VN**WA**  
 YP\_001006127.1 MKK-----AEF**Y**AELKRDL**SALIAGETN**-----FI**ATLANASALLYERLDG**-----LN**WA**  
 NP\_669181.1 MKK-----TEF**Y**AELKRDL**CALVAGETN**-----FI**ATLANASALLYERLDG**-----LN**WA**  
 NP\_993079.1 MKK-----TEF**Y**AELKRDL**CALVAGETN**-----FI**ATLANASALLYERLDG**-----LN**WA**  
 YP\_070893.1 MKK-----TEF**Y**AELKRDL**CALVAGETN**-----FI**ATLANASALLYERLDG**-----LN**WA**  
 YP\_651729.1 MKK-----TEF**Y**AELKRDL**CALVAGETN**-----FI**ATLANASALLYERLDG**-----LN**WA**  
 YP\_647856.1 MKK-----TEF**Y**AELKRDL**CALVAGETN**-----FI**ATLANASALLYERLDG**-----LN**WA**  
 YP\_001163103.1 MKK-----TEF**Y**AELKRDL**CALVAGETN**-----FI**ATLANASALLYERLDG**-----LN**WA**  
 ZP\_01888376.1 MKK-----TEF**Y**AELKRDL**CALVAGETN**-----FI**ATLANASALLYERLDG**-----LN**WA**  
 YP\_001400647.1 MKK-----TEF**Y**AELKRDL**CALVAGETN**-----FI**ATLANASALLYERLDG**-----LN**WA**  
 YP\_001607069.1 MKK-----TEF**Y**AELKRDL**CALVAGETN**-----FI**ATLANASALLYERLDG**-----LN**WA**  
 ZP\_02221459.1 MKK-----TEF**Y**AELKRDL**CALVAGETN**-----FI**ATLANASALLYERLDG**-----LN**WA**  
 ZP\_02227087.1 MKK-----TEF**Y**AELKRDL**CALVAGETN**-----FI**ATLANASALLYERLDG**-----LN**WA**  
 ZP\_02229339.1 MKK-----TEF**Y**AELKRDL**CALVAGETN**-----FI**ATLANASALLYERLDG**-----LN**WA**  
 ZP\_02237158.1 MKK-----TEF**Y**AELKRDL**CALVAGETN**-----FI**ATLANASALLYERLDG**-----LN**WA**  
 ZP\_02307206.1 MKK-----TEF**Y**AELKRDL**CALVAGETN**-----FI**ATLANASALLYERLDG**-----LN**WA**  
 ZP\_02314388.1 MKK-----TEF**Y**AELKRDL**CALVAGETN**-----FI**ATLANASALLYERLDG**-----LN**WA**  
 ZP\_02318544.1 MKK-----TEF**Y**AELKRDL**CALVAGETN**-----FI**ATLANASALLYERLDG**-----LN**WA**  
 YP\_001720525.1 MKK-----TEF**Y**AELKRDL**CALVAGETN**-----FI**ATLANASALLYERLDG**-----LN**WA**  
 YP\_001872871.1 MKK-----TEF**Y**AELKRDL**CALVAGETN**-----FI**ATLANASALLYERLDG**-----LN**WA**  
 YP\_002346706.1 MKK-----TEF**Y**AELKRDL**CALVAGETN**-----FI**ATLANASALLYERLDG**-----LN**WA**  
 YP\_001478346.1 MTK-----EQF**Y**AELKRDL**CALLDGETN**-----FI**AALS**NASALINERLDD-----VN**WV**  
 YP\_454994.1 MKK-----QQF**Y**AELLQDMS**ALLDEETH**-----FI**ALAN**ASALLYERLEG-----VN**WA**

Supplemental data

YP\_001217052.1 EVFIFQMEVIMNLEQYQRLTKQAVALLLEGETN-----LIANLANLSALLNMELTE-----LNWV  
 YP\_002150764.1 MPQ-----LNFYQELTDNLSALLSGEND-----FIASLANTSALIYEKLDK-----INWV  
 YP\_856816.1 IEK-----QAFYRTLNRQQAQALLLEGEPD-----LIANLANLSALLNQELAD-----INWV  
 YP\_001093925.1 MST-----PCYTTLTRQVEALFSGEDN-----LVTAMANFSALLNEHLDD-----INWV  
 YP\_269525.1 MSN-----QAEFYHELLGQTKALINDESD-----IIANMANISALLFERLAD-----VNWV  
 NP\_718189.1 MKP-----QFYESLNRQVLAALLLEGEDD-----LVAAAMNFSALLNDNLTE-----LNWV  
 YP\_001366642.1 MKS-----KFYESLNRQALALLLEGEDD-----LVAAAMNFSALLNDNLTE-----LNWV  
 YP\_001554990.1 MKS-----KFYESLNRQALALLLEGEDD-----LVAAAMNFSALLNDNLTE-----LNWV  
 YP\_737796.1 MKP-----QFYESLNRQALALLLEGEDD-----LVAAAMNFSALLNDNLTE-----LNWV  
 YP\_869415.1 MKP-----QFYESLNRQALALLLEGEDD-----LVAAAMNFSALLNDNLTE-----LNWV  
 NP\_797987.1 -----MNIEQYQRLTKQAVALLIESEPD-----FIANLANLSALLFMELED-----LNWA  
 YP\_001501790.1 MVN-----AFYDTLNRQVLAALLDGEDD-----TIAALANFSALLNDNLTD-----LNWV  
 YP\_927460.1 MKH-----AFYDTLNRQAEALLSGEDD-----LVAAAMNFSALLNEHMDD-----LNWV  
 YP\_001474222.1 MIT-----EFYSSLDQRQAKALLDGEDD-----LIAAMANFSALINDALDD-----LNWV  
 YP\_963195.1 MKS-----QFYESLNRQALALLLEGEDD-----VVAAMANFSALLNDNLTD-----LNWV  
 YP\_001183724.1 MKS-----QFYESLNRQALALLLEGEDD-----VVAAMANFSALLNDNLTD-----LNWV  
 YP\_733804.1 MKP-----QFYESLNRQALALLLEGEDD-----LVAAAMNFSALLNDNLTE-----LNWV  
 YP\_001050811.1 MKS-----KFYESLNRQALALLLEGEDD-----LVAAAMNFSALLNDNLTE-----LNWV  
 YP\_750914.1 MKT-----EFYQTLNRQAQALLLEGEDD-----LIAAMANFSALLNDSLED-----LNWA  
 YP\_002126297.1 MK-----EPQYSQLINQAKSLVSGEHD-----LIANMANISALLFNHLEE-----VNWA  
 YP\_130129.1 -----DEPD-----LIANISNISALLNMELED-----INWV  
 YP\_001445537.1 -----MNIEQYQRLTKQAVALLIESEKD-----YIANLSNISALLFMELN-----LNWA  
 YP\_661562.1 MTL-----KTDLYQEVAQQAQALMAGEKD-----LIANLANLSALMYMRLPE-----LNWA  
 YP\_001674584.1 MVD-----AFYDTLNRQVQALFADEDD-----TIAALANFSALINDSLDD-----LNWV  
 YP\_002417027.1 -----MKIEHYQRLTKQAVALLIESEPD-----LTANLANISSLLFMELDE-----LNWA  
 NP\_934438.1 -----MTIEHYQTLTKQAVALLIESERD-----LIANLSNISALLNMGMSD-----LNWV  
 NP\_761466.1 -----MTIEHYQTLTKQAVALLIESERD-----LIANLSNISALLNMGMSD-----LNWV  
 YP\_001760510.1 MDL-----ECYDSLNRQAQALLSGEDD-----LVAAAMNFSALINDAVEQ-----LNWV  
 YP\_002312133.1 MTA-----SFYDTLNRQVIALLSGEDD-----QIAALANFSALLNDNLTD-----LNWV  
 YP\_562727.1 MKA-----DFYDTLDRQASALLAGEDD-----VIAAMANFSALLNESLED-----LNWV  
 NP\_693123.1 MFEQKNYSG-EKAKDYELLIKQLDALSEGENN-----KIALLSNASALLNQFLTE-----VNWV  
 YP\_001699747.1 MFTQINYEG-SIADQYLTLSKQLDALLTGEEKD-----QIANLSNASALLHQFLTN-----INWV  
 YP\_001343242.1 TIETHS--TGSSEEFYQELNIQLAALLSGERD-----FICNAAQFSAFVMQTVTD-----LNWS  
 YP\_001141806.1 IEK-----QAFYRGLNRQQAQALLLEGEPD-----LIANLANLSALLALELTD-----INWV  
 YP\_204661.1 -----MELKHYARLTQQALGLIEGETD-----YIANLANISALLNMELDD-----INWV  
 YP\_301135.1 MTEVK-----ETNYNLLKQVSSLIEDESN-----LIAILSNVSALLNDSIDQ-----INWV  
 YP\_002156075.1 -----MELKHYARLTQQALGLIEGETD-----YIANLANISALLNMELDD-----INWV  
 NP\_244074.1 MFQPESYQG-TLEEKYSLVTKQLAALLLEGESD-----AIAANLANASALLYHFLEE-----VNWV  
 YP\_001559126.1 MDQIDSMYPENKVMYELLVQLKAMLEGEQD-----VIANLSNVSALLNQALKD-----INWV  
 YP\_080250.1 VEKTEG----SKEKKYELLKQIDALTEGEPD-----MIANTANASALLYQSLED-----VNWA  
 YP\_253122.1 MPLIK-----ETNYNLLTKQLQS LIED EQN-----LIAILSNVSALLNDNLTDQ-----INWV  
 YP\_261333.1 MIDLQS--AGQGLDGYGLLCAQLES LLAD ERD-----FIANAAQFSAFLYSQLED-----LNWA

Supplemental data

YP\_001187407.1 MIDLSQ--TGAGMDGYPLLAQLEALLAGLERD-----FIANAAQFSAFLEFHELAD-----LNWA  
 YP\_001422246.1 VEKQSG---DKEKSYQLLLKQLEAMTEDETD-----AIANYANASALLYHSLHE-----VNWA  
 YP\_001748360.1 MIDLNA--SGAGLDGYDLLAAQVQALFADLERD-----FIANAAQFSAFLYNQVDD-----LNWA  
 YP\_155660.1 -----MSSQLYSDLLAQSRALETEGEPD-----LIANLANISALLYEHIED-----INWL  
 NP\_744032.1 MIDLNA--SGAGLDGYNLLAAQVQALFADLERD-----FIANAAQFSAFLYNQVDD-----LNWA  
 YP\_001269146.1 MIDLNA--SGAGLDGYNLLAAQVQALFADLERD-----FIANAAQFSAFLYNQVDD-----LNWA  
 YP\_236680.1 MIDLQN--TGAGLDGYGLLAAQLEALLADLERD-----FIANAAQFSAFLYTQLDD-----LNWA  
 YP\_001667695.1 MIDINA--SGAGLDGYNLLAAQVQALFADLERD-----FIANAAQFSAFLEFNQVDD-----LNWA  
 YP\_188854.1 MTKNI-----PTNYKLISKQLASLIEDEKN-----LIAILSNTSALLNDTIDQ-----INWV  
 YP\_002275225.1 ---MTTLPADHRVTLEDLLSTVESVLTG-----ERD-----LIANMANISALLFEALPD-----INWA  
 YP\_804779.1 MSE-----PINSIIVEQIDALLFNETN-----LIANLSNASALLYSETKD-----VNCW  
 NP\_470973.1 MIEIQKMTG-TKEENYALALKQVQAMIAGEPN-----LIANLSNVSSILNQALSD-----INWV  
 YP\_607257.1 MIDLNA--SGQGLDGYDLLAAQVQALFADLERD-----FIANAAQFSAFLYNQVDD-----LNWA  
 YP\_001860169.1 MFEATINTALPKAEFYRELT SQARS LLEGESN-----QIANAAANLSALIFHSLPQ-----VNWA  
 NP\_465120.1 MIEIKKMTG-TKEENYALALKQVQAMIHGEPN-----LIANLSNVSSIINQALSD-----INWV  
 NP\_372242.1 MTTIN-----PTNYTLLKKQAASLIEDEHH-----MIAILS NMSALLNDNLNQ-----INWV  
 NP\_374828.1 MTTIN-----PTNYTLLKKQAASLIEDEHH-----MIAILS NMSALLNDNLNQ-----INWV  
 YP\_001247140.1 MTTIN-----PTNYTLLKKQAASLIEDEHH-----MIAILS NMSALLNDNLNQ-----INWV  
 YP\_001316940.1 MTTIN-----PTNYTLLKKQAASLIEDEHH-----MIAILS NMSALLNDNLNQ-----INWV  
 YP\_001442294.1 MTTIN-----PTNYTLLKKQAASLIEDEHH-----MIAILS NMSALLNDNLNQ-----INWV  
 YP\_002314836.1 MFHTQTYTG-TREENYTLVIEQLKALISDEKS-----VVANLANASALLNYFLHD-----INWV  
 YP\_001814701.1 MFETTTYDG-DRTKQYEMLNKQLDALLTGETN-----QIANLSNASALLGQFLDR-----TNWV  
 NP\_646478.1 MTTIN-----PTNYTLLKKQAASLIEDEHH-----MIAILS NMSALLNDNLDQ-----INWV  
 YP\_043764.1 MTTIN-----PTNYTLLKKQAASLIEDEHH-----MIAILS NMSALLNDNLDQ-----INWV  
 YP\_186602.1 MTTIN-----PTNYTLLKKQAASLIEDEHH-----MIAILS NMSALLNDNLDQ-----INWV  
 YP\_494359.1 MTTIN-----PTNYTLLKKQAASLIEDEHH-----MIAILS NMSALLNDNLDQ-----INWV  
 YP\_500333.1 MTTIN-----PTNYTLLKKQAASLIEDEHH-----MIAILS NMSALLNDNLDQ-----INWV  
 YP\_001332646.1 MTTIN-----PTNYTLLKKQAASLIEDEHH-----MIAILS NMSALLNDNLDQ-----INWV  
 YP\_001575592.1 MTTIN-----PTNYTLLKKQAASLIEDEHH-----MIAILS NMSALLNDNLDQ-----INWV  
 ZP\_02759966.1 MTTIN-----PTNYTLLKKQAASLIEDEHH-----MIAILS NMSALLNDNLDQ-----INWV  
 YP\_001487827.1 VEKQAG---DPSKDYQLLVKQVEAITDGE PD-----LIANLANAAALLYHSLPE-----VNWA  
 YP\_417047.1 MTTIN-----PTNYTLLKKQAASLIEDEHH-----MIAILS NMSAILNDNLDQ-----VNWV  
 YP\_041183.1 MTTIN-----PTNYTLLKKQAASLIEDEHH-----MIAILS NMSALLNDNLDQ-----INWV  
 YP\_176251.1 MFSKLDYPT-EQEAAYRLLEQQAVALLLED EPD-----ALANYANL CALLGQFLDD-----INWV  
 YP\_002349929.1 MIEIQKMTG-SKEENYGLALKQVQAMIHC EPN-----LIANLSNVSSILNQALSD-----INWV  
 YP\_001376537.1 MFTKESYVG-SREKQYETVIKQLDALLTGESN-----TVANLANASALLNQFLER-----INWV  
 YP\_784647.1 MFQASTLSTDFKQFYQELAAQARALLDGEHD-----RIANAANFAALI WQSVPD-----INWS  
 YP\_557760.1 MFEVSTASHLPKAAHYEELVAQARSLLAGETD-----WIANAANFSAFVFHSLSD-----LNWA  
 YP\_275769.1 MIDLQN--TGAGLNGYGLLAAQLEALLADLERD-----SIANAAQFSAFLYTQIDD-----LNWA  
 YP\_001118914.1 MFTLSTDPHASKAELYATLAEQARS LVESEPD-----LIANAANFSALVYHSLDR-----LNWA  
 YP\_001782545.1 MFALEDFKGLTEEQKYENMLLFLKGQLLG EKD-----VIANLSNASAIMALIDN-----LNWA  
 NP\_882192.1 MFDATPISTVSKPVFYAELAAQARALLAG EHD-----RIANAANFSALVYQALPD-----INWA

Supplemental data

YP\_001894915.1 MFEVSSASHLPKAAHYEELVAQARSLLAGETD-----WIANAANFSAFVFHSLSD-----LNWA  
 YP\_001647268.1 MFTKESYAG-SREEQYKTVIKQLDALLTGEPN-----VVANLSNASALLNQFLDR-----VNWV  
 NP\_882465.1 MFDATPISTVSKPVFYAELAAQARALLAGEHD-----RIANAANFSALVYQALPD-----INWA  
 YP\_002448219.1 MFTKESYAG-SRVQQYETVIKQLDALLTGESN-----VVANLSNASALLNQFLDR-----VNWV  
 NP\_834359.1 MFTKESYAG-SRVQQYETVIKQLDALLTGESN-----VVANLSNASALLNQFLDR-----VNWV  
 YP\_002369448.1 MFTKESYAG-SRVQQYETVIKQLDALLTGESN-----VVANLSNASALLNQFLDR-----VNWV  
 YP\_191278.1 ----MS--APIHRLSVDELVPMVRSVLQT-----ETD-----MIANMANIAALLFETLPQ-----INWA  
 NP\_886654.1 MFDATPISTVSKPVFYAELAAQARALLAGEHD-----RIANAANFSALVYQALPD-----INWA  
 NP\_847103.1 MFTKESYAG-SRVQQYETVIKQLDALLTGESN-----IVANLSNASALLNQFLDR-----VNWV  
 YP\_030799.1 MFTKESYAG-SRVQQYETVIKQLDALLTGESN-----IVANLSNASALLNQFLDR-----VNWV  
 NP\_981083.1 MFTKESYAG-SRVQQYETVIKQLDALLTGESN-----VVANLSNASALLNQFLDR-----VNWV  
 YP\_038702.1 MFTKESYAG-SRVQQYETVIKQLDALLTGESN-----VVANLSNASALLNQFLDR-----VNWV  
 YP\_002340711.1 MFTKESYTG-SRVQQYETVIKQLDALLTGESN-----VVANLSNASALLNQFLDR-----VNWV  
 YP\_085975.1 MFTKESYAG-SRVQQYETVIKQLDALLTGESN-----VVANLSNASALLNQFLDR-----VNWV  
 YP\_002453717.1 MFTKESYAG-SRVQQYETVIKQLDALLTGESN-----VVANLSNASALLNQFLDR-----VNWV  
 YP\_772921.1 MFTLSNDPHASKAELYATLVEQARALVESERD-----LIANAANFSALVYHSLDR-----LNWA  
 YP\_001843726.1 KMMSK-----QADYQLLYQQALALFEGETD-----WIANASNLAALLYNGLAD-----VNFA  
 YP\_942902.1 -----MTFKDYKLLSQQAVALLIADETD-----LTANLANLSALLNMNLDN-----INWV  
 YP\_121651.1 SFTVAE-PTGDRVEDYRRLVAQAAALIEGEPD-----RVANAANLSALIYHSLPE-----VNWA  
 YP\_001633478.1 MFTATDLPTDDKPRFYAELAAQARALLDGETD-----RIANAANFAALAYQALPR-----INWA  
 YP\_001392189.1 MFALEDFKGLTEEQKYENMLLFLKGQLLGEKD-----VIANLSNASAIMALIDN-----LNWA  
 YP\_795394.1 MSE-----SLNPIITKQLDALLYGETN-----LVANLSNAAALLNQTLSD-----INWA  
 YP\_002284153.1 MYATKNIEQGDKRSFYRELADQLQGLLQDERD-----AVANAANLSALVFELVAD-----LNWA  
 YP\_001255404.1 MFALEDFKELTEEQKYENMLLFLKGQLLGEKD-----VIANLSNASAIMALIDN-----LNWA  
 YP\_001385170.1 MFALEDFKELTEEQKYENMLLFLKGQLLGEKD-----VIANLSNASAIMALIDN-----LNWA  
 YP\_001388639.1 MFALEDFKELTEEQKYENMLLFLKGQLLGEKD-----VIANLSNASAIMALIDN-----LNWA  
 YP\_001347703.1 MIDLQQ--TGAGLDGYALLAAQAEALFADERD-----FIANAAQFSAFLFHELDD-----LNWA  
 NP\_103622.1 MFAAKAIDTSDKAIFYSDLAAQLKALLDGESESD-----SIANAANTAALIFQMVPD-----LNWA  
 YP\_001807739.1 MFTLSNDPHASKAELYATLVEQARALVESERD-----LTANAANFSALVYHSLDR-----LNWA  
 YP\_001580337.1 MFTLSHDPDASKADQYATLVEQARALVESERD-----LIANAANFSALVYHSLDR-----LNWA  
 YP\_002230176.1 MFTLSNDPTASKADQYATLVEQARALVESERD-----LTANAANFSALVYHSLDR-----LNWA  
 NP\_251512.1 MIDLQQ--SGAGLAGYALLAAQAEALFADERD-----FIANAAQFSAFLFHELGD-----LNWA  
 YP\_459505.1 MFDFAPDETLPAEERYRQLVDAADALTAGEGD-----GVANMANLAALMWEFIPD-----LNWA  
 YP\_790351.1 MIDLQQ--SGAGLAGYALLAAQAEALFADERD-----FIANAAQFSAFLFHELGD-----LNWA  
 YP\_002439846.1 MIDLQQ--SGAGLAGYALLAAQAEALFADERD-----FIANAAQFSAFLFHELGD-----LNWA  
 YP\_001970489.1 MFANAS-LTGSKPEQYAQLLEQARGLVYAESD-----RIANAANLSALVYHALPD-----LNWV  
 YP\_617023.1 MSYTLSFTATEAAERWAEAGEAAAA LVAGEHD-----GIANMANVAALIWQAIPD-----LNWA  
 YP\_620554.1 MFTLSNDPTASKADQYATLVEQARALVESERD-----LTANAANFSALVYHSLDR-----LNWA  
 YP\_834795.1 MFTLSNDPTASKADQYATLVEQARALVESERD-----LTANAANFSALVYHSLDR-----LNWA  
 YP\_148653.1 MFRPMAYNG-TREENYALVIEQLKSLISGEPN-----FIANLANAAALLNQFFTD-----INWV  
 YP\_442277.1 MFALSEALPSSKPALYETLAAQARALVETETD-----IVANAANFASLVYHSLDG-----LNWA  
 YP\_334263.1 MFALSEALPSSKPALYETLAAQARALVETETD-----IVANAANFASLVYHSLDG-----LNWA

Supplemental data

YP\_001067073.1 MFALSEALPSSKPALYETLAAQARALVETETD-----IVANAANFASLVYHSLDG-----LNWA  
 YP\_368503.1 MFTLSNDPNASKADQYATLVEQARALVESERD-----LTANAANFSALVYHSLDR-----LNWA  
 YP\_109010.1 MFALSEALPSSKPALYETLAAQARALVETETD-----IVANAANFASLVYHSLDG-----LNWA  
 YP\_993758.1 MFALSEALPSSKPALYETLAAQARALVETETD-----IVANAANFASLVYHSLDG-----LNWA  
 YP\_001028775.1 MFALSEALPSSKPALYETLAAQARALVETETD-----IVANAANFASLVYHSLDG-----LNWA  
 YP\_002026852.1 MFANAS-LTGSKPEQYAQLLEQARGLVYAESD-----RIANAANLSALVYHALPD-----LNWV  
 YP\_001764423.1 MFTLSNDPTASKADQYATLVEQARSLVESERD-----LTANAANFSALVYHSLDR-----LNWA  
 NP\_970249.1 SINYS-----DKTKFYKELHSEAEGLAEK--EWFVN-----LANFSALLKQHLPEIN-----WV  
 YP\_001059788.1 MFALSEALPSSKPALYETLAAQARALVETETD-----IVANAANFASLVYHSLDG-----LNWA  
 YP\_001081316.1 MFALSEALPSSKPALYETLAAQARALVETETD-----IVANAANFASLVYHSLDG-----LNWA  
 YP\_001875000.1 -----MEIILKQIEMLLS-----PEID-----AVANMANTAAVIFNSLPR-----LNWA  
 YP\_278248.1 -----MLVQQYKSLIADVEK-----IYSILANTSAFIYQNFKN-----LNWA  
 YP\_001309672.1 MFDIKIFEGMSTENKLDNMLIMLEGLIQGDSDS-----SITKLCNASALINSLIDR-----INWC  
 YP\_001576818.1 MTAAK-----KEEYELLVEQAKALVAGESD-----WIANTANLSALLFNSLNN-----VNFA  
 YP\_193206.1 MAATT-----KENYELLVQQAQALIANESD-----WIANTANLSALLFNLSLSD-----VNFA  
 YP\_199405.1 MFATSS-LTGSKPEQYAQLTAQAQALVHGEPD-----RIANAANLAALIFHSLPS-----LNWA  
 YP\_001915608.1 MFATSS-LTGSKPEQYAQLTAQAQALVHGEPD-----RIANAANLAALIFHSLPS-----LNWA  
 YP\_002509654.1 MEQ-----KEEKLREINEKLEYLIGNERD-----WLANLANAAALLYNELDE-----VNWA  
 YP\_757341.1 -----MSSKADAYQDVRKQIAAVIAGETS-----RTLARLATASCLLREMFGER-----FFWT  
 YP\_810624.1 YMETK-----QTRYSLNDQAQSLLDGEHD-----LIANMSNLVSLIFNSDQN-----INGT  
 YP\_244708.1 MFATSS-LTGSKPEQYAQLTAQAQALVHGEPD-----RIANAANLAALIFNSLPS-----LNWA  
 NP\_635978.1 MFATSS-LTGSKPEQYAQLTAQAQALVHGEPD-----RIANAANLAALIFNSLPS-----LNWT  
 XP\_505859.1 YSRFSS---ESKSELYDTMASNVEALVDGQTNWVAN-----LSNASSIWHGLKSLPEPSSD-----INWA  
 NP\_964546.1 MAATT-----EDNYQLLLKQAQALVEGEND-----WIANTANISALLFNSLNN-----VNFA  
 YP\_001261873.1 MYMFDIDRHGDKASLYADMAAALALTADEPD-----AIANMANAAALIWEYLPD-----LNWA  
 YP\_814311.1 MSATT-----ENNYQLLVKQAEALVDGESD-----WIANTANVSALLFNALND-----VNFA  
 NP\_298520.1 MLAPFI-LTGNKPEQYAQLEAQAKALIHGETD-----RIANAANLAALIFHSLPG-----LNWV  
 YP\_001775202.1 MLAPFI-LTGNKPEQYAQLEAQAKALIHGETD-----RIANAANLAALIFHSLPG-----LNWV  
 YP\_001829224.1 MLAPFI-LTGNKPEQYAQLEAQAKALIHGETD-----RIANAANLAALIFHSLPG-----LNWV  
 NP\_778732.1 MLAPFI-LTGNKPEQYAQLEAQAKALIHGETD-----RIANAANLAALIFHSLPG-----LNWV  
 NP\_246070.1 -----MMNYALLLKQLEQILEPETY-----IISRMANTSAFLYQHMPD-----LNWV  
 XP\_645637.1 AEDLEISKG-SKEEQYENLLPQIEGLLTGENN-----QIANLANVTAALKEQFN-----FFWV  
 XP\_456263.1 YSSFQT---TDRKKALEQLLISYEA LAEGQDNWVCN-----LANAASLIWHCYISLN---VD-----VNWA  
 YP\_001300883.1 ETSFKQTTS-NKVERYRLFLPQFELLISDEKE-----EISVLANTAAALREAFG-----FFWV  
 YP\_812434.1 MAAAS-----QAEYELLLEQAKALTAGESD-----WIANAGNSVALLKAGMRN-----VNFA  
 NP\_814796.1 QTREN-----KKAAYELCLQQLSGLLEIETD-----AIANLANSSALLAQTLPD-----TVFA  
 NP\_358362.1 MLKSE-----KQSRYQMLNEELSFLLGETN-----VLANLSNASALIKSRFPN-----TVFA  
 YP\_816246.1 MLKSE-----KQSRYQMLNEELSFLLGETN-----VLANLSNASALIKSRFPN-----TVFA  
 YP\_001694316.1 MLKSE-----KQSRYQMLNEELSFLLGETN-----VLANLSNASALIKSRFPN-----TVFA  
 YP\_001835526.1 MLKSE-----KQSRYQMLNEELSFLLGETN-----VLANLSNASALIKSRFPN-----TVFA  
 YP\_002037500.1 MLKSE-----KQSRYQMLNEELSFLLGETN-----VLANLSNASALIKSRFPN-----TVFA  
 NP\_345351.1 MLKSE-----KQSRYQMLNEELSFLLGETN-----VLANLSNASALIKSRFPN-----TVFA

Supplemental data

XP\_001385863.2 YSNVTG---LSKEETLQHIIDSYEALASDTTNWVAN-----LSNCSLLVWHAYHSLN---VP-----VNWAWA  
 NP\_985662.1 YSNFSA---SDRSEALIYMIESYQALAEHQDNMVCN-----LANASSLLWHVYRNLN---VK-----VNWAWA  
 YP\_759928.1 -----MDKAEAYRQLKEEIDSVVAGETS-----DTARYASAACLLAQAFKPR-----FFWT  
 YP\_002123053.1 MNKTT-----KIEHYQLLLAQAKALFSNESN-----ALANLSNASALLKMTLPN-----SVFA  
 YP\_002131343.1 EAFNEIVLPASKAERYAAVAEEIASVLDGEPN-----LVARMATVASMLANSFEH-----YFWT  
 XP\_001683506.1 ---TPAPTFSSKKELVDWLVKQVEALVHDMSKRFTPQAN-----LVIGLSNTAALCFYELNRFNPEAALEKLRVNWFW  
 NP\_012854.1 HVNYSSN--LNKEEILEQLLLSYEGLSDGQVNWVCN-----LSNASSLIWHAYKSLA---VD-----INWAWA  
 XP\_460154.1 YTSYSN--DGGKEEILQSVVDSYEALSYDTRNWVAN-----LANCSSLLVWHAYHSMK---IN-----VNWWS  
 XP\_001801028.1 ASAFA--EGLSKKEVYAQVLEQARILFDGQRNWVCN-----FSNTSSLLWHALHSLPSPSHS-----VNWAWA  
 YP\_001201197.1 MTKQE-----KISNYQLLLAQLEALLDGETN-----ALANLSNASALLNQLPN-----SVFT  
 XP\_001484046.1 YSNYKG--DETKEETLQSVVDSYEALSSDTQNWVAN-----LANCSSLIWHAYHSLN---IP-----VNWAWA  
 NP\_274882.1 MHALHFSAS-DKAALYREVLQPQIESVVAD EAD-----WVANLANATAAVLKEAFG-----WFWVWV  
 YP\_001302571.1 AEELRIKNG-DKQEMYETLLPQIASLVGN ETD-----LIANMANVAAALKQTFG-----FFWVWV  
 YP\_002000650.1 MHALHFSAS-DKAALYREVLQPQIESVVAD EAD-----WVANLANATAAVLKEAFG-----WLVWVWV  
 YP\_001682978.1 EAFNDKTLTGDKAARYAELAQEIASVLDG ETD-----LTARMATVASMLASSFDH-----YFWT  
 YP\_002342048.1 MHALHFSAS-DKAALYREVLQPQIESVVAD ETD-----WVANLANATAAVLKEAFG-----WFWVWV  
 YP\_207199.1 MHALHFSAS-DKAALYREVLQPQIESVVAD EAD-----WVANLANATAAVLKEAFG-----WLVWVWV  
 XP\_844799.1 GASTPTGGRSDKVTFYSRLVKEVQGIVEFPSKRLAPAAN-----AIINLSNVAASLFYGLNRHANPEAVLQSPPVNWL  
 YP\_001598496.1 MHALHFSAS-DKAALYREVLQPQIESVVAD ETD-----WVANLANATAAVLKEAFG-----WFWVWV  
 YP\_974447.1 MHALHFSAS-DKAALYREVLQPQIESVVAD ETD-----WVANLANATAAVLKEAFG-----WFWVWV  
 XP\_001465858.1 ---TPAPTFSSKKELVDWLVKQVEALVHDMSKRFTPQAN-----LVIGLSNVAALCFYELNRFNPEAALEKLVNWF  
 YP\_001280815.1 QAINPIDPNANKAEKYQLLLKQAEATISS ESD-----LIANMANLTALLKDTFN-----WFWWI  
 NP\_664843.1 MNKSK-----KIEQYQLMIAQAKELFANESN-----ALANLSNASALLNMTLPN-----SVFA  
 NP\_802083.1 MNKSK-----KIEQYQLMIAQAKELFANESN-----ALANLSNASALLNMTLPN-----SVFA  
 YP\_280574.1 MNKSK-----KIEQYQLMIAQAKELFANESN-----ALANLSNASALLNMTLPN-----SVFA  
 YP\_001128311.1 MNKSK-----KIEQYQLMIAQAKELFANESN-----ALANLSNASALLNMTLPN-----SVFA  
 YP\_002286076.1 MNKSK-----KIEQYQLMIAQAKELFANESN-----ALANLSNASALLNMTLPN-----SVFA  
 XP\_390238.1 ASNFA--EGVTKEDAYEQVLWQAEGLVTDQRNWVCN-----LSNAAASLLWHAYKSLGSPSKD-----VNWAWA  
 XP\_001565241.1 ---LPAPIFTSKKELVDWLVKQVEALVDGMSKRFTPQAN-----LIIGLSNVAALCFYELNRFNCPGAALEKLVNWF  
 YP\_596891.1 MNKSK-----KIEQYQLMIEQAKELFANESN-----ALANLSNASALLNMTLPN-----SVFA  
 YP\_600772.1 MNKSK-----KIEQYQLMIEQAKELFANESN-----ALANLSNASALLNMTLPN-----SVFA  
 YP\_001351938.1 AEVLSFNKLGKADIYAELLPQIEALLA EEPD-----LIANQANATAAVLHQAFG-----FHWVWV  
 XP\_001910908.1 ---K--IELTK-----GSN-----LSNTSSLLWHLRSLPSPSSS-----VNWAWA  
 XP\_446236.1 YTNFNA---TDRSEALQLLIDSYEALAMDQRNWVCN-----LANAASLLWHAYKSLN---VN-----VNWWT  
 NP\_607473.1 MNKSK-----KIEQYQLMIAQAKELFANESN-----ALANLSNASALLNMTLPN-----SVFT  
 YP\_060405.1 MNKSK-----KIEQYQLMIAQAKELFANESN-----ALANLSNASALLNMTLPN-----SVFT  
 YP\_602707.1 MNKSK-----KIEQYQLMIAQAKELFANESN-----ALANLSNASALLNMTLPN-----SVFT  
 NP\_269471.1 MNKSK-----KIEQYQLMIAQAKELFANESN-----ALANLSNASALLNMTLPN-----SVFT  
 YP\_282476.1 MNKSK-----KIEQYQLMIAQAKELFANESN-----ALANLSNASALLNMTLPN-----SVFT  
 YP\_598792.1 MNKSK-----KIEQYQLMIAQAKELFANESN-----ALANLSNASALLNMTLPN-----SVFT  
 YP\_099090.1 AEELTFISG-SKEEQYLSLLPQVRS LIEGEVD-----LVANLANVAAALKEAFD-----FFWVWV  
 NP\_421082.1 EAFNDITLSADKATRYAEVADEIASVLDGEPN-----LTARMATVASMLANSFDS-----YFWAWA

Supplemental data

YP\_001034962.1 MNKTE-----KVSNYQILLAQLEALLLEG<sup>E</sup>ETN-----ALANLSNASALLNQALPH-----SVFT  
 YP\_211509.1 AEELTFISG-SKEEQYLSLLPQVRS<sup>L</sup>LIEG<sup>E</sup>V<sup>D</sup>-----LVANLANVAAALKEAFD-----FFWV  
 XP\_001940256.1 -----MSKKEVYAQVLEQARS<sup>L</sup>-----N-----FSNTASLLWHAYHSLPSPSSS-----VNWA  
 YP\_001450196.1 MNTKD-----KISNYQILLAQLEALLLEG<sup>E</sup>ETN-----ALANLSNASALLNQALPH-----SVFT  
 XP\_680937.1 SSYFG---SGSKAEIYAQVIQQAKGLV<sup>T</sup>GTGQRNWVRI-----LISIVSNFNSVASLLWHAYAALPAPSSS-----VNWA  
 XP\_001265696.1 SSYFSTSQEP<sup>T</sup>KAEVYAQVLEQAKGLV<sup>T</sup>GTGQRNWATQ-----PSNFSNIASLLWHAYAALPPPSSS-----VNWA  
 XP\_367405.1 ASNFG--ANVTKEEAYKQVLEQAEG<sup>L</sup>FDGQRNWVCN-----LANTASLLWHAYHSLPSPSSA-----VNWA  
 YP\_001033719.1 MNKQE-----KIEGYELLNLQLKALLSEQNY-----TLNLANASSLLWSFLPE-----QVYT  
 YP\_812051.1 MNKQE-----KIEGYELLNLQLKALLSEQNY-----TLNLANASSLLWSFLPE-----QVYT  
 NP\_810723.1 AENLLIHTG-NKEEKYRELLPQLQALV<sup>S</sup>SETN-----RIANLANIAAALKQTFH-----FFWV  
 YP\_141537.1 MTNEE-----KKIAYDLMLAQANV<sup>L</sup>FANEDN-----ALANFANASALLNTTLPN-----SVFT  
 NP\_721920.1 MKNQE-----KISAYQILLAQQSMFAN<sup>E</sup>TN-----ALANLANATAMLNK<sup>T</sup>LPN-----AIFT  
 YP\_820528.1 MTNEE-----KKIAYELMLAQAKV<sup>L</sup>FANEDN-----ALANFANASALLNTTLPN-----SVFT  
 XP\_001246405.1 -----MTCG--IWKAY-----FPSNLASVSLLWHAYASLPAPSNA-----VNWA  
 YP\_612063.1 -----MRVNYEDLSKVVAALTEG<sup>E</sup>ETD-----EVALMATVVC<sup>E</sup>LHHADDR-----FDWT  
 YP\_444835.1 -PASSTATASDKAERYADTRRRIDALLDGPTD-----WVSAMATVACELHHSFDH-----YDWT  
 NP\_943356.1 -----MCWRRIS-----  
 YP\_631535.1 AEVTLDLRGMPKAEAYAE<sup>L</sup>KQHVRVAVLEGIDD-----DITGMATMSCLLHHA<sup>F</sup>FG-----HLWT  
 NP\_687842.1 MNKSK-----KIENYQLLLLQAQALFSD<sup>E</sup>TN-----ALANLSNASAMLNAML<sup>P</sup>N-----SVFT  
 YP\_329573.1 MNKSK-----KIENYQLLLLQAQALFSD<sup>E</sup>TN-----ALANLSNASAMLNAML<sup>P</sup>N-----SVFT  
 XP\_001692446.1 PPLPVTASNEEREARYELVLESVKSVLEG<sup>E</sup>DD-----WVAVMATVACLLHEAF<sup>E</sup>Y-----YHWT  
 NP\_390842.2 VEKQSG---DKEKDYQ<sup>L</sup>LLKQLEAMTE<sup>E</sup>ETD-----QIANYANASALLYHSL<sup>P</sup>E-----VNWA  
 YP\_511991.1 APHSCPQRMDLPMADYATLTKT<sup>I</sup>ASL<sup>T</sup>EG<sup>E</sup>TD-----TITL<sup>M</sup>ATVACELHHA<sup>D</sup>PR-----FDWT  
 XP\_719233.1 YSNLKS<sup>G</sup>-DFSKEETLQHVLD<sup>S</sup>YKAL<sup>E</sup>TD--NWVAN-----LSNCSLLWHAYKSLN---IN---VNWT  
 NP\_735295.1 MNKSK-----KIENYQLLLLQAQALFSD<sup>E</sup>TN-----ALANLSNASAMLNAML<sup>P</sup>N-----SVFT  
 YP\_168601.1 -----MTVDYPSLAKTIAALTEG<sup>E</sup>TD-----PVALMATVTC<sup>E</sup>VHHSDDR-----FNWT  
 YP\_001169098.1 -----MDYDRLDQTIDALCHG<sup>E</sup>RD-----TVALMATVACELHHA<sup>H</sup>PL-----SDWT  
 XP\_001216799.1 SSYFG--GSGSKAEIYTQVLEQAKGLV<sup>T</sup>GTGQRNWVTH<sup>T</sup>NA-----PRHPSELTINSNFSNASLLWHAYAALPSPSSS-----VNWA  
 YP\_437091.1 DSLPLLSSEEEKSAHYQHTLR<sup>A</sup>IRHAI<sup>E</sup>GTD-----WTAILSTVVC<sup>E</sup>LHHRF<sup>E</sup>Y-----FHWT  
 XP\_001390389.1 SSYFGA-GNGSKSEVYTQVLEQARG<sup>L</sup>VYDQRNWLTN-----HF<sup>S</sup>HRQQVSNFNSVASLLWHAYAALPAPSSS-----VNWA  
 XP\_001550500.1 SSTFK--ADISKA<sup>E</sup>AN--LSNAASL<sup>L</sup>WHAYKSL<sup>P</sup>S-----PSSEVNWAGFYTL<sup>D</sup>P<sup>T</sup>STP-----SKPS  
 XP\_001273080.1 SSYFASSGQASKADIEQ<sup>L</sup>LEQAKGLV<sup>T</sup>GTGQRNWVH<sup>L</sup>PSHPTLQPPPHKPSHL<sup>T</sup>HIQPSNLSNIASLLWHAYAALPPPSSS-----VNWA  
 YP\_001042044.1 -----MDYDQLDQTIEALCHG<sup>E</sup>QD-----TVALMATVACEI<sup>H</sup>H<sup>A</sup>PL-----SDWT  
 YP\_916587.1 -----MPDYDDLAARIQAL<sup>T</sup>H<sup>D</sup>ETD-----EVALMATLACEI<sup>H</sup>HS<sup>D</sup>ER-----FDWT  
 XP\_961529.1 ASNFA--ANVTKEEAYQVLDQAEG<sup>L</sup>FYEQRNWVCN-----LSNCAALLWHAFKSLPAPS<sup>N</sup>Q-----VNWA  
 YP\_351544.1 -----MDYDQLDQTIEALCHG<sup>E</sup>QD-----TVALMATVACEI<sup>H</sup>H<sup>A</sup>PL-----SDWT  
 XP\_001588803.1 ASTFK--ADISKEEAYAQVLEEARG<sup>L</sup>FDGQRNWIA-----IEIEIS---FYTL<sup>D</sup>PS<sup>S</sup>T-----KPS  
 XP\_762195.1 AAALPS-YVVTKADFYDHLESSLISLIDP<sup>G</sup>TDWISA-----LSNASSLVFNSMNRFP<sup>A</sup>WT<sup>S</sup>KR---INWA  
 XP\_001537789.1 -----MVSNLANVSLLWHAYAALPAPSSA-----VNWA  
 YP\_001198994.1 MTKQE-----KISNYQ<sup>L</sup>LLAQLEALLDG<sup>E</sup>ETN-----ALANLSNASALLNPAL<sup>P</sup>N-----SVFT  
 NP\_390842.1 VEKQSG---DKEKDYQ<sup>L</sup>LLKQLEAMTE<sup>E</sup>ETD-----QIANYANASALLYHSL<sup>P</sup>E-----VNWA  
 YP\_001469780.1 KSFRRG---ETMGSY<sup>T</sup>SKKQLFEE<sup>L</sup>TNQIEEII<sup>F</sup>QNNI-----HESMEEICNLLYENISY-----YNWV

Supplemental data

NP\_623333.1 -----VFERLIDEIKAKARDITDMDT-----FYKEVVRIILSENVPI-----YNWT  
 YP\_001567589.1 MKFINSTPPNKKKADFWILYDKIKTLLISDKNYNDKQS-----ILKLISQLLAERIPY-----YNWV  
 NP\_228329.1 IEFRKG---KEIGNYGGKKEYFDSLKEIEKILKRG-----KEALGDLCEFLRNHVSY-----YDWW  
 YP\_001244004.1 IEFRKG---KEIGNYGGKKEYFDSLKEIEKILKRG-----KEALGDLCKFLRNHVSY-----YDWW  
 YP\_001738457.1 IEFRKG---KEIGNYGGKKEYFDSLKEIEKILKRG-----KEALGDLCEFLRNHVSY-----YDWW  
 YP\_591728.1 -----TREQLTAQLKTMETAPTVED-----LMTDIVGRLQQYLPH-----YNWV  
 YP\_001193798.1 -----MTFQELQPKISAIISDNNKVRDEK-----LLAVCQLLNENVEY-----YNWV  
 YP\_001296902.1 -----MTFEALKPKVTEITTNVAFSRDEK-----LLKVCQLLEANITY-----YTWW  
 XP\_001439866.1 MNQPN-----KVQYVEKVIDLLEHFLKKYQN-----LGRNAIETSIVSLLKNNVSG-----LFFV  
 XP\_001438779.1 MNQHN-----KVQYVEKVLDDLDFLKKYQN-----LGRNAIETSIVSLLKNNVTG-----LFFV  
 YP\_001319456.1 -----KKELFLRLEKKAFALISKEEQLDN-----VYQGIVELLDDNNIPY-----YNWT  
 XP\_001022412.1 IDQEA-----NKIIEKAFKQLQDFLEYNTKNK-----LTFEAKLTSIASVVKNLIPD-----FFFV  
 YP\_001306613.1 VHFKN-----EKEGNFYDKDEIFEEILMELN--SVDD-----ESYMRKACEILYDKIPY-----YNWV  
 YP\_002335308.1 IHFRNG---EMNGIYDKDELFDKLLDKLEKESKDD--P-----VKYMRKICQYLYDEIPY-----YDWW  
 NP\_394308.1 -----MDLKEFARSQ-----MQAACQYLKEKNPK-----YDWW  
 YP\_862969.1 -----MTFDKLPQIEVLLKKEEDLEVKDK-----LTQVCELLEQNIPY-----YDWW  
 YP\_023758.1 -----MAILEENLYLKIRDY-----LNDLCSYLRSENEK-----YNWV  
 NP\_111339.1 -----MDLNDFSIVK-----LQEVCRILKESNKK-----YDWW  
 YP\_001380982.1 -----MFGFTMDSQRAGALEALRAAHRPYR-----EALAEAAAILQRLPR-----YTGV  
 YP\_806472.1 -MT-----TLDPIIVDQLDGLLTGETN-----PITVLANASALLNDLMTD-----LNWA  
 YP\_001987415.1 -MT-----TLDPIIVDQLDGLLTGETN-----PITVLANASALLNDLMTD-----LNWA  
 NP\_785802.1 MAT-----TETSLMNQQLDALLFQETN-----LVANLANASALLNSTYDN-----LNWA  
 YP\_818384.1 -MS-----KVISLVGQQLDALLENETN-----IVSNLANAAALLFQNYEN-----LNWA  
 YP\_001621174.1 -----MDYKVLLESAEGLLSTEPT-----NLSILSNASAFLNDAIPD-----LNWV

70 80 90 100 110 120

NP\_288269.1 GFYLL--E-D-----DTLVLCPEFGK-IACVRIP--VGRVCGTAVARN--QVQRIEDVHAFDGHIACDAAASNSEIV  
 YP\_002403065.1 GFYLL--E-D-----DTLVLCPEFGK-IACVRIP--VGRVCGTAVARN--QVQRIEDVHAFDGHIACDAAASNSEIV  
 YP\_002397981.1 GFYLL--E-D-----DTLVLCPEFGK-IACVRIP--VGRVCGTAVARN--QVQRIEDVHAFDGHIACDAAASNSEIV  
 YP\_002412850.1 GFYLL--E-D-----DTLVLCPEFGK-IACVRIP--VGRVCGTAVARN--QVQRIEDVHAFDGHIACDAAASNSEIV  
 YP\_001880631.1 GFYLL--E-D-----DTLVLCPEFGK-IACVRIP--VGRVCGTAVARN--QVQRIEDVHAFDGHIACDAAASNSEIV  
 YP\_002391608.1 GFYLL--E-D-----DTLVLCPEFGK-IACVRIP--VGRVCGTAVARN--QVQRIEDVHAFDGHIACDAAASNSEIV  
 YP\_001730808.1 GFYLL--E-D-----DTLVLCPEFGK-IACVRIP--VGRVCGTAVARN--QVQRIEDVHAFDGHIACDAAASNSEIV  
 ZP\_03003290.1 GFYLL--E-D-----DTLVLCPEFGK-IACVRIP--VGRVCGTAVARN--QVQRIEDVHAFDGHIACDAAASNSEIV  
 YP\_001743413.1 GFYLL--D-D-----DTLVLCPEFGK-IACVRIP--VGRVCGTAVARN--QVQRIEDVHAFDGHIACDAAASNSEIV  
 YP\_002407226.1 GFYLL--D-D-----DTLVLCPEFGK-IACVRIP--VGRVCGTAVARN--QVQRIEDVHAFDGHIACDAAASNSEIV  
 YP\_002329476.1 GFYLL--E-D-----DTLVLCPEFGK-IACVRIP--VGRVCGTAVARN--QVQRIEDVHAFDGHIACDAAASNSEIV  
 YP\_002382399.1 GFYLL--E-G-----ETLVLCPEFGK-IACVRIP--VGRVCGTAVARN--EVQRIEDVHAFDGHIACDAAASNAEIV  
 ZP\_03445135.1 GFYLL--E-D-----DTLVLCPEFGK-IACVRIP--VGRVCGTAVARN--QVQRIEDVHAFDGHIACDAAASNSEIV  
 YP\_688895.1 GFYLL--E-D-----DTLVLCPEFGK-IACVRIP--VGRVCGTAVARN--QVQRIEDVHAFDGHIACDAAASNSEIV  
 YP\_669680.1 GFYLL--E-D-----DTLVLCPEFGK-IACVRIP--VGRVCGTAVARN--QVQRIEDVHAFDGHIACDAAASNSEIV  
 NP\_416346.4 GFYLL--E-D-----DTLVLCPEFGK-IACVRIP--VGRVCGTAVARN--QVQRIEDVHAFDGHIACDAAASNSEIV

Supplemental data

ZP\_02903917.1 GFYLL--E-D-----DTLVLPFFQK-IACVRIP--VGRGCGTAVARN--EVQRIEDVHAFDGHIACD AASNSEIV

ZP\_03282954.1 GFYLL--E-D-----NTLVLPFFQK-IACVRIP--VGRGCGTAVATN--QVQRVEDVHAFDGHIACD AASNSEIV

YP\_001452718.1 GFYLL--E-N-----DTLVLPFFQK-LACVRIP--VGRGCGTAVAQN--QVQRIEDVHAFDGHIACD SASNAEIV

YP\_001570142.1 GFYLL--E-G-----DTLVLPFFQK-IACVRIP--VGRGCGAAVAQN--KVQRID DVHAFDGHIACD AASNAEIV

NP\_460803.1 GFYLL--E-G-----DTLVLPFFQGR-IACVRIP--VGRGCGAAVAQN--KVQRID DVHAFDGHIACD AASNAEIV

YP\_150310.1 GFYLL--E-G-----DTLVLPFFQGR-IACVRIP--VGRGCGAAVAQN--KVQRID DVHAFDGHIACD AASNAEIV

YP\_002141797.1 GFYLL--E-G-----DTLVLPFFQGR-IACVRIP--VGRGCGAAVAQN--KVQRID DVHAFDGHIACD AASNAEIV

YP\_002243298.1 GFYLL--E-G-----DTLVLPFFQGR-IACVRIP--VGRGCGAAVAQN--KVQRID DVHAFDGHIACD AASNAEIV

NP\_456352.1 GFYLL--E-G-----DTLVLPFFQGR-IACVRIP--VGRGCGAAVAQN--KVQRID DVHAFDGHIACD AASNAEIV

NP\_804849.1 GFYLL--E-G-----DTLVLPFFQGR-IACVRIP--VGRGCGAAVAQN--KVQRID DVHAFDGHIACD AASNAEIV

YP\_001587603.1 GFYLL--E-G-----DTLVLPFFQGR-IACVRIP--VGRGCGAAVAQN--KVQRID DVHAFDGHIACD AASNAEIV

ZP\_02666379.2 GFYLL--E-G-----DTLVLPFFQGR-IACVRIP--VGRGCGAAVAQN--KVQRID DVHAFDGHIACD AASNAEIV

ZP\_02832604.2 GFYLL--E-G-----DTLVLPFFQGR-IACVRIP--VGRGCGAAVAQN--KVQRID DVHAFDGHIACD AASNAEIV

YP\_001177122.1 GFYLL--E-G-----NTLVLPFFQK-LACVRIP--VGRGCGTAVAQN--QVQRVEDVHAFDGHIACD SASNAEIV

YP\_002226291.1 GFYLL--E-G-----DTLVLPFFQGR-IACVRIP--VGRGCGAAVAQN--KVQRID DVHAFDGHIACD AASSAEIV

NP\_754135.1 GFYLL--E-D-----DTLVLPFFQK-IACVRIP--VGRGCGTAVARN--QVQRIEDVHAFDGHIACD AASNSEIV

ZP\_02347214.1 GFYLL--E-G-----DTLVLPFFQGR-IACVRIP--VGRGCGAAVAQN--KVQRID DVHAFDGHIACD AASNAEIV

ZP\_02574893.1 GFYLL--E-G-----DTLVLPFFQGR-IACVRIP--VGRGCGAAVAQN--KVQRID DVHAFDGHIACD AASNAEIV

ZP\_02659310.1 GFYLL--E-G-----DTLVLPFFQGR-IACVRIP--VGRGCGAAVAQN--KVQRID DVHAFDGHIACD AASNAEIV

ZP\_02663512.1 GFYLL--E-G-----DTLVLPFFQGR-IACVRIP--VGRGCGAAVAQN--KVQRID DVHAFDGHIACD AASNAEIV

ZP\_02681881.1 GFYLL--E-G-----DTLVLPFFQGR-IACVRIP--VGRGCGAAVAQN--KVQRID DVHAFDGHIACD AASNAEIV

ZP\_02696584.1 GFYLL--E-G-----DTLVLPFFQGR-IACVRIP--VGRGCGAAVAQN--KVQRID DVHAFDGHIACD AASNAEIV

YP\_002041101.1 GFYLL--E-G-----DTLVLPFFQGR-IACVRIP--VGRGCGAAVAQN--KVQRID DVHAFDGHIACD AASNAEIV

YP\_002045892.1 GFYLL--E-G-----DTLVLPFFQGR-IACVRIP--VGRGCGAAVAQN--KVQRID DVHAFDGHIACD AASNAEIV

ZP\_03075263.1 GFYLL--E-G-----DTLVLPFFQGR-IACVRIP--VGRGCGAAVAQN--KVQRID DVHAFDGHIACD AASNAEIV

YP\_002114879.1 GFYLL--E-G-----DTLVLPFFQGR-IACVRIP--VGRGCGAAVAQN--KVQRID DVHAFDGHIACD AASNAEIV

YP\_002146178.1 GFYLL--E-G-----DTLVLPFFQGR-IACVRIP--VGRGCGAAVAQN--KVQRID DVHAFDGHIACD AASNAEIV

ZP\_03165709.1 GFYLL--E-G-----DTLVLPFFQGR-IACVRIP--VGRGCGAAVAQN--KVQRID DVHAFDGHIACD AASNAEIV

YP\_002215294.1 GFYLL--E-G-----DTLVLPFFQGR-IACVRIP--VGRGCGAAVAQN--KVQRID DVHAFDGHIACD AASNAEIV

ZP\_03221812.1 GFYLL--E-G-----DTLVLPFFQGR-IACVRIP--VGRGCGAAVAQN--KVQRID DVHAFDGHIACD AASNAEIV

ZP\_03342093.1 GFYLL--E-G-----DTLVLPFFQGR-IACVRIP--VGRGCGAAVAQN--KVQRID DVHAFDGHIACD AASNAEIV

ZP\_03347154.1 GFYLL--E-G-----DTLVLPFFQGR-IACVRIP--VGRGCGAAVAQN--KVQRID DVHAFDGHIACD AASNAEIV

ZP\_03352578.1 GFYLL--E-G-----DTLVLPFFQGR-IACVRIP--VGRGCGAAVAQN--KVQRID DVHAFDGHIACD AASNAEIV

ZP\_03357060.1 GFYLL--E-G-----DTLVLPFFQGR-IACVRIP--VGRGCGAAVAQN--KVQRID DVHAFDGHIACD AASNAEIV

ZP\_03371453.1 GFYLL--E-G-----DTLVLPFFQGR-IACVRIP--VGRGCGAAVAQN--KVQRID DVHAFDGHIACD AASNAEIV

ZP\_03379701.1 GFYLL--E-G-----DTLVLPFFQGR-IACVRIP--VGRGCGAAVAQN--KVQRID DVHAFDGHIACD AASNAEIV

ZP\_03383790.1 GFYLL--E-G-----DTLVLPFFQGR-IACVRIP--VGRGCGAAVAQN--KVQRID DVHAFDGHIACD AASNAEIV

ZP\_03412299.1 GFYLL--E-G-----DTLVLPFFQGR-IACVRIP--VGRGCGAAVAQN--KVQRID DVHAFDGHIACD AASNAEIV

ZP\_03217260.1 GFYLL--E-G-----DTLVLPFFQGR-IACVRIP--VGRGCGAAVAQN--KVQRID DVHAFDGHIACD AASNAEIV

YP\_002237781.1 GFYLL--E-G-----DTLVLPFFQK-LACVRIP--VGRGCGAAVAQA--QVQRVEDVHAFDGHIACD AASNSEIV

YP\_001336004.1 GFYLL--E-G-----DTLVLPFFQK-LACVRIP--VGRGCGAAVAQA--QVQRVEDVHAFDGHIACD AASNSEIV

YP\_001437512.1 GFYLL--E-D-----KTLVLPFFQK-IACVRIP--YGRGCGTAVATG--EVQRVD DVHAFDGHIACD AASNAEIV

Supplemental data

ZP\_03403067.1 GFYLL--E-G-----DTLVLPPEQGR-IACVRIP--VGRGCGAAVAQN--KVQRIDVHAFDGHIACD AASNAEIV

YP\_001907453.1 GFYLLT-E-E-----KTLVLQPEQGR-IACVRIP--VGRGCGTAVSEN--RVQRVDVHAFPGHIACD AASNAEIV

YP\_001006127.1 GFYLL--N-G-----NQLVLQPEQGR-IACVRIP--VKGKCGTAVAEN--RVQRVGDVHAFPGHIACD AASNAEIV

NP\_669181.1 GFYLV--D-G-----KQLVLQPEQGR-IACVRIP--VKGKCGTAVAEN--RVQRVGNVHAFPGHIACD AASNAEIV

NP\_993079.1 GFYLV--D-G-----KQLVLQPEQGR-IACVRIP--VKGKCGTAVAEN--RVQRVGNVHAFPGHIACD AASNAEIV

YP\_070893.1 GFYLV--D-G-----KQLVLQPEQGR-IACVRIP--VKGKCGTAVAEN--RVQRVGNVHAFPGHIACD AASNAEIV

YP\_651729.1 GFYLV--D-G-----KQLVLQPEQGR-IACVRIP--VKGKCGTAVAEN--RVQRVGNVHAFPGHIACD AASNAEIV

YP\_647856.1 GFYLV--D-G-----KQLVLQPEQGR-IACVRIP--VKGKCGTAVAEN--RVQRVGNVHAFPGHIACD AASNAEIV

YP\_001163103.1 GFYLV--D-G-----KQLVLQPEQGR-IACVRIP--VKGKCGTAVAEN--RVQRVGNVHAFPGHIACD AASNAEIV

ZP\_01888376.1 GFYLV--D-G-----KQLVLQPEQGR-IACVRIP--VKGKCGTAVAEN--RVQRVGNVHAFPGHIACD AASNAEIV

YP\_001400647.1 GFYLV--D-G-----KQLVLQPEQGR-IACVRIP--VKGKCGTAVAEN--RVQRVGNVHAFPGHIACD AASNAEIV

YP\_001607069.1 GFYLV--D-G-----KQLVLQPEQGR-IACVRIP--VKGKCGTAVAEN--RVQRVGNVHAFPGHIACD AASNAEIV

ZP\_02221459.1 GFYLV--D-G-----KQLVLQPEQGR-IACVRIP--VKGKCGTAVAEN--RVQRVGNVHAFPGHIACD AASNAEIV

ZP\_02227087.1 GFYLV--D-G-----KQLVLQPEQGR-IACVRIP--VKGKCGTAVAEN--RVQRVGNVHAFPGHIACD AASNAEIV

ZP\_02229339.1 GFYLV--D-G-----KQLVLQPEQGR-IACVRIP--VKGKCGTAVAEN--RVQRVGNVHAFPGHIACD AASNAEIV

ZP\_02237158.1 GFYLV--D-G-----KQLVLQPEQGR-IACVRIP--VKGKCGTAVAEN--RVQRVGNVHAFPGHIACD AASNAEIV

ZP\_02307206.1 GFYLV--D-G-----KQLVLQPEQGR-IACVRIP--VKGKCGTAVAEN--RVQRVGNVHAFPGHIACD AASNAEIV

ZP\_02314388.1 GFYLV--D-G-----KQLVLQPEQGR-IACVRIP--VKGKCGTAVAEN--RVQRVGNVHAFPGHIACD AASNAEIV

ZP\_02318544.1 GFYLV--D-G-----KQLVLQPEQGR-IACVRIP--VKGKCGTAVAEN--RVQRVGNVHAFPGHIACD AASNAEIV

YP\_001720525.1 GFYLV--D-G-----KQLVLQPEQGR-IACVRIP--VKGKCGTAVAEN--RVQRVGNVHAFPGHIACD AASNAEIV

YP\_001872871.1 GFYLV--D-G-----KQLVLQPEQGR-IACVRIP--VKGKCGTAVAEN--RVQRVGNVHAFPGHIACD AASNAEIV

YP\_002346706.1 GFYLV--D-G-----KQLVLQPEQGR-IACVRIP--VKGKCGTAVAEN--RVQRVGNVHAFPGHIACD AASNAEIV

YP\_001478346.1 GFYLM--D-G-----TQLVLQPEQGR-IACVRIP--VKGKCGSAVAEN--RVQRVGDVHEFPGHIACD AASNAEIV

YP\_454994.1 GFYLL--D-G-----DILVLQPEQGR-VACVRIP--LKGKCGSAAAEN--RIQRIGDVHAFQGHIACD AASNAEIV

YP\_001217052.1 GFYLM--QEN-----ELVLQPEQGR-PACVRIP--VGRGCGTAVAEN--KVQRVYDVHQFEGHIACD AASNSEIV

YP\_002150764.1 GFYLN--D-G-----NSLVLQPEQGR-VACVRIG--FKGKCGTAFSEN--KILRVNDVHQFSGHIACD SASQSEIV

YP\_856816.1 GFYLL--Q-G-----ETLVLQPEQGR-PACVRIP--VGRGCGTAVAEG--KTQLIDDVHQFEGHIACD GASNAEIV

YP\_001093925.1 GFYML--Q-G-----EQLVLQPEQGR-VACTRIP--MKGKCGTAAQSN--TTQRIADVHAFDGHIACD AASNSEIV

YP\_269525.1 GFYRL--I-D-----GELVLQPEQGR-VACIRIP--VKGKCGTCSFTG--EVQRISDVHQFDGHIACD ASSNAELV

NP\_718189.1 GFYVM--R-G-----EQLVLQPEQGR-VACTRIP--MKGKCGTAAALAN--QTQRVADVHQFDGHIACD AASNSEIV

YP\_001366642.1 GFYVM--R-G-----EQLVLQPEQGR-VACTRIP--LKGKCGTAAFTN--QTQRVADVHQFDGHIACD SASNSEIV

YP\_001554990.1 GFYVM--R-G-----EQLVLQPEQGR-VACTRIP--LKGKCGTAAFTN--QTQRVADVHQFDGHIACD SASNSEIV

YP\_737796.1 GFYVM--R-G-----EQLVLQPEQGR-VACTRIP--MKGKCGTAAQTN--QTQRVADVHQFDGHIACD SASNSEIV

YP\_869415.1 GFYVM--R-G-----EQLVLQPEQGR-VACTRIP--MKGKCGTAAQTN--QTQRVADVHQFDGHIACD SASNSEIV

NP\_797987.1 GFYLT--KGD-----ELVLQPEQGR-PACVRIP--MGRGCGTAAKTN--TTQRVYDVHEFEGHIACD AASNSEIV

YP\_001501790.1 GFYLL--K-N-----DELVLQPEQGR-VACSRIP--LKGKCGTAVATN--STQRVDVHQFAGHIACD SASNSEIV

YP\_927460.1 GFYIR--R-E-----DTLVLQPEQGR-VACTRIP--WKGKCGTAAATD--TTQRVADVHQFDGHIACD SASNSEIV

YP\_001474222.1 GFYLL--K-N-----KQLVLQPEQGR-VACTRIP--LKGKCGTAASEG--TTQRIADVHQFDGHIACD AASNSEIV

YP\_963195.1 GFYVM--R-G-----EQLVLQPEQGR-VACTRIP--LKGKCGTAAAYTN--QTQRVADVHQFDGHIACD SASNSEIV

YP\_001183724.1 GFYVM--R-G-----EQLVLQPEQGR-VACTRIP--LKGKCGTAAAYTN--QTQRVADVHQFDGHIACD SASNSEIV

YP\_733804.1 GFYVM--R-G-----EQLVLQPEQGR-VACTRIP--MKGKCGTAAQTN--QTQRVADVHQFDGHIACD SASNSEIV

YP\_001050811.1 GFYVM--R-G-----EQLVLQPEQGR-VACTRIP--LKGKCGTAAFTN--QTQRVADVHQFDGHIACD SASNSEIV

## Supplemental data

YP\_750914.1 GFYIK--R-G-----EQLVLGPFQ GK-VACTRIN--MCKG CGTAAAEN--KTQRVADVHQFDGHIACDSASNSEIV

YP\_002126297.1 GFYLY--K-E-----EQLVLGPFQ GQ-PACIRIP--LCKG CGTSASTR--TVQRIADVHQFEGHIACDAASNSEIV

YP\_130129.1 GFYLL--K-G-----DQLVLGPFQ GK-VACVRIP--VGRG CGTAISEN--KVQRVSDVHAFPGHIACDAVSNSEIV

YP\_001445537.1 GFYLT--KGD-----ELVLGPFQ GK-PACVRIP--MGRG CGTAAQTN--SVQRVYDVHEFEGHIACDAASNSEIV

YP\_661562.1 GFYLL--K-D-----NELVLGPFQ GK-PACIRIP--MGRG CGKAAETG--LSQCIHDVHAFDGHIAADADSNAEAV

YP\_001674584.1 GFYLL--K-N-----DQLVLGPFQ GK-LACSRIP--VCKG CGTAAVALN--STQRIGDVHQFAGHIACDSASNSELV

YP\_002417027.1 GFYLM--KQDQAKEK-----DELVLGPFQ GQ-PACVRIP--VGRG CGTAVATN--TVQRIHDVHEFEGHIACDAASNSEIV

NP\_934438.1 GFYLY--KED-----ELVLGPFQ GK-VACVRIP--MCKG CGTAAQTY--TVQRVHDVHEFEGHIACDAASNSEIV

NP\_761466.1 GFYLY--KED-----ELVLGPFQ GK-VACVRIP--MCKG CGTAAQTY--TVQRVHDVHEFEGHIACDAASNSEIV

YP\_001760510.1 GFYLL--K-D-----EQLVLGPFQ GK-VACSRIP--LCKG CGTSAEEK--KTMRVDVHQFDGHIACDSASNSEIV

YP\_002312133.1 GFYLL--K-N-----EQLVLGPFQ GK-VACTRIP--ICKG CGTAVEKN--ETQRIADVHQFVGHIAADSAVSELV

YP\_562727.1 GFYIK--R-E-----DQLVLGPFQ GK-VACTRIQ--LCKG CGNAAAQN--ITLRVADVHQFEGHIACDSASNSEIV

NP\_693123.1 GFYLW--EEN-----ELILGPFQ GL-PACIRIP--YCKG CGTAVSEQ--QTQRVDVHAFPGHIACDGATNSEIV

YP\_001699747.1 GFYLL--QEN-----ELVLGPFQ GL-PACVRIP--IGRG CGTAVATK--ETIVVKDVHEFPGHIAADAAQSSEIV

YP\_001343242.1 GFYFARG-----EELVLGPFYV GK-VACTRIP--LGRG CGKAAITL--QTQRIEDVHAFDGHIAADAAASEV

YP\_001141806.1 GFYLL--Q-G-----DTLVLGPFQ GK-PACVRIP--VGRG CGTAVAEG--KTQLIDVHQFEGHIACDGASNAEIV

YP\_204661.1 GFYLF--KEN-----ELVLGPFQ GK-PACIRIS--VCKG CGTAFATK--TVQRIDVHQFAGHIACDAESNSEIV

YP\_301135.1 GFYLI--ENE-----ALILGPFQ GH-PACVHIA--ICKG CGTAVSEE--QTQLVDVNAFPGHIACDANSKSEIV

YP\_002156075.1 GFYLF--KEN-----ELVLGPFQ GK-PACIRIS--VCKG CGTAFATE--TVQRIDVHQFAGHIACDAESNSEIV

NP\_244074.1 GFYLI--KEG-----ELVLGPFQ GL-PACVRIP--IGRG CGTAAKEE--QTVRVEDVHQFPGHIACDAARSSEIV

YP\_001559126.1 GFYLMKKGS-----LILGPFQ GK-VACIHIP--VGRG CGTAVNEG--KTQIVKDVHEFPGHIAADSAASNSEIV

YP\_080250.1 GFYFAK-D-----GELVLGPFQ GL-PACVRIP--FKG CGTAYTNG--RVERVEDVNAFPGHIACDAASQSSEIV

YP\_253122.1 GFYLI--ENE-----ELILGPFQ GH-PACVHIA--ICKG CGTAVAED--KTQLVKDVHAFPGHIACDANSKSEIV

YP\_261333.1 GFYLNRN-----QELVLGPFQ GQ-IACVRIP--FGRG CGTAAATL--QTQRVEDVHAFAGHIACDSASNSELV

YP\_001187407.1 GFYLVKD-----GELVLGPFQ GK-VACVRIA--FGRG CGAAAASL--QTQRVEDVHAFAGHIACDSASNSELV

YP\_001422246.1 GFYFAK-E-----GELVLGPFQ GL-PACVRIP--FGRG CGTAYSNG--DVQRIADVNAFPGHIACDAASQSSEIV

YP\_001748360.1 GFYLNRN-----EELVLGPFQ GQ-VACVRIP--FSRG CGAAAATR--QTQRVEDVHAFAGHIACDSASNSELV

YP\_155660.1 GFYLTRSD-----NELVLGPFQ GR-VACVRIP--FKG CGVAAETQ--TCQRVEDVHQFAGHIACDSASNSEV

NP\_744032.1 GFYLNRN-----EELVLGPFQ GQ-VACVRIP--FSKG CGAAAATR--QTQRVEDVHAFPGHIACDSASNSELV

YP\_001269146.1 GFYLNRN-----EELVLGPFQ GQ-VACVRIP--FSKG CGAAAATR--QTQRVEDVHAFPGHIACDSASNSELV

YP\_236680.1 GFYLNRN-----EELVLGPFQ GQ-IACVRIP--FGRG CGAAAQSR--QTQRVQDVHEFPGHIAADSAASNSELV

YP\_001667695.1 GFYLNRN-----EELVLGPFQ GQ-VACVRIP--FKG CGAAAATR--QTQRVEDVHAFPGHIACDSASNSELV

YP\_188854.1 GFYLI--ENN-----ELILGPFQ GH-PACVHIA--ICKG CGTAVSSG--ETQRVKDVHQFPGHIACDANSQSSEIV

YP\_002275225.1 GFYILRDGE-----LVLPFQ GR-VACTRIA--VGRG CGTAAARR--STIVVPDVHAFPGHIACDTASESEIV

YP\_804779.1 GFYLFDSKKD-----ELVLGPFQ GN-VACMHIK--NSG CGTAFKEN--KVLRVENVHEFPGHIAADSAASNSEIV

NP\_470973.1 GFYLLEKETN-----QLVLGPFQ GL-PACIRIP--LCKG CGSAASDQ--KTYIVENVHDFPGHIACDAASNSEIV

YP\_607257.1 GFYINRS-----EELVLGPFQ GQ-VACVRIP--FSRG CGAAAATR--TTQRVEDVHAFPGHIACDSASNSELV

YP\_001860169.1 GFYFALD-----GELVIGPFQ GK-PACVRIP--MGRG CGRAAQAL--ETQVVPDVDAFPGHIACDSASRSEIV

NP\_465120.1 GFYLLEKETN-----QLVLGPFQ GL-PACIRIP--LCKG CGSAASDQ--KTYIVENVHDFPGHIACDAASNSEIV

NP\_372242.1 GFYLL--EQN-----ELILGPFQ GH-PACVHIP--ICKG CGTAVSER--RTQVVADVHQFEGHIACDANSKSEIV

NP\_374828.1 GFYLL--EQN-----ELILGPFQ GH-PACVHIP--ICKG CGTAVSER--RTQVVADVHQFEGHIACDANSKSEIV

YP\_001247140.1 GFYLL--EQN-----ELILGPFQ GH-PACVHIP--ICKG CGTAVSER--RTQVVADVHQFEGHIACDANSKSEIV

Supplemental data

YP\_001316940.1 GFYLL--EQN-----ELILGPFQGH-PACVHIP--IGKVCGTAVSER--RTQVVDVHQFEGHIACDANSKSEIV  
 YP\_001442294.1 GFYLL--EQN-----ELILGPFQGH-PACVHIP--IGKVCGTAVSER--RTQVVDVHQFEGHIACDANSKSEIV  
 YP\_002314836.1 GFYIA--EGN-----ELVLGPFQGL-PACVRIP--FGKVCGTAAAEK--RTVRVADVHAFPGHIACDAASQSEIV  
 YP\_001814701.1 GFYLLMDQEQN-----ELVLGPFQGL-PACVRIP--LGRVCGTAAQDQ--TTQLVMDVHAFPGHIACDAATNSEIV  
 NP\_646478.1 GFYLL--EQN-----ELILGPFQGH-PACVHIP--IGKVCGTAVSER--RTQVVDVHQFEGHIACDANSKSEIV  
 YP\_043764.1 GFYLL--EQN-----ELILGPFQGH-PACVHIP--IGKVCGTAVSER--RTQVVDVHQFEGHIACDANSKSEIV  
 YP\_186602.1 GFYLL--EQN-----ELILGPFQGH-PACVHIP--IGKVCGTAVSER--RTQIVADVHQFEGHIACDANSKSEIV  
 YP\_494359.1 GFYLL--EQN-----ELILGPFQGH-PACVHIP--IGKVCGTAVSER--RTQIVADVHQFEGHIACDANSKSEIV  
 YP\_500333.1 GFYLL--EQN-----ELILGPFQGH-PACVHIP--IGKVCGTAVSER--RTQIVADVHQFEGHIACDANSKSEIV  
 YP\_001332646.1 GFYLL--EQN-----ELILGPFQGH-PACVHIP--IGKVCGTAVSER--RTQIVADVHQFEGHIACDANSKSEIV  
 YP\_001575592.1 GFYLL--EQN-----ELILGPFQGH-PACVHIP--IGKVCGTAVSER--RTQIVADVHQFEGHIACDANSKSEIV  
 ZP\_02759966.1 GFYLL--EQN-----ELILGPFQGH-PACVHIP--IGKVCGTAVSER--RTQIVADVHQFEGHIACDANSKSEIV  
 YP\_001487827.1 GFYLAKEG-----DELVLGPFQGL-PACVRIP--SGKVCGTAFATG--EVQRIADVHAFPGHIACDAASQSEIV  
 YP\_417047.1 GFYLL--EQN-----ELILGPFQGH-PACVHIP--IGKVCGTAVSER--RTQVVDVHQFEGHIACDANSKSEIV  
 YP\_041183.1 GFYLL--EQN-----ELILGPFQGH-PACVHIP--IGKVCGTAVSER--RTQVVDVHQFKGHIACDANSKSEIV  
 YP\_176251.1 GFYFL--KEN-----ELVLGPFQGL-PACTRIA--IGKVCGTAVAEN--KTMRIDVHAFPGHIACDAASNAELV  
 YP\_002349929.1 GFYLLLEKETN-----QLVLGPFQGL-PACIRIP--LGVKCGSAAADQ--KTYIVENVHDFPGHIACDAASNSEIV  
 YP\_001376537.1 GFYVT--EGN-----ELVLGPFQGM-PACVRIP--FGRVCGVAAETK--TTQLVADVHQFPGHIACDSASNSEIV  
 YP\_784647.1 GFYFFDG-----QELVLGPFQGL-PACVRIP--LARGVCGAAASLR--QTQVVPDVHAFPGHIACDAASRSEIV  
 YP\_557760.1 GFYFHDG-----QELVVGPFQGL-PACVRIP--LGVKCGTAAQTR--QTQVVRDVHEFPGHIACDSASQSEIV  
 YP\_275769.1 GFYLLNRN-----EELVLGPFQGL-PACVRIP--FGRVCGAAAQSR--QTQVVRDVHEFPGHIACDSASNSEIV  
 YP\_001118914.1 GFYFFDG-----TELVVGPFQGL-PACVRIP--LGVKCGTAAQTR--QTQVVRDVHAFPGHIACDAASESEIV  
 YP\_001782545.1 GFYLLMKDG-----ELVLGPFQGM-PACDRIP--IGKVCGVAISSR--QIQRVDDVHKFEGHIACDSSTNSEIV  
 NP\_882192.1 GFYFHDG-----QELVLGPFQGL-PACVRIP--LSRVCGAAASQR--RTQVVPDVHAFPGHIACDAASRAEIV  
 YP\_001894915.1 GFYFHDG-----KELVVGPFQGL-PACVRIP--LGVKCGTAAQTR--QTQVVRDVREFPGHIACDSASQSEIV  
 YP\_001647268.1 GFYVT--EGN-----QLVLGPFQGM-PACVRIP--FGRVCGVAAETK--TTQLVADVHQFPGHIACDSASNSEIV  
 NP\_882465.1 GFYFHDG-----QELVLGPFQGL-PACVRIP--LSRVCGAAASQR--RTQVVPDVHAFPGHIACDAASRAEIV  
 YP\_002448219.1 GFYVT--EGN-----QLVLGPFQGM-PACVRIP--FGRVCGVAAETK--TTQLVADVHQFPGHIACDSASNSEIV  
 NP\_834359.1 GFYVT--EGN-----QLVLGPFQGM-PACVRIP--FGRVCGVAAETK--TTQLVADVHQFPGHIACDSASNSEIV  
 YP\_002369448.1 GFYVT--EGN-----QLVLGPFQGM-PACVRIP--FGRVCGVAAETK--TTQLVADVHQFPGHIACDSASNSEIV  
 YP\_191278.1 GFYLLWKEADR-----QLVLGPFQGR-LACTRIP--LGRVCGTVAQNR--ETLVVPDVHAFPGHIACDAASESEIV  
 NP\_886654.1 GFYFHDG-----QELVLGPFQGL-PACVRIP--LSRVCGAAASQR--RTQVVPDVHAFPGHIACDAASRAEIV  
 NP\_847103.1 GFYVT--EGN-----QLVLGPFQGM-PACVRIP--FGRVCGVAAETK--TTQLVADVHQFPGHIACDSASNSEIV  
 YP\_030799.1 GFYVT--EGN-----QLVLGPFQGM-PACVRIP--FGRVCGVAAETK--TTQLVADVHQFPGHIACDSASNSEIV  
 NP\_981083.1 GFYVT--EGN-----QLVLGPFQGM-PACVRIP--FGRVCGVAAETK--TTQLVADVHQFPGHIACDSASNSEIV  
 YP\_038702.1 GFYVT--EGN-----QLVLGPFQGM-PACVRIP--FGRVCGVAAETK--TTQLVADVHQFPGHIACDSASNSEIV  
 YP\_002340711.1 GFYVT--EGN-----QLVLGPFQGM-PACVRIP--FGRVCGVAAETK--TTQLVADVHQFPGHIACDSASNSEIV  
 YP\_085975.1 GFYVT--EGN-----QLVLGPFQGM-PACVRIP--FGRVCGVAAETK--ATQLVADVHQFPGHIACDSASNSEIV  
 YP\_002453717.1 GFYVT--EGN-----QLVLGPFQGM-PACVRIP--FGRVCGVAAETK--TTQLVADVHQFPGHIACDSASNSEIV  
 YP\_772921.1 GFYFFDG-----SELVVGPFQGL-PACVRIP--LGVKCGTAAQTR--ETQVVRDVHEFPGHIACDAASESEIV  
 YP\_001843726.1 GFYRVQDG-----ELILGPFQGL-PACVHIP--FGKVCGTAAQTG--KTQLVKDVHQFAGHIACDAASNSEIV  
 YP\_942902.1 GFYLL--KDN-----QLVLGPFQGL-PACIRIP--LNTGCGKAFSTN--TIQRVADVQQFVGHIAACDANSQSEIV

Supplemental data

YP\_121651.1 GFYFAVG-----DELVVCPFFQK-PACVRIA--FGKGCCTAAATR--TTQLVPDVHAFPGHIACDADSRSEIV  
 YP\_001633478.1 GFYFYDG-----RELVLCPFFQK-PACVRIA--LGRGCGTAAASQR--QTQVADVNAFPGHIACDVASRSEV  
 YP\_001392189.1 GFYLMKDG-----ELVLCPFFQGM-PACDRIK--IGKCGVAISSR--QIQRVDDVHKFEGHIACDSSSTNSELV  
 YP\_795394.1 GFYLYQPETD-----DLILCPFFQGN-VACVHIE--NNHCGTALATQ--TTQRIADVHQFPGHIACDASASNAEIV  
 YP\_002284153.1 GFYFLRSE-----NELVLCPFFQGR-VACVRIA--VGKCGTAVAEA--RSVLVPDVHEFPGHIACDAAASRSELV  
 YP\_001255404.1 GFYLMKDG-----ELVLCPFFQGM-PACNRIK--IGKCGVAISSR--QIQRVNDVHKFEGHIACDSSSTNSELV  
 YP\_001385170.1 GFYLMKDG-----ELVLCPFFQGM-PACNRIK--IGKCGVAISSR--QIQRVNDVHKFEGHIACDSSSTNSELV  
 YP\_001388639.1 GFYLMKDG-----ELVLCPFFQGM-PACNRIK--IGKCGVAISSR--QIQRVNDVHKFEGHIACDSSSTNSELV  
 YP\_001347703.1 GFYLNRN-----EELLCPFFQK-VACVRIP--FAKCGAAARTR--QTQRVEDVHAFPGHIACDASARSELV  
 NP\_103622.1 GFYFLASD-----EELVLCPFFQK-PACVRIA--VGKCGTAVQLG--TSMLIKDVHDFPGHIACDADSRSELV  
 YP\_001807739.1 GFYFFDG-----SELVCPFFQK-PACVRIA--LKGCGTAAQTR--ETQVVDVHEFPGHIACDAAESEIV  
 YP\_001580337.1 GFYFFDG-----TELVCPFFQK-PACVRIA--LKGCGTAAQTR--ETQVVDVHAFPGHIACDAAESEIV  
 YP\_002230176.1 GFYFFDG-----TELVCPFFQK-PACVRIA--LKGCGTAAQTR--ETQVVDVHDFPGHIACDAAESEIV  
 NP\_251512.1 GFYLNRN-----EELVLCPFFQK-VACVRIP--FSKCGAAARTR--LTQRVDVHAFPGHIACDASASSELV  
 YP\_459505.1 GFYRVVD-----GELVLCPFFQGR-PACIRIP--IQCGAAASSG--ETQLVEDVHAFPGHIACDAAASQSELV  
 YP\_790351.1 GFYLNRN-----EELVLCPFFQK-VACVRIP--FSKCGAAARTR--LTQRVDVHAFPGHIACDASASSELV  
 YP\_002439846.1 GFYLNRN-----EELVLCPFFQK-VACVRIP--FSKCGAAARTR--LTQRVDVHAFPGHIACDASASSELV  
 YP\_001970489.1 GFYLYDG-----KELVCPFFQGL-PACVRIP--LDKCGAAASQR--VTQRVEDVDAFPGHIACDASARSELV  
 YP\_617023.1 GFYRFDG-----QELVLCPFFQK-AACIRIP--LDKCGAAARLR--ATQRVEDVHAFPGHIACDADSRSELV  
 YP\_620554.1 GFYFFDG-----TELVCPFFQK-PACVRIA--LKGCGTAAQTR--ETQVVDVHDFPGHIACDAAESEIV  
 YP\_834795.1 GFYFFDG-----TELVCPFFQK-PACVRIA--LKGCGTAAQTR--ETQVVDVHDFPGHIACDAAESEIV  
 YP\_148653.1 GFYLA--DGE-----ELVLCPFFQGL-PACVRIP--FGKCGTAAAKR--RTVVVPDVHQFPGHIACDAAASQSEIV  
 YP\_442277.1 GFYFFDG-----RELVCPFFQK-PACVRIP--LKGCGTAAQTR--GTQVVHDVHAFAGHIACDASARSEIV  
 YP\_334263.1 GFYFFDG-----RELVCPFFQK-PACVRIP--LKGCGTAAQTR--GTQVVHDVHAFAGHIACDASASQSEIV  
 YP\_001067073.1 GFYFFDG-----RELVCPFFQK-PACVRIP--LKGCGTAAQTR--GTQVVHDVHAFAGHIACDASASQSEIV  
 YP\_368503.1 GFYFFDG-----TELVCPFFQK-PACVRIA--LKGCGTAAQTR--ETQVVDVHDFPGHIACDAAESEIV  
 YP\_109010.1 GFYFFDG-----RELVCPFFQK-PACVRIP--LKGCGTAAQTR--GTQVVHDVHAFAGHIACDASASQSEIV  
 YP\_993758.1 GFYFFDG-----RELVCPFFQK-PACVRIP--LKGCGTAAQTR--GTQVVHDVHAFAGHIACDASASQSEIV  
 YP\_001028775.1 GFYFFDG-----RELVCPFFQK-PACVRIP--LKGCGTAAQTR--GTQVVHDVHAFAGHIACDASASQSEIV  
 YP\_002026852.1 GFYLYDG-----KELVCPFFQGL-PACVRIP--LDKCGAAASQR--VTQRVDVDAFPGHIACDASARSELV  
 YP\_001764423.1 GFYFFDG-----TELVCPFFQK-PACVRIA--LKGCGTAAQTR--ETQVVDVHDFPGHIACDAAESEIV  
 NP\_970249.1 GFYLLHNN-----ELLSSFFQGL-PACTRIA--IGKCGTAAKTL--QTQLVADVDFPGHIVCDAAASKSEIV  
 YP\_001059788.1 GFYFFDG-----RELVCPFFQK-PACVRIP--LKGCGTAAQTR--GTQVVHDVHAFAGHIACDASASQSEIV  
 YP\_001081316.1 GFYFFDG-----RELVCPFFQK-PACVRIP--LKGCGTTAQTR--GTQVVHDVHAFAGHIACDASASQSEIV  
 YP\_001875000.1 GFYILKG-D-----KLVLCPFFQK-PACVRIS--LKGCGVSARER--KTLVSDVHEFPGHIACDASASQSEIV  
 YP\_278248.1 GFYLAEGE-----VLYLSSFFQK-IACIQIP--FSRGGKAAAREQ--KTIVVDVHEFKDGHIACDASANSSEIV  
 YP\_001309672.1 GFYLVKNN-----TLVLCPFFQGM-PACTKIE--IGKCGKAAALEK--ETLLVKDVHNFEGHIACDAAANSSEIV  
 YP\_001576818.1 GVYRFENG-----ELILCPFFQGM-PACVHIQ--MKGCGTAAQTE--KTQIVPNVHEFQGHIACDASANSSEIV  
 YP\_193206.1 GVYRLENG-----ELILCPFFQGM-PACVHIP--VGKCGVAAKTQ--ITQIVPNVHEFAGHIACDASANSSEIV  
 YP\_199405.1 GFYFYDG-----RELVCPFFQGL-PACVRIP--LDKCGAAASTR--QSQRIADVDAFPGHIACDASARSELV  
 YP\_001915608.1 GFYFYDG-----RELVCPFFQGL-PACVRIP--LDKCGAAASTR--QSQRIADVDAFPGHIACDASARSELV  
 YP\_002509654.1 GFYLMR-G-----GELVLCPFFQGL-PACVRIK--VGRGCGSAVRDR--KTYLVPDVHKFPGHIACDSEASRSEIV

Supplemental data

YP\_757341.1 GFYEVDPAKP-----TELVVCPYCGT-MGCLRIP--FGRGCGAAATG--ETQLVEDVHAFPGHIACD SRSNSEIV  
 YP\_810624.1 TYYRLKNG-----ELILGPFQ GK-PACVHIP--LGRGCGTAAALK--KTVIVSNVHKFEFHIACDKDSNSEIV  
 YP\_244708.1 GFYFYDG-----RELVVCPFGQL-PACVRIP--LDKGCGAAASTR--QTQRIADVDAFPGHIACD SASRSELV  
 NP\_635978.1 GFYFYDG-----RELVVCPFGQL-PACVRIP--LDKGCGAAASTR--QTQRIADVDAFPGHIACD SASRSELV  
 XP\_505859.1 GFYVIDPKKSE-----QLILGPFHQ-VACQEIP--LKGCGVAAKEQ--KTQLVKNVEEFPGHIACDGVTKSEIV  
 NP\_964546.1 GVYRYENQ-----ELILGPFQ GK-PACVHIQ--IGKCGTAAKEK--QTQIVKNVHEFAGHIACDSESNSEIV  
 YP\_001261873.1 GFYRAIG-----QELVLGPFQ GK-TACIRIP--FKGCGTAAADTR--TAQCVDVHEFPGHIACDAYSASEIV  
 YP\_814311.1 GVYRYKNH-----ELILGPFQ GK-PACVHIA--IGKCGTTAKER--QTQIVKNVHEFAGHIACDSDSNSEIV  
 NP\_298520.1 GFYFYDG-----RELVVCPFGQL-PACIRIP--LDKGCGTAAARTR--RTQRIDVDVTFPDHIACD SASRSELV  
 YP\_001775202.1 GFYFYDG-----RELVVCPFGQL-PACIRIP--LDKGCGTAAARTQ--RTQRIDVDVTFPDHIACD SASRSELV  
 YP\_001829224.1 GFYFYDG-----RELVVCPFGQL-PACIRIP--LDKGCGAAARTQ--RTQRIDVDVTFPDHIACD SASRSELV  
 NP\_778732.1 GFYFYDG-----RELVVCPFGQL-PACIRIP--LDKGCGAAARTQ--RTQRIDVDVTFPDHIACD SASRSELV  
 NP\_246070.1 GFYLVKDG-----VLKVLGPFQ GK-VACSDIG--FKGCGYTWTQTG--TTTVVDVHVFAGHIACD SASQSEV  
 XP\_645637.1 GFYLVDTEN-----ELVLAPFG GP-IACRIR--KGRGCGTAAWQQE--KTLIVPDVEKFPGHIACDSSLSKSEIV  
 XP\_456263.1 GFYLTRRENKK-----ELILGPFQ GK-VACQLIQ--FKGCGTAAASSQ--QTQLVPDVENFPGHIACDGETKSEIV  
 YP\_001300883.1 GFYLVKDD-----QLILGPFQ GS-TACYRIH--KKGCGTAWAEA--RTLIVPNVEQFPGHIACDSSLSRSEIV  
 YP\_812434.1 GVYRFKKG-----ELILGPFQ GM-PACVHIQ--LKGCGTAAALEK--KTQIVANVHDFPGHIACD SASNSEIV  
 NP\_814796.1 GYVLYK-----DEELVLGPFQ GK-VSCTRIK--MKGCGESAQEK--ATLIVDNVKTHANYISCD SAAMSEIV  
 NP\_358362.1 GFYLFDF-----GKELVLGPFQ GK-VSCTIRIA--LKGCGEAAHFQ--ETVIVGDVTTYLNYISCD SLAKSEIV  
 YP\_816246.1 GFYLFDF-----GKELVLGPFQ GK-VSCTIRIA--LKGCGEAAHFQ--ETVIVGDVTTYLNYISCD SLAKSEIV  
 YP\_001694316.1 GFYLFDF-----GKELVLGPFQ GK-VSCTIRIA--LKGCGEAAHFQ--ETVIVGDVTTYLNYISCD SLAKSEIV  
 YP\_001835526.1 GFYLFDF-----GKELVLGPFQ GK-VSCTIRIA--LKGCGEAAHFQ--ETVIVGDVTTYLNYISCD SLAKSEIV  
 YP\_002037500.1 GFYLFDF-----GKELVLGPFQ GK-VSCTIRIA--LKGCGEAAHFQ--ETVIVGDVTTYLNYISCD SLAKSEIV  
 NP\_345351.1 GFYLFDF-----GKELVLGPFQ GK-VSCTIRIA--LKGCGEAAHFQ--ETVIVGDVTTYLNYISCD SLAKSEIV  
 XP\_001385863.2 GFYVKNGEKNE-----LILGPFQ GK-VACQIIQ--IGKCGTAAHASK--ETQLVPDVEKFPGHIACDGETKSEIV  
 NP\_985662.1 GFYITEKDDPN-----MLLILGPFQ GK-VACQRIQ--FGRGCGTAAALTQ--EVQVVPDVTVYPGHIACDGDTKSEIV  
 YP\_759928.1 GFYLVDP LKP-----QELVVCPYCGT-LGCLRIP--FKGCGHVAATQ--APVIVPDVHEFPGHIACD SASNSEIV  
 YP\_002123053.1 GFYLFDF-----GQELILGPFQ GK-VSCTVHIK--LKGCGEAAQSG--QTIIVDVVRKHANYISCD SAAMSEIV  
 YP\_002131343.1 GFYVVDPAKG-----DELVVCPYCGT-LGCLRIA--FGRGCGAAATR--QTQLVEDVHAFPGHIACD SRSASEIV  
 XP\_001683506.1 GFYLFQAPG-----LLALGPFQ GR-PACTEIR--VKGCGTVAESG--ESMVVQSVHEFPGHIACD SASKSEIA  
 NP\_012854.1 GFYVTQASEEN-----TLILGPFQ GK-VACQMIQ--FKGCGTAAASTK--ETQIVPDVNKYPGHIACDGETKSEIV  
 XP\_460154.1 GFYVLNEPRTD-----ELILGPFQ GK-VACQIIK--FKGCGNAASSA--KTQLVPNVNEYPGHIACDGETQSEIV  
 XP\_001801028.1 GFYFTDPSNP---AK-----LILGPFQ GQ-VACQTIL--FNRCGTAATQ--TTQLVADVDFKFPGHIACDGASKSEIV  
 YP\_001201197.1 GFYLYD-----GSELILGPFQ GK-VSCTVHIA--LKGCGEVAAKR--QTILVDVURLHDNYISCDATALSEIV  
 XP\_001484046.1 GFYVINPEKQN-----ELILGPFQ GK-VACQTIE--FKGCGNAASSK--NTQLVKNVNEYPGHIACDGDTQSEIV  
 NP\_274882.1 GFYLVDTRS-----DELVLAPFG GP-LACTRIP--FGRGCGQAWAKG--ETVVVDVNAHPDHIACDSSLSRSEIV  
 YP\_001302571.1 GFYRVIDN-----QLVLAPFG GP-IACRIR--YKGCCTAAWKET--RTIIVPDVDAFPGHIACDSSASRSEIV  
 YP\_002000650.1 GFYLVDTRS-----DELVLAPFG GP-LACTRIP--FGRGCGQAWAKG--ETVVVDVNAHPDHIACDSSLSRSEIV  
 YP\_001682978.1 GFYVVDPLKD-----RELVVCPYCGT-LGCLRIA--YGRGCGAAAETG--QTQLVEDVHAFPGHIACD SRSQSEIV  
 YP\_002342048.1 GFYLVDTRS-----DELVLAPFG GP-LACTRIP--FGRGCGQAWAKG--GTVVVDVDAHPDHIACDSSLSRSEIV  
 YP\_207199.1 GFYFVDTRS-----DELVLAPFG GP-LACTRIP--FGRGCGQAWAKG--ETVVVDVNAHPDHIACDSSLSRSEIV  
 XP\_844799.1 GFYLMHGPE-----LLALGPFQ GR-PACTEIK--MGRGCGTAAQQA--KTLVVDVHEFPGHIACD SASNSEIV

Supplemental data

YP\_001598496.1 GFYLVDRS-----DELVLAPFQGP-LACTRIP--FGRGCGQAWAKG--GTVVVGVDADHPDHIACSSLSRSEIV  
 YP\_974447.1 GFYLVDRS-----DELVLAPFQGP-LACTRIP--FGRGCGQAWAKG--GTVVVGVDADHPDHIACSSLSRSEIV  
 XP\_001465858.1 GFYLFQAPG-----LLALGPFQGR-PACTEIR--VKGCGTVAESG--EPLVVQSVHEFPGHIACDSASKSEIA  
 YP\_001280815.1 GFYRVDSA-----NQLILGPFQGP-LACTRIP--HGKCGEVWATG--TTQIVDDVNAHPNHIACSSLSQSEIV  
 NP\_664843.1 GFYLFDF-----GQELILGPFQGR-VSCVHIK--LKGCGESAQSR--RTIIINDVKQHANYISCDAAAMSEIV  
 NP\_802083.1 GFYLFDF-----GQELILGPFQGR-VSCVHIK--LKGCGESAQSR--RTIIINDVKQHANYISCDAAAMSEIV  
 YP\_280574.1 GFYLFDF-----GQELILGPFQGR-VSCVHIK--LKGCGESAQSR--RTIIINDVKQHANYISCDAAAMSEIV  
 YP\_001128311.1 GFYLFDF-----GQELILGPFQGR-VSCVHIK--LKGCGESAQSR--RTIIINDVKQHANYISCDAAAMSEIV  
 YP\_002286076.1 GFYLFDF-----GQELILGPFQGR-VSCVHIK--LKGCGESAQSR--RTIIINDVKQHANYISCDAAAMSEIV  
 XP\_390238.1 GFYVLDKSSKD--PQ-----LILGPFQGK-VACQTIK--FKGCGTAATH--ETQLVRDVEEFPGHIACDGDSEIV  
 XP\_001565241.1 GFYLFQAPG-----LLALGPFQGR-PACTEIR--VKGCGTVAESG--ESLVVSNVEEFPGHIACDSSSKSEVA  
 YP\_596891.1 GFYLFDF-----GQELILGPFQGR-VSCVHIK--LKGCGESAQSR--RTIIINDVKQHANYISCDAAAMTEIV  
 YP\_600772.1 GFYLFDF-----GQELILGPFQGR-VSCVHIK--LKGCGESAQSR--RTIIINDVKQHANYISCDAAAMTEIV  
 YP\_001351938.1 GFYRVQK-----DELVLGPFQGP-LACTRIA--KKGCGSAWQQA--ATIVVPDQVFPGHIACSSLSRSEIV  
 XP\_001910908.1 GFYVHDHTSPPTKPR-----LILGPFQGK-VACQTIK--FGRGCGTAATQ--TTQLVPDVEQFPGHIACDSSSKSEIV  
 XP\_446236.1 GFYIRNGE-KE-----QLLILGPFQGK-VACQTIK--FGRGCGIAASSQ--ETQLVPDVDKFPGHIACDGETKSEIV  
 NP\_607473.1 GFYLFDF-----GQELILGPFQGR-VSCVHIK--LKGCGESAQSR--RTIIINDVKQHANYISCDAAAMSEIV  
 YP\_060405.1 GFYLFDF-----GQELILGPFQGR-VSCVHIK--LKGCGESAQSR--RTIIINDVKQHANYISCDAAAMSEIV  
 YP\_602707.1 GFYLFDF-----GQELILGPFQGR-VSCVHIK--LKGCGESAQSR--RTIIINDVKQHANYISCDAAAMSEIV  
 NP\_269471.1 GFYLFDF-----GQELILGPFQGR-VSCVHIK--LKGCGESAQSR--RTIIINDVKQHANYISCDAAAMSEIV  
 YP\_282476.1 GFYLFDF-----GQELILGPFQGR-VSCVHIK--LKGCGESAQSR--RTIIINDVKQHANYISCDAAAMSEIV  
 YP\_598792.1 GFYLFDF-----GQELILGPFQGR-VSCVHIK--LKGCGESAQSR--RTIIINDVKQHANYISCDAAAMSEIV  
 YP\_099090.1 GFYLVKQD-----QLVLGPFQGP-VACTRIR--KKGCGTAWQES--ATLLVPDVEVFPGHIACSSLSRSEIV  
 NP\_421082.1 GFYVVDPTKE-----RELVVCPYGT-LGGLRIA--FGRGCGAAATG--QTQLVPDVHAFPGHIACDGRSQSEIV  
 YP\_001034962.1 GFYLFDF-----GKELILGPFQGG-VSCVHIT--LKGCGESAQSR--QTIIVDDVTQHANYISCDRAKSEIV  
 YP\_211509.1 GFYLVKQD-----QLVLGPFQGP-VACTRIR--KKGCGTAWQEG--ATLLVPDVEVFPGHIACSSLSRSEIV  
 XP\_001940256.1 GFYFTDPAKE---TR-----LLLGPFQGQ-VACQSIA--FGRGCGTAAKEA--KTQLVEDVDKFPGHIACDGKSRSEIV  
 YP\_001450196.1 GFYLFDF-----GSELILGPFQGG-VSCVHIT--LKGCGESAQSR--QTIIVDDVTQHANYISCDRAKSEIV  
 XP\_680937.1 GFYIRQDQFPSKETAESTEAAARVKE---TLWLGPFGGR-PACQEIR--FGRGCGAAAKR--ETVVVVDVLEFPGHIACDASSRSEIV  
 XP\_001265696.1 GFYIRQDKFP-ALGSQNTSPSNSTNN---LLLGPFGGR-PACQEIR--FGRGCGTAAEKR--ETVIVVDVLSFPGHIACDASSRSEIV  
 XP\_367405.1 GFYTLDPSSATR-QQ-----LILGPFQGK-VACQTIK--FGRGCGAAAQK--QTQLVADVDKFPGHIACDADSRSEIV  
 YP\_001033719.1 GFYLYN-----GDKLILGPFQGS-VSCVEIV--MKGCGEAAQTR--QTMIVEDVKKHKNYISCDGHAMSEIV  
 YP\_812051.1 GFYLYN-----GDKLILGPFQGS-VSCVEIV--MKGCGEAAQTR--QTMIVEDVKKHKNYISCDGRAMSEIV  
 NP\_810723.1 GFYLVVEGN-----ELVLAPFQGP-IACTRIR--FGRGCGTAWKEA--QTLIVPDVEQFPGHIACSSDSKSEIV  
 YP\_141537.1 GFYLMNDI-----KNELILGPFQGN-VSCVRIA--LKGCGQSAEEN--RTLIVQDVTKHANYIACDSAARSEIV  
 NP\_721920.1 GFYLFDF-----GEELVLGPFQGG-VSCVRIA--LKGCGQAAAKK--QTLIVGDVTKHDNYISCDAAAMSEIV  
 YP\_820528.1 GFYLMNDI-----KNELILGPFQGN-VSCVRIA--LKGCGQSAEEN--RTLIVQDVTKHANYIACDSAARSEIV  
 XP\_001246405.1 GFYVRKDKSPSSGVSTASDAKN-----ILLGPFQHGK-PACQLIP--FGRGCGTAAASKR--ETVIVSDVLEWEGHIACDADSRSEIV  
 YP\_612063.1 GFYRVTEP-----EVLKICPYCG-HGCLVIP--FARGCGAAARLN--ETQLVDVDAFPGHIACSSSTRSEIV  
 YP\_444835.1 GFYRAVS--D-----DELLVCPYCG-HGCLHID--VDRGCGAAARTR--ETQLWPDVSKAPDHIACQSSTQSEIV  
 NP\_943356.1 -----LFLDHSREN-IACARIP--VSGCGTAAVAEE--RILCINNVSFNHGHIACDTASNSEIV  
 YP\_631535.1 GFYRVVTPG-----RLLRVCPYCG-HGCLVIP--FKGCGASAAKG--ESVVVADVHAFPGHIACDGRSASEIV

Supplemental data

NP\_687842.1 GFYLFDF-----GEELILGPFQGG-VSCVHIT--LKGKCGESAQTA--KTLIVD DVTKHANYISCD SKAMSEIV  
 YP\_329573.1 GFYLFDF-----GEELILGPFQGG-VSCVHIT--LKGKCGESAQTA--KTLIVD DVTKHANYISCD SKAMSEIV  
 XP\_001692446.1 GFYQAGPPGD-----DTLVLGPFQGH-MGCLRIP--YSRGC GA AARTK--TSQLVP DVSQFPGYTACASSTRSEV  
 NP\_390842.2 GFYFAK-EED-----GQLVLGPFQGL-PACVRIP--FGRGC GA AYANG--KVERIE DVNAFPGHIACDAASQSEIV  
 YP\_511991.1 GFYRVTEP-----DLLKIGPFQGG-HGCLQIP--FSKGC GA AARTG--QTQLVP DVDAFPGHIACASSTRSEIV  
 XP\_719233.1 GFYLTVENKNEGQTSPT-----ELILGPFQGG-VACQLIK--FCHGCGT AASKK--LTQLVP DVEKFPGHIACDGETKSEIV  
 NP\_735295.1 GFYLFDF-----GKELILGPFQGG-VSCVHIT--LKGKCGESAQTA--KTLIVD DVTKHANYISCD SKAMSEIV  
 YP\_168601.1 GFYRVTEP-----GVLKIGPFQGG-HGCLRIP--FDKGC GA AASTG--EVQLVP DVDAFPGHIACASSTRSEIV  
 YP\_001169098.1 GFYRVTEP-----EVLKIGPFQGS-HGCLVIP--FARGCGA AARTG--EIQLVP DVEAFPDHIACSSSTRSEIV  
 XP\_001216799.1 GFYIRQDKFP-VLSSTSQDTPKKDD---ILLGPFQGR-PACQEIR--FGRGC GA AAQKR--ETVVVP DVLNFPGHIACDASSRSEIV  
 YP\_437091.1 GFYRVVAH-----ELMKVGPYQGG-HGCLTIP--FSRGC GA AAREQ--KVQLVS DVNEFPGHIACSSTTQSEIV  
 XP\_001390389.1 GFYIRQDKFP-VLGAPLEEDSKKKP---VLLGPFQGR-PACQEIR--FGRGC GA AAEKR--ETVVVP DVLNFPGHIACDASSRSEIV  
 XP\_001550500.1 -----LILGPFQGG-VACQTIA--FSRGC GA AASTQ--TTQLVADVEKFPGHIACDAASQSEIV  
 XP\_001273080.1 GFYIRQDKFPQPASTTSSSTTEPPENLLLLLILGPFQGR-PACQEIR--FGRGC GA AAEQR--QTVLVP DVHAFPGHIACDASSRSEIV  
 YP\_001042044.1 GFYRVTEP-----ELLKIGPFQGA-HGCLVIP--FSRGC GA AARTG--RIQLVP DVEAFPDHIACSSSTRSEIV  
 YP\_916587.1 GFYRVTEP-----ELLKIGPFQGG-HGCLVIP--FSRGC GA AARTG--QVQLVP DVDAFPGHIACASSTRSEIV  
 XP\_961529.1 -----GPFQGG-VACQTIA--FGRGC GA AATK--TTQLVP DVDAFPGHIACDGD SKSEIV  
 YP\_351544.1 GFYRVTEP-----ELLKIGPFQGA-HGCLVIP--FSRGC GA AARTG--RIQLVP DVEAFPDHIACSSSTRSEIV  
 XP\_001588803.1 -----LILGPFQGG-VACQTIA--FSRGC GA AASTQ--TTQLVADVEKFPGHIACDAASQSEIV  
 XP\_762195.1 GFYLLSPLL PSEIVSPKRRKHP-----TLLIGPENGL-PACQLIVSVP GKG CADASAVLPPRVVRA DTDAYPGHIACDSL SKSEIV  
 XP\_001537789.1 GFYVRQDRFP-SLVSAGSNTKETPGTQ-ALLIDPEHGK-PACQLIQ--FGRGC GA AAEKQ--ETVLVP DVFNWEGHIACDAESKSEIV  
 YP\_001198994.1 GFYLYD-----GSELILGPFQGG-VSCVHIA--LKGKCGEVAAKR--QTILVHDVRLHDNYISCDATVP----  
 NP\_390842.1 GFYFAK-EED-----GQLVLGPFQGL-PACVRIP--FGRGC GA AYANG--KVERIE DVNAFPGHIACDAASQSEIV  
 YP\_001469780.1 GFYLTDFD-----EKNTLVGPFVGEPTTEHVKIP--FGKGC GA AAEK--TTFIVQ DVSKETNYLSCSPKVKSEIV  
 NP\_623333.1 GFYFMK-----DGELVIGPFVGRPTTEHVRIK--VQGGVGR AVAEK--STIIVD DVTKEDNYLACSL ETKSEIV  
 YP\_001567589.1 GFYLVDF-----ETEDNSLVGPFVGEPTTEHTKIK--FGQGC GA AASTK--TTFVVD DVSKEDNYLSCSPKTQSEIV  
 NP\_228329.1 GFYFVE-----DGKLVGPFVGEPTTEHVEIP--FVGIC GA AERE--ETFVVD DVSKETNYLSCSPKTKAEIV  
 YP\_001244004.1 GFYFVE-----DGKLVGPFVGEPTTEHVEIP--FVGIC GA AERE--ETFVVD DVSKETNYLSCSPKTKAEIV  
 YP\_001738457.1 GFYFVE-----DGKLVGPFVGEPTTEHVEIP--FVGIC GA AERE--ETFVVD DVSKETNYLSCSPKTKAEIV  
 YP\_591728.1 GFYMIEKSL-----PGVDPVLVGPYVGAETHTTRIP--LNEGIC GA AVTTG--DTVIVD DVNSDPRYLACSL ETKSEIV  
 YP\_001193798.1 GFYFANL-----ENKTLHLGPFVGAETDHTVIP--FGKGC GA QVAESN--ANFVVP DVKAQDNYLACSLTVKSEIV  
 YP\_001296902.1 GFYFANH-----ETKTLHLGPFVGAETDHTVIP--FGKGC GA QVAVSN--ENFVVP DVAAQDNYLACSF TVKSEIV  
 XP\_001439866.1 GFYEVIDG-----NSLEVGPYQST-ILATPRIE-KKGC QGCWAEG--KVQIQE DVKVCQNYLACDNETQSEIV  
 XP\_001438779.1 GFYQVIDGI-----LIDSILDNHLEVPYQST-ILATPRIE-KKGC QGCWAEG--KVQIQE DVKVCQNYLACDNETQSEIV  
 YP\_001319456.1 GFYMIE-----NGE---LVLGHYLGAHTDHTIQ--IQGGIC GA AADRK--ETFIVD DVTKETNYLACSF ETASEIV  
 XP\_001022412.1 GFYVVVDELDS-----QGKNTGNKVLEVPYQST-ILATPRIA-IGKVC GA AWQEA--KTQVNNVKECKNYLACDNETLSEIV  
 YP\_001306613.1 GFYMIND-----EGLLELYDFVGEPTTEHVKIK--ICEGIC GA ANLK--RTFIVQ DVSKETNYLSCSPKVKSEIV  
 YP\_002335308.1 GFYMINK-----DNVLELFEVGEPTTEHVKIN--ICEGIC GA AMLK--DVFIVQ DVSKETNYLSCSPKVKSEIV  
 NP\_394308.1 GFYVLEH-----GKLVLEAVGEEKTDHVEIN--LGDGLCSL AVLKN--DIVNEY DVKSNPKYLACFPSTQSEIV  
 YP\_862969.1 GFYFKNG-----NKEELKLSVAGEPTDHEIIP--FGRGC GA QVAVSN--KNFVVP DVKAQNNYLACSIHVKAIEIV  
 YP\_023758.1 GVYVVNN-----GNLSLISYSKGRTEHEIIN--LGSGLCSL AVTKR--MIINEG DVRSNSDYLACFPETNSEIV  
 NP\_111339.1 GVYVMEN-----RKLKLEAVGEEKTEHEVIN--LGDGLCSL AVLKN--EVVNEY DVKSNPKYLACFPSTQSEIV

Supplemental data

YP\_001380982.1 YLYVLRG-----DVLELDAGRETPHVRTIP--VQQLCGLSARTR--EVLVLDVAADPRYLACNLETRSEIV  
 YP\_806472.1 GFYLYNDKGTG-----QLDLGPFQGGK-VACMHIQ--PENGIVGTSYAQN--AVLRVNVHEFAGHICDSASNAEIV  
 YP\_001987415.1 GFYLYNDKGTG-----QLDLGPFQGGK-VACMHIQ--PENGIVGTSYAQN--AVLRVNVHEFTGHICDSASNAEIV  
 NP\_785802.1 GFYLFNEQGTG-----ELDLGPFQGGK-VACMHIK--VAGVVGTAFFETQ--TNQRVADVHQFPGHICDSASNSEIV  
 YP\_818384.1 GFYIYNDDAK-----ELDLGPFQGGK-VACMHIK--PGSGVGTAFANK--ESIVVNVVHDFAGHICDADSNSSELV  
 YP\_001621174.1 GFYMYKNG-----ILTLGPFQGGK-VACNLM--PKGVVGTSYSKN--EVIVVKNVHEIENHITCDPISMSSETV

|                | 130           |     | 140     |        | 150        |             | 160 |  | 170 |
|----------------|---------------|-----|---------|--------|------------|-------------|-----|--|-----|
| NP_288269.1    | LPLVV-KN----- | QII | GVLDIDS | STVFGR | STDEDEEQG- | LRQLVAQLEK  | VLA |  |     |
| YP_002403065.1 | LPLVV-KN----- | QII | GVLDIDS | STVFGR | STDEDEEQG- | LRQLVAQLEK  | VLA |  |     |
| YP_002397981.1 | LPLVV-KN----- | QII | GVLDIDS | STVFGR | STDEDEEQG- | LRQLVAQLEK  | VLA |  |     |
| YP_002412850.1 | LPLVV-KN----- | QII | GVLDIDS | STVFGR | STDEDEEQG- | LRQLVAQLEK  | VLA |  |     |
| YP_001880631.1 | LPLVV-KN----- | QII | GVLDIDS | STVFGR | STDEDEEQG- | LRQLVAQLEK  | VLA |  |     |
| YP_002391608.1 | LPLVV-KN----- | QII | GVLDIDS | STVFGR | STDEDEEQG- | LRQLVAQLEK  | VLA |  |     |
| YP_001730808.1 | LPLVV-KN----- | QII | GVLDIDS | STVFGR | STDEDEEQG- | LRQLVAQLEK  | VLA |  |     |
| ZP_03003290.1  | LPLVV-KN----- | QII | GVLDIDS | STVFGR | STDEDEEQG- | LRQLVAQLEK  | VLA |  |     |
| YP_001743413.1 | LPLVV-KN----- | QII | GVLDIDS | STVFGR | STDEDEEQG- | LRQLVAQLEK  | VLA |  |     |
| YP_002407226.1 | LPLVV-KN----- | QII | GVLDIDS | STVFGR | STDEDEEQG- | LRQLVAQLEK  | VLA |  |     |
| YP_002329476.1 | LPLVV-KN----- | QII | GVLDIDS | STVFGR | STDADEEQG- | LRQLVAQLEK  | VLA |  |     |
| YP_002382399.1 | LPLVV-ED----- | QII | GVLDIDS | STQFGR | STEEDEEQG- | LRLLVTELEK  | VLA |  |     |
| ZP_03445135.1  | LPLVV-KN----- | QII | GVLDIDS | STVFGR | STDEDEEQG- | LRQLVAQLEK  | VLA |  |     |
| YP_688895.1    | LPLVV-KN----- | QII | GVLDIDS | STVFAR | STDEDEEQG- | LRQLVAQLEK  | VLA |  |     |
| YP_669680.1    | LPLVV-KN----- | QII | GVLDIDS | STVFGR | STDEDEEQG- | LRQLVAQLEK  | VLA |  |     |
| NP_416346.4    | LPLVV-KN----- | QII | GVLDIDS | STVFGR | STDEDEEQG- | LRQLVAQLEK  | VLA |  |     |
| ZP_02903917.1  | LPLAV-KN----- | QII | GVLDIDS | STVFSR | STGEDEEQG- | LRQLVAQLEK  | VLA |  |     |
| ZP_03282954.1  | LPLVV-KG----- | QIM | GVLDIDS | STDFGR | STAEDEEQG- | LRELVANLENV | VLA |  |     |
| YP_001452718.1 | LPLTV-DN----- | QII | GVLDIDS | STVFGR | STEEDEEQG- | LRELVARLET  | VLA |  |     |
| YP_001570142.1 | LPVAV-GK----- | KII | GVLDIDS | STAFGR | STEEDEHG-  | LRTLVAQLET  | VLA |  |     |
| NP_460803.1    | LPVTV-GE----- | RII | GVLDIDS | STAFGR | STEEDEHG-  | LRTLVAQLET  | VLA |  |     |
| YP_150310.1    | LPVTV-GE----- | RII | GVLDIDS | STAFGR | STEEDEHG-  | LRTLVAQLET  | VLA |  |     |
| YP_002141797.1 | LPVTV-GE----- | RII | GVLDIDS | STAFGR | STEEDEHG-  | LRTLVAQLET  | VLA |  |     |
| YP_002243298.1 | LPVTV-GE----- | RII | GVLDIDS | STAFGR | STEEDEHG-  | LRTLVAQLET  | VLA |  |     |
| NP_456352.1    | LPVTV-GE----- | RII | GVLDIDS | STAFGR | STEEDEHG-  | LRTLVAQLET  | VLA |  |     |
| NP_804849.1    | LPVTV-GE----- | RII | GVLDIDS | STAFGR | STEEDEHG-  | LRTLVAQLET  | VLA |  |     |
| YP_001587603.1 | LPVTV-GE----- | RII | GVLDIDS | STAFGR | STEEDEHG-  | LRTLVAQLET  | VLA |  |     |
| ZP_02666379.2  | LPVTV-GE----- | RII | GVLDIDS | STAFGR | STEEDEHG-  | LRTLVAQLET  | VLA |  |     |
| ZP_02832604.2  | LPVTV-GE----- | RII | GVLDIDS | STAFGR | STEEDEHG-  | LRTLVAQLET  | VLA |  |     |
| YP_001177122.1 | LPLSV-NN----- | QII | GVLDIDS | STAFGR | STDEDEEQG- | LRELVANLENV | VLN |  |     |
| YP_002226291.1 | LPVTV-GE----- | RII | GVLDIDS | STAFGR | STEEDEHG-  | LRTLVAQLET  | VLA |  |     |
| NP_754135.1    | LPLVV-KN----- | QII | GVLDIDS | STVFGR | STDEDEEQG- | LRQLVAQLEK  | VLA |  |     |
| ZP_02347214.1  | LPVTV-GE----- | RII | GVLDIDS | STAFGR | STEEDEHG-  | LRTLVAQLET  | VLA |  |     |

Supplemental data

|                |                  |         |        |          |               |
|----------------|------------------|---------|--------|----------|---------------|
| ZP_02574893.1  | LPVTV-GE-----RII | GVLDIDS | STAFGR | STEEDEHG | LRTLVAQLETVLA |
| ZP_02659310.1  | LPVTV-GE-----RII | GVLDIDS | STAFGR | STEEDEHG | LRTLVAQLETVLA |
| ZP_02663512.1  | LPVTV-GE-----RII | GVLDIDS | STAFGR | STEEDEHG | LRTLVAQLETVLA |
| ZP_02681881.1  | LPVTV-GE-----RII | GVLDIDS | STAFGR | STEEDEHG | LRTLVAQLETVLA |
| ZP_02696584.1  | LPVTV-GE-----RII | GVLDIDS | STAFGR | STEEDEHG | LRTLVAQLETVLA |
| YP_002041101.1 | LPVTV-GE-----RII | GVLDIDS | STAFGR | STEEDEHG | LRTLVAQLETVLA |
| YP_002045892.1 | LPVTV-GE-----RII | GVLDIDS | STAFGR | STEEDEHG | LRTLVAQLETVLA |
| ZP_03075263.1  | LPVTV-GE-----RII | GVLDIDS | STAFGR | STEEDEHG | LRTLVAQLETVLA |
| YP_002114879.1 | LPVTV-GE-----RII | GVLDIDS | STAFGR | STEEDEHG | LRTLVAQLETVLA |
| YP_002146178.1 | LPVTV-GE-----RII | GVLDIDS | STAFGR | STEEDEHG | LRTLVAQLETVLA |
| ZP_03165709.1  | LPVTV-GE-----RII | GVLDIDS | STAFGR | STEEDEHG | LRTLVAQLETVLA |
| YP_002215294.1 | LPVTV-GE-----RII | GVLDIDS | STAFGR | STEEDEHG | LRTLVAQLETVLA |
| ZP_03221812.1  | LPVTV-GE-----RII | GVLDIDS | STAFGR | STEEDEHG | LRTLVAQLETVLA |
| ZP_03342093.1  | LPVTV-GE-----RII | GVLDIDS | STAFGR | STEEDEHG | LRTLVAQLETVLA |
| ZP_03347154.1  | LPVTV-GE-----RII | GVLDIDS | STAFGR | STEEDEHG | LRTLVAQLETVLA |
| ZP_03352578.1  | LPVTV-GE-----RII | GVLDIDS | STAFGR | STEEDEHG | LRTLVAQLETVLA |
| ZP_03357060.1  | LPVTV-GE-----RII | GVLDIDS | STAFGR | STEEDEHG | LRTLVAQLETVLA |
| ZP_03371453.1  | LPVTV-GE-----RII | GVLDIDS | STAFGR | STEEDEHG | LRTLVAQLETVLA |
| ZP_03379701.1  | LPVTV-GE-----RII | GVLDIDS | STAFGR | STEEDEHG | LRTLVAQLETVLA |
| ZP_03383790.1  | LPVTV-GE-----RII | GVLDIDS | STAFGR | STEEDEHG | LRTLVAQLETVLA |
| ZP_03412299.1  | LPVTV-GE-----RII | GVLDIDS | STAFGR | STEEDEHG | LRTLVAQLETVLA |
| ZP_03217260.1  | LPVTV-GE-----RII | GVLDIDS | STAFGR | STEEDEHG | LRTLVAQLETVLG |
| YP_002237781.1 | FPLRV-ND-----QII | GVLDIDS | STAYGR | STAEDDQ  | LRTLVEQLEKLI  |
| YP_001336004.1 | FPLRV-NG-----QII | GVLDIDS | PAYGR  | STAEDDQ  | LRTLVEHLEKLI  |
| YP_001437512.1 | LPLRA-DG-----EII | GVLDIDS | TVFNRS | DADDEQ   | LCTLVEQLEAVIA |
| ZP_03403067.1  | LPVTV-GE-----RII | GVLDIDS | STAFGR | STEEDEHG | LRTLVAQLETVLA |
| YP_001907453.1 | LPITV-NG-----HVI | GVLDIDS | VEYNRS | DEDEK    | LKALTDGLCAVLS |
| YP_001006127.1 | LPITV-QG-----KVI | GVLDIDS | SIVYDR | DEDELG   | LISVVAGLCEHLE |
| NP_669181.1    | LPITV-KG-----KVI | GILDIDS | SIVYDR | DEDELG   | LISVVAGLCEHLE |
| NP_993079.1    | LPITV-KG-----KVI | GILDIDS | SIVYDR | DEDELG   | LISVVAGLCEHLE |
| YP_070893.1    | LPITV-KG-----KVI | GILDIDS | SIVYDR | DEDELG   | LISVVAGLCEHLE |
| YP_651729.1    | LPITV-KG-----KVI | GILDIDS | SIVYDR | DEDELG   | LISVVAGLCEHLE |
| YP_647856.1    | LPITV-KG-----KVI | GILDIDS | SIVYDR | DEDELG   | LISVVAGLCEHLE |
| YP_001163103.1 | LPITV-KG-----KVI | GILDIDS | SIVYDR | DEDELG   | LISVVAGLCEHLE |
| ZP_01888376.1  | LPITV-KG-----KVI | GILDIDS | SIVYDR | DEDELG   | LISVVAGLCEHLE |
| YP_001400647.1 | LPITV-KG-----KVI | GILDIDS | SIVYDR | DEDELG   | LISVVAGLCEHLE |
| YP_001607069.1 | LPITV-KG-----KVI | GILDIDS | SIVYDR | DEDELG   | LISVVAGLCEHLE |
| ZP_02221459.1  | LPITV-KG-----KVI | GILDIDS | SIVYDR | DEDELG   | LISVVAGLCEHLE |
| ZP_02227087.1  | LPITV-KG-----KVI | GILDIDS | SIVYDR | DEDELG   | LISVVAGLCEHLE |
| ZP_02229339.1  | LPITV-KG-----KVI | GILDIDS | SIVYDR | DEDELG   | LISVVAGLCEHLE |
| ZP_02237158.1  | LPITV-KG-----KVI | GILDIDS | SIVYDR | DEDELG   | LISVVAGLCEHLE |
| ZP_02307206.1  | LPITV-KG-----KVI | GILDIDS | SIVYDR | DEDELG   | LISVVAGLCEHLE |

Supplemental data

|                |               |      |   |   |   |   |   |   |   |   |   |   |   |   |   |   |   |   |   |   |   |   |   |   |   |   |   |   |   |   |   |   |   |   |   |
|----------------|---------------|------|---|---|---|---|---|---|---|---|---|---|---|---|---|---|---|---|---|---|---|---|---|---|---|---|---|---|---|---|---|---|---|---|---|
| ZP_02314388.1  | LPITV-KG----- | KVI  | G | I | L | D | I | S | I | V | D | R | F | D | E | D | D | E | L | G | - | L | I | S | V | V | A | G | L | C | E | H | L | E |   |
| ZP_02318544.1  | LPITV-KG----- | KVI  | G | I | L | D | I | S | I | V | D | R | F | D | E | D | D | E | L | G | - | L | I | S | V | V | A | G | L | C | E | H | L | E |   |
| YP_001720525.1 | LPITV-KG----- | KVI  | G | I | L | D | I | S | I | V | D | R | F | D | E | D | D | E | L | G | - | L | I | S | V | V | A | G | L | C | E | H | L | E |   |
| YP_001872871.1 | LPITV-KG----- | KVI  | G | I | L | D | I | S | I | V | D | R | F | D | E | D | D | E | L | G | - | L | I | S | V | V | A | G | L | C | E | H | L | E |   |
| YP_002346706.1 | LPITV-KG----- | KVI  | G | I | L | D | I | S | I | V | D | R | F | D | E | D | D | E | L | G | - | L | I | S | V | V | A | G | L | C | E | H | L | E |   |
| YP_001478346.1 | LPLNV-GG----- | QII  | G | V | L | D | I | S | T | V | Y | Q | R | F | D | E | Q | D | E | R | G | - | L | E | A | V | V | A | G | L | C | A | Q | L | E |
| YP_454994.1    | LPITL-DG----- | RVA  | G | V | L | D | I | S | T | I | Y | Q | R | F | D | Q | D | E | E | G | - | L | K | A | V | A | D | Y | L | C | R | Q | L | G |   |
| YP_001217052.1 | IPFSI-NG----- | KVA  | G | V | L | D | I | S | P | N | I | G | R | F | S | E | I | D | E | Q | G | - | L | T | Y | L | M | S | E | V | E | K | L | L | N |
| YP_002150764.1 | LPLEV-NG----- | QII  | G | V | L | D | I | S | P | I | F | G | R | F | D | K | K | D | E | N | G | - | L | K | A | L | C | D | V | L | C | E | H | L | K |
| YP_856816.1    | IPLRR-GG----- | EII  | G | V | L | D | I | S | P | I | F | N | R | F | D | A | Q | D | R | I | G | - | L | E | E | T | V | Q | I | L | E | S | M | L | - |
| YP_001093925.1 | IPLRR-DG----- | QVI  | G | V | L | D | I | S | P | S | F | S | R | F | D | E | A | D | Q | L | G | - | L | E | S | C | V | K | S | L | E | K | A | L | F |
| YP_269525.1    | VPVKI-AG----- | KVIA | I | L | D | I | S | T | V | F | D | R | F | N | L | E | D | E | Q | G | - | I | V | S | I | V | Q | A | F | E | Q | N | I | T | - |
| NP_718189.1    | IPVRA-DG----- | KVIA | V | L | D | I | S | P | I | F | D | R | F | D | E | E | D | Q | K | G | - | L | E | L | L | V | K | S | F | E | K | C | L | F | - |
| YP_001366642.1 | VPVCA-QG----- | NVVA | V | L | D | I | S | P | I | F | D | R | F | D | E | E | D | Q | K | G | - | L | E | L | L | V | K | S | F | E | N | C | L | F | - |
| YP_001554990.1 | VPVCA-QG----- | NVVA | V | L | D | I | S | P | I | F | D | R | F | D | E | E | D | Q | K | G | - | L | E | L | L | V | K | S | F | E | N | C | L | F | - |
| YP_737796.1    | IPVRA-DG----- | KVVA | V | L | D | I | S | P | I | F | D | R | F | D | E | E | D | Q | K | G | - | L | E | L | L | V | K | S | F | E | N | C | L | F | - |
| YP_869415.1    | IPVRA-DG----- | KVVA | V | L | D | I | S | P | I | F | D | R | F | D | E | E | D | Q | K | G | - | L | E | L | L | V | K | S | F | E | N | C | L | F | - |
| NP_797987.1    | IPFSI-KG----- | KVA  | G | V | L | D | I | S | P | S | I | G | R | F | N | E | T | D | E | E | G | - | L | T | H | F | M | S | E | V | E | K | L | L | N |
| YP_001501790.1 | VPLRQ-NG----- | TVI  | G | V | L | D | I | S | P | S | L | S | R | F | S | E | I | D | Q | Q | G | - | V | E | T | L | V | K | S | L | E | I | C | L | I |
| YP_927460.1    | VPVRH-QG----- | RVIA | V | L | D | I | S | P | S | F | S | R | F | D | E | T | D | Q | A | G | - | L | E | T | L | V | R | T | L | E | K | A | L | F | - |
| YP_001474222.1 | IPIMR-DH----- | EVVA | V | L | D | I | S | P | S | L | A | R | F | A | E | T | D | Q | V | G | - | L | E | K | L | V | N | S | F | E | K | A | L | F | - |
| YP_963195.1    | VPVRA-NG----- | KVIA | V | L | D | I | S | P | S | F | D | R | F | D | E | D | D | Q | K | G | - | L | E | L | L | V | K | S | F | E | N | C | L | F | - |
| YP_001183724.1 | VPVRA-NG----- | KVIA | V | L | D | I | S | P | S | F | D | R | F | D | E | D | D | Q | K | G | - | L | E | L | L | V | K | S | F | E | N | C | L | F | - |
| YP_733804.1    | IPVRA-DG----- | KVVA | V | L | D | I | S | P | I | F | D | R | F | D | E | E | D | Q | K | G | - | L | E | L | L | V | K | S | F | E | N | C | L | F | - |
| YP_001050811.1 | VPVCA-QG----- | NVVA | V | L | D | I | S | P | I | F | D | R | F | D | E | D | D | Q | K | G | - | L | E | L | L | V | K | S | F | E | N | C | L | F | - |
| YP_750914.1    | IPVRQ-GN----- | EVVA | V | L | D | I | S | P | L | L | N | R | F | D | Q | D | D | Q | I | G | - | L | E | N | M | V | K | S | F | E | T | C | L | F | - |
| YP_002126297.1 | VPLVL-ND----- | SLV  | G | V | L | D | I | S | P | V | F | E | R | F | T | E | E | D | E | K | G | - | L | V | E | I | A | Q | I | L | M | D | S | Q | K |
| YP_130129.1    | IPLTV-KG----- | ELI  | G | V | L | D | I | S | P | S | L | S | R | F | D | Q | N | D | E | D | G | - | L | V | S | F | V | K | E | L | Q | K | S | L | - |
| YP_001445537.1 | IPFTI-NG----- | EVA  | G | V | L | D | I | S | P | N | I | G | R | F | N | E | I | D | E | E | G | - | L | T | Y | F | M | A | E | V | E | K | L | L | N |
| YP_661562.1    | LPVYQ-KG----- | QLL  | G | V | M | D | I | S | P | H | T | G | R | F | D | Q | D | D | M | T | G | - | L | Q | N | L | V | N | I | L | Q | D | A | I | A |
| YP_001674584.1 | VPLRK-NG----- | SVI  | G | V | L | D | I | S | P | S | L | S | R | F | S | E | I | D | Q | Q | G | - | V | E | T | L | V | K | S | L | E | F | C | L | F |
| YP_002417027.1 | IPFSI-DG----- | KIA  | G | V | L | D | I | S | P | N | V | G | R | F | S | Q | I | D | E | D | G | - | L | T | F | F | M | A | E | V | E | K | L | L | N |
| NP_934438.1    | IPFSI-NG----- | QLA  | G | V | L | D | I | S | P | S | I | G | R | F | S | E | I | D | E | Q | G | - | L | T | F | F | M | A | E | V | E | K | L | L | N |
| NP_761466.1    | IPFSI-NG----- | QLA  | G | V | L | D | I | S | P | S | V | G | R | F | S | E | I | D | E | Q | G | - | L | T | F | F | M | A | E | V | E | K | L | L | N |
| YP_001760510.1 | IPVFD-NN----- | RLI  | G | V | L | D | I | S | P | I | L | N | R | F | T | K | T | D | Q | I | G | - | L | E | N | L | V | K | S | F | E | S | A | L | F |
| YP_002312133.1 | VPFRR-NG----- | DVI  | G | V | L | D | I | S | P | S | L | S | R | F | D | E | I | D | Q | Q | G | - | V | E | T | L | V | K | S | L | E | N | C | L | F |
| YP_562727.1    | IPVRR-GN----- | EVIA | V | L | D | I | S | P | S | F | D | R | F | D | S | E | D | Q | L | G | - | L | E | K | L | V | K | S | L | E | S | C | L | F | - |
| NP_693123.1    | VPITI-NN----- | QIY  | G | V | L | D | I | S | P | I | N | N | R | F | D | E | E | D | Q | Y | F | - | L | E | K | F | V | L | H | L | T | K | H | L | Q |
| YP_001699747.1 | IPLMK-QG----- | EVM  | G | V | L | D | I | S | P | T | V | N | R | F | S | K | E | D | Q | A | G | - | L | E | H | F | V | Q | T | L | L | L | H | I | - |
| YP_001343242.1 | IPVVV-NG----- | QLIA | V | F | D | M | S | P | K | V | G | R | F | S | D | V | D | Q | A | G | - | L | E | S | F | V | A | T | F | I | E | A | T | D | - |
| YP_001141806.1 | IPVRR-GG----- | EII  | G | V | L | D | I | S | P | I | F | N | R | F | D | E | K | D | R | I | G | - | L | E | E | T | V | Q | I | L | E | S | M | L | - |
| YP_204661.1    | IPFYR-NG----- | ELA  | G | V | L | D | I | S | P | K | F | N | R | F | S | E | I | D | E | K | G | - | L | V | D | F | M | K | E | A | E | K | R | L | - |

Supplemental data

|                |               |      |         |          |      |          |                |               |
|----------------|---------------|------|---------|----------|------|----------|----------------|---------------|
| YP_301135.1    | VPLRK-NN----- | QII  | GVLDID  | DAPITSR  | F    | TDV      | DKNG-          | LEQIVARIEKQIS |
| YP_002156075.1 | IPFYR-NG----- | KLA  | GVLDID  | SPKFNRF  | SEI  | DEKG-    | LVDFMKEAEKRL-  |               |
| NP_244074.1    | IPLFQ-NG----- | VLY  | GVLDID  | SPSLNRF  | S    | EEEQAL-  | LESFVDVLSKLNK  |               |
| YP_001559126.1 | IPMKK-NG----- | TIL  | GVLDID  | SPKFHRF  | DEVD | DAEY-    | LEQIITLLVECCD  |               |
| YP_080250.1    | VPLEV-DG----- | SII  | GVLDID  | SPIKNRF  | DET  | DEYY-    | LKKFTEKLGERSL  |               |
| YP_253122.1    | IPIHV-ND----- | EII  | GVLDID  | DAPITDR  | F    | TNEDKEG- | LEVIVKVIEKQLT  |               |
| YP_261333.1    | VPLVK-DG----- | RLI  | GVLDLD  | SPKLARF  | GVAD | QAG-     | IEQLAAIFLRLSD  |               |
| YP_001187407.1 | VPLVK-EG----- | RLI  | GVLDLD  | SPSVGRF  | TEVD | QAG-     | IEALAAIFLAASD  |               |
| YP_001422246.1 | LPIRV-NG----- | EVI  | GVLDID  | SPVKNRF  | DET  | DETY-    | LAKFVETLEKRLG  |               |
| YP_001748360.1 | IPLVK-EG----- | RLI  | GVLDLD  | SPKLARF  | SEAD | QRG-     | LERLAAVFLELTD  |               |
| YP_155660.1    | APIVV-NG----- | KTV  | AVLDVDS | SPSVGRF  | SEED | AKA-     | IQAIADYCQTLNW  |               |
| NP_744032.1    | IPLVK-DG----- | RLI  | GVLDLD  | SPTVGRF  | SEAD | QVG-     | LERLAAIFLALTD  |               |
| YP_001269146.1 | IPLVK-DG----- | RLI  | GVLDLD  | SPTVGRF  | SEAD | QVG-     | LERLAAIFLALTD  |               |
| YP_236680.1    | VPLIK-EG----- | RLI  | GVLDLD  | SPSVGRF  | NEED | QAG-     | IERLVAIFLASTD  |               |
| YP_001667695.1 | IPLVK-EG----- | RLI  | GVLDLD  | SPKGRF   | GEAD | QVG-     | LERLAAIFLELTD  |               |
| YP_188854.1    | IPLHQ-NG----- | KII  | GVLDID  | DAPIKNRF | SQDD | QEG-     | LESIVKTLEKQLN  |               |
| YP_002275225.1 | VPILD-GD----- | RLI  | GVLDID  | SPIRDRF  | TPQD | RLV-     | LEQVAALLVPAPT  |               |
| YP_804779.1    | LPLMV-GN----- | QLL  | GVLDID  | SPILNRF  | SEDE | BEAT-    | LIKFRDALVKHID  |               |
| NP_470973.1    | LPIVK-NN----- | QLF  | GVLDID  | SPLFNRF  | DEVD | QLW-     | LEKIRDAITQEIN  |               |
| YP_607257.1    | IPLVK-AG----- | RLI  | GVLDLD  | SPKLARF  | SEAD | QAG-     | LERLAAIFLELTD  |               |
| YP_001860169.1 | IPLQKANG----- | ELV  | GVLDID  | SPVLERF  | DD   | EDRRG-   | LEELAKIFVASLR  |               |
| NP_465120.1    | LPIVK-NN----- | QLL  | GVLDID  | SPLFNRF  | NEVD | QLW-     | LEKIRDAIVQEIN  |               |
| NP_372242.1    | VPIFK-DD----- | KII  | GVLDID  | DAPITDR  | F    | DDNDKEH- | LEAIVKIIIEKQLA |               |
| NP_374828.1    | VPIFK-DD----- | KII  | GVLDID  | DAPITDR  | F    | DDNDKEH- | LEAIVKIIIEKQLA |               |
| YP_001247140.1 | VPIFK-DD----- | KII  | GVLDID  | DAPITDR  | F    | DDNDKEH- | LEAIVKIIIEKQLA |               |
| YP_001316940.1 | VPIFK-DD----- | KII  | GVLDID  | DAPITDR  | F    | DDNDKEH- | LEAIVKIIIEKQLA |               |
| YP_001442294.1 | VPIFK-DD----- | KII  | GVLDID  | DAPITDR  | F    | DDNDKEH- | LEAIVKIIIEKQLA |               |
| YP_002314836.1 | VPMMK-NG----- | VVI  | GVLDID  | SPIKNRF  | DEI  | DEQY-    | LQRFVETLVQHLN  |               |
| YP_001814701.1 | VPLIK-DG----- | KTI  | GVLDID  | SPELSRF  | DET  | QAG-     | LEAFSEILLRHI-  |               |
| NP_646478.1    | VPIFK-DD----- | KII  | GVLDID  | DAPITDR  | F    | DDNDKEH- | LEAIVKIIIEKQLA |               |
| YP_043764.1    | VPIFK-DD----- | KII  | GVLDID  | DAPITDR  | F    | DDNDKEH- | LEAIVKIIIEKQLA |               |
| YP_186602.1    | VPIFK-DD----- | KII  | GVLDID  | DAPITDR  | F    | DDNDKEH- | LEAIVKIIIEKQLA |               |
| YP_494359.1    | VPIFK-DD----- | KII  | GVLDID  | DAPITDR  | F    | DDNDKEH- | LEAIVKIIIEKQLA |               |
| YP_500333.1    | VPIFK-DD----- | KII  | GVLDID  | DAPITDR  | F    | DDNDKEH- | LEAIVKIIIEKQLA |               |
| YP_001332646.1 | VPIFK-DD----- | KII  | GVLDID  | DAPITDR  | F    | DDNDKEH- | LEAIVKIIIEKQLA |               |
| YP_001575592.1 | VPIFK-DD----- | KII  | GVLDID  | DAPITDR  | F    | DDNDKEH- | LEAIVKIIIEKQLA |               |
| ZP_02759966.1  | VPIFK-DD----- | KII  | GVLDID  | DAPITDR  | F    | DDNDKEH- | LEAIVKIIIEKQLA |               |
| YP_001487827.1 | VPLKV-NG----- | EII  | GVLDID  | SPVKDRF  | SEV  | DETY-    | LIQLTEVLQKALS  |               |
| YP_417047.1    | VPIFK-DD----- | KII  | GVLDID  | DAPITDR  | F    | DDNDKEH- | LEAIVKIIIEKQLA |               |
| YP_041183.1    | VPIFK-DD----- | KII  | GVLDID  | DAPITDR  | F    | DDNDKEH- | LEAIVKIIIEKQLA |               |
| YP_176251.1    | IPIRH-EQ----- | NVIA | AVLDID  | SPSKGRF  | HEKE | AEA-     | LERLLKRVEPFLI  |               |
| YP_002349929.1 | LPIVK-NN----- | QLL  | GVLDID  | SPLFNRF  | DEVD | QLW-     | LEKIRDAIVQEIN  |               |

Supplemental data

|                |               |       |      |        |        |           |       |             |            |
|----------------|---------------|-------|------|--------|--------|-----------|-------|-------------|------------|
| YP_001376537.1 | VPMIK-EG----- | NVI   | GVLD | IDS    | SPEKNR | FDKVD     | QQY-  | LEK         | FVETLLKHM- |
| YP_784647.1    | VPLLR-DG----- | QLL   | GVWD | VDS    | SPTPGR | DDAD      | REG-  | MEAL        | CQVFLHSLA  |
| YP_557760.1    | VPLVAPDG----- | TLI   | GVWD | VDS    | SPVVAR | DEED      | DAKG- | MEAL        | CAVFIQAAL  |
| YP_275769.1    | VPLIK-DG----- | RLI   | GVLD | LDS    | SPSVGR | NEVD      | QAG-  | IER         | LAAIFLASTD |
| YP_001118914.1 | VPLVAADG----- | TLI   | GVWD | VDS    | SPVAAR | DDED      | DRSG- | MEAL        | CRVFVEHAW  |
| YP_001782545.1 | VPIIK-EN----- | KIL   | GVLD | LDS    | SIEFGR | TELEEKY-  | FEK   | FVQILVENID  |            |
| NP_882192.1    | VPLVH-KG----- | SLL   | GVWD | VDS    | SPLPGR | DDED      | DRAG- | MEAL        | CEVFLHSLG  |
| YP_001894915.1 | VPLVAPDG----- | TLI   | GVWD | VDS    | SPSVAR | DEED      | DAKG- | MEAL        | CAVFLIEAAL |
| YP_001647268.1 | VPIMK-EG----- | NII   | GVLD | IDS    | SPEKNR | DEVD      | QHY-  | LEK         | FVETLLKHI- |
| NP_882465.1    | VPLLH-KG----- | SLL   | GVWD | VDS    | SPLPGR | DDED      | DRAG- | MEAL        | CEVFLHSLG  |
| YP_002448219.1 | VPIVK-EG----- | AVI   | GVLD | IDS    | SPEKNR | DEVD      | QHY-  | LEK         | FVETLLKHM- |
| NP_834359.1    | VPIVK-EG----- | AVI   | GVLD | IDS    | SPEKNR | DEVD      | QRY-  | LEK         | FVETLLKHM- |
| YP_002369448.1 | VPIVK-EG----- | AVI   | GVLD | IDS    | SPEKNR | DEVD      | QRY-  | LEK         | FVETLLKHM- |
| YP_191278.1    | LPVVA-RG----- | ALV   | GVLD | IDS    | SPVKDR | SDADR     | TR-   | LKE         | VVSLLVATLE |
| NP_886654.1    | VPLVH-QG----- | SLL   | GVWD | VDS    | SPLPGR | DDED      | DRAG- | MEAL        | CEVFLHSLG  |
| NP_847103.1    | VPIIK-DG----- | NVI   | GVLD | IDS    | SPEKNR | DEVD      | QRY-  | LEK         | FVETLLKHM- |
| YP_030799.1    | VPIIK-DG----- | NVI   | GVLD | IDS    | SPEKNR | DEVD      | QRY-  | LEK         | FVETLLKHM- |
| NP_981083.1    | VPIIK-DG----- | NVI   | GVLD | IDS    | SPEKNR | DEVD      | QRY-  | LEK         | FVETLLKHM- |
| YP_038702.1    | VPIIK-DG----- | NVI   | GVLD | IDS    | SPEKNR | DEVD      | QRY-  | LEK         | FVETLLKHM- |
| YP_002340711.1 | VPIIK-DG----- | NVI   | GVLD | IDS    | SPEKRR | DEVD      | QRY-  | LEK         | FVETLLKHM- |
| YP_085975.1    | VPIIK-DG----- | NVI   | GVLD | IDS    | SPEKNR | DEVD      | QRY-  | LEK         | FVETLLKHM- |
| YP_002453717.1 | VPIIK-DG----- | NVI   | GVLD | IDS    | SPEKRR | DEVD      | QRY-  | LEK         | FVETLLKHM- |
| YP_772921.1    | VPLVAADG----- | TLI   | GVWD | VDS    | SPVAAR | DDED      | DRNG- | MEAL        | CRVFVEHAW  |
| YP_001843726.1 | VPIHQ-GD----- | KLW   | GVLD | IDS    | SPKLAR | DQED      | QAG-  | LER         | LAPLFLPGA- |
| YP_942902.1    | LPISL-QG----- | APALL | LIDS | SPIKNR | DTQND  | QDG-      | LAY   | LVEIQIQQHL- |            |
| YP_121651.1    | VPLVR-DD----- | TVI   | GVLD | LDS    | SPRPGR | DTVDR     | DRG-  | LEA         | VARVFLDAL- |
| YP_001633478.1 | VPLVH-NG----- | ELI   | GVWD | VDS    | SEPGR  | DEDD      | DRQG- | MQAL        | CAVFLASLA  |
| YP_001392189.1 | VPIIK-ED----- | KIL   | GLDL | LDS    | SIEFGR | TELEEKY-  | FKK   | FVQILVENID  |            |
| YP_795394.1    | VPLTI-GE----- | TKF   | GVLD | IDS    | SPTKDR | TAAD      | QQV-  | LEE         | FARVLLSHID |
| YP_002284153.1 | IPLVK-DG----- | GIV   | GVLD | LDS    | SPTPHR | DAED      | QAG-  | FEAL        | AAIYVAASA  |
| YP_001255404.1 | VPIIK-ED----- | KVL   | GVLD | LDS    | SIEFGR | FTGLEEKY- | FKK   | FVQILVENID  |            |
| YP_001385170.1 | VPIIK-ED----- | KVL   | GVLD | LDS    | SIEFGR | FTGLEEKY- | FKK   | FVQILVENID  |            |
| YP_001388639.1 | VPIIK-ED----- | KVL   | GVLD | LDS    | SIEFGR | FTGLEEKY- | FKK   | FVQILVENID  |            |
| YP_001347703.1 | VPLLK-DG----- | RLI   | GVLD | LDS    | SPSEGR | FSARD     | QAG-  | IER         | LVEIFLRLSD |
| NP_103622.1    | VLLD-DE-----  | GVF   | GVLD | LDS    | SPLPGR | FDKAD     | QAG-  | IET         | LAAIYAAASS |
| YP_001807739.1 | VPLVAADG----- | TLI   | GVWD | VDS    | SPVAAR | DDED      | DRNG- | MEAL        | CRVFVEHAW  |
| YP_001580337.1 | VPLVADDG----- | TLI   | GVWD | VDS    | SPVAAR | DDED      | DRRG- | MEAL        | CRVFVEHAW  |
| YP_002230176.1 | VPLVAGDG----- | TLI   | GVWD | VDS    | SPVAAR | DDED      | DRQG- | MEAL        | CRVFVEHAW  |
| NP_251512.1    | VPLIK-DG----- | RLVA  | VLDL | LDS    | SPSVGR | FSaed     | QAG-  | IEGL        | VEIFLRLTD  |
| YP_459505.1    | VPVVR-DD----- | TVVA  | VIDL | LDS    | APTAKR | FSARAD    | AEAG- | IEEL        | ARRIAGRI-  |
| YP_790351.1    | VPLLK-DG----- | RLVA  | VLDL | LDS    | SPSVGR | FSaed     | QAG-  | IEGL        | VEIFLRLTD  |
| YP_002439846.1 | VPLLK-DG----- | RLVA  | VLDL | LDS    | SPSVGR | FSaed     | QAG-  | IEGL        | VEIFLRLTD  |

Supplemental data

YP\_001970489.1 VPLLR-GD-----ELI G V F D I D S P K V G R F D A D D Q A G - L E A I A R V F V E A L G  
 YP\_617023.1 VPVIA-ND-----RLV G V L D L D S P L P A R F T A A D Q A G - A E A L V A R I A G A L A  
 YP\_620554.1 VPLVADDG-----TLI G V W D V D S P V A A R F D D E D R K G - M E A L C R V F V E H A W  
 YP\_834795.1 VPLVADDG-----TLI G V W D V D S P V A A R F D D E D R K G - M E A L C R V F V E H A W  
 YP\_148653.1 VPLIK-DD-----RVI G V L D I D S P V K N R F D D I D R R Y - L E Q F A S V L I S A --  
 YP\_442277.1 VPLIARDG-----ALI G V W D V D S P L I G R F D A E D A T G - M E A L C R V F V E V A W  
 YP\_334263.1 VPLVARDG-----ALI G V W D V D S P L V G R F D A E D A T G - M E A L C R V F V E V A W  
 YP\_001067073.1 VPLVARDG-----ALI G V W D V D S P L V G R F D A E D A T G - M E A L C R V F V E V A W  
 YP\_368503.1 VPLVAADG-----TLI G V W D V D S P V A A R F D D E D R K G - M E A L C R V F V E S A W  
 YP\_109010.1 VPLVARDG-----ALI G V W D V D S P L V G R F D A E D A I G - M E A L C R V F V E V A W  
 YP\_993758.1 VPLVARDG-----ALI G V W D V D S P L V G R F D A E D A I G - M E A L C R V F V E V A W  
 YP\_001028775.1 VPLVARDG-----ALI G V W D V D S P L V G R F D A E D A I G - M E A L C R V F V E V A W  
 YP\_002026852.1 VPLLR-GD-----ELI G V F D I D S P K V G R F D A D D Q A G - L E A I A R V F V E A L G  
 YP\_001764423.1 VPLVADDG-----TLI G V W D V D S P V A A R F D D E D R T G - M E A L C R V F V E H A W  
 NP\_970249.1 VPLIHNG-----KLL G V L D V D A P V L N R F D S E D Q K G - L Q G L V Q I L I S K T V  
 YP\_001059788.1 VPLVACDG-----ALI G V W D V D S P L V G R F D A E D A T G - M E A L C R V F V E V A W  
 YP\_001081316.1 VPLVARDG-----ALI G V W D V D S P L V G R F D A E D A I G - M E A L C R V F V E V A W  
 YP\_001875000.1 VPIIK-NG-----TLF G V L D I D S P I K N R F S D E D R I F - F E K V V G L F S K Y S D  
 YP\_278248.1 IPIIV-NS-----KLY G V L D L D S P L K S N F K D K E I V L T L E K I A T E L A N K I K  
 YP\_001309672.1 IPIIK-EG-----NLI G V L D L D S E E F E R F T E V E K T Y - L E K A V V I L S K Y I E  
 YP\_001576818.1 VPIFK-DD-----QLW G V F D F D S T K L D N F D E T D K K Y - L T E I A N V I F A ---  
 YP\_193206.1 IPIFK-NR-----KLW G V F D F D S T K L D D F D D M D K K Y - L T R I T K M V F A ---  
 YP\_199405.1 IPLVK-GD-----TLI G V L D L D S P E L D R F D A D D Q R G - L E A I A Q L F V D A L A  
 YP\_001915608.1 IPLVK-GD-----TLI G V L D L D S P E L D R F D A D D Q R G - L E A I A Q L F V D A L A  
 YP\_002509654.1 IPVEV-DG-----DII G V L D I D S P V K N R F D E I D K R Y - L E E F V K K I I N L S D  
 YP\_757341.1 VPVRDA-----AGALVA V L D I D S T E F G A F D E V D Q A G - L E A I C G E L -----  
 YP\_810624.1 VPIFS-KN-----EFW G V L D L D S T K F N Y F D K N D Q E Y - L E K I G N Y I F G I --  
 YP\_244708.1 IPLVR-GD-----TLI G V L D L D S P E L D R F D A D D Q R G - L E A I A Q V F V G A L T  
 NP\_635978.1 IPLVQ-GD-----TLI G V L D L D S P E L D R F D A D D Q R G - L E A I A Q V F V G A L T  
 XP\_505859.1 VPIV-LNG-----KLF G V I D I D C A S L E G F D E V D Q Q G - L E K I A L I L A K S C E  
 NP\_964546.1 VPIFKANG-----DLW G V F D F D S T K L A N F D E L D Q K Y - L E K I S K V F K F ---  
 YP\_001261873.1 VPIVH-EG-----RLI G V L D L D S P I K G R F D E Q D V V G - C A E L M A V L G P R I A  
 YP\_814311.1 IPIFKKNG-----ELW G V F D F D S T K I A N F D E L D Q K Y - L E A I S N I F K F ---  
 NP\_298520.1 VPLLK-DD-----TLI G V L D L D S P T C A R F D S D D Q T G - I E S L A R V F V S S L R  
 YP\_001775202.1 VPLLK-DD-----TLI G V L D L D S P T C A R F D S D D Q T G - I E S L A R V F V S S L R  
 YP\_001829224.1 VPLLK-DN-----TLI G V L D L D S P T C A R F D S D D Q T G - I E S L A R V F V S N L R  
 NP\_778732.1 VPLLK-DN-----TLI G V L D L D S P T C A R F D S D D Q T G - I E S L A R V F V S N L R  
 NP\_246070.1 VPIFQ-GG-----EMIAEL D V D S P R L A R F S A E D V A F - L E N C A A L I C I K E -  
 XP\_645637.1 LPLYK-----QGNII G V L D V D S D K L N S F D E I D E K Y - L T Q I L K L L D N ---  
 XP\_456263.1 VPIV-QNG-----ETV G V I D I D C L D Y N G F T K L D Q E F - L E K L A A S V S K T C V  
 YP\_001300883.1 VPILA-----NGQVK G V L D I D S N L L N F F D E T D R R Y - L E E V T A I V A K T --  
 YP\_812434.1 VPVFNRDG-----SLW G V Y D F D S I N L D N F D D L D Q K Y - L E Q I A A V A L G N --

Supplemental data

NP\_814796.1 VPMVKNHQ-----LVGVLDIDSGVTNSYDAVDQLY-LEKfvTLLLEKSD  
 NP\_358362.1 VPMMKNGQ-----LLGVLDLDSSEIEDYDAMDRDY-LEQFVAILLEKTT  
 YP\_816246.1 VPMMKNGQ-----LLGVLDLDSSEIEDYDAMDRDY-LEQFVAILLEKTT  
 YP\_001694316.1 VPMMKNGQ-----LLGVLDLDSSEIEDYDAMDRDY-LEQFVAILLEKTT  
 YP\_001835526.1 VPMMKNGQ-----LLGVLDLDSSEIEDYDAMDRDY-LEQFVAILLEKTT  
 YP\_002037500.1 VPMMKNGQ-----LLGVLDLDSSEIEDYDAMDRDY-LEQFVAILLEKTT  
 NP\_345351.1 VPMMKNGQ-----LLGVLDLDSSEIEDYDAMDRDY-LEQFVAILLEKTA  
 XP\_001385863.2 VPLV-KEG-----KILAVLDIDCLALDGFDESDDKKF-LEELAVLIVRTCE  
 NP\_985662.1 VPIL-QDN-----RTVAIMLDCSEHNGFTDLDKKY-LEKLAQEISRTCK  
 YP\_759928.1 LPVFRA-----DGSLAAVLDVDSSTQFDASDAVDQAG-LTAICESL-----  
 YP\_002123053.1 VPMLKAGR-----LVGVLDLDS SLVADYDQIDQDY-LEQFVALLLENTS  
 YP\_002131343.1 VPVLDA-----GGELIAVFDVDSSETKAAF DSTDREW-LERILSET-----  
 XP\_001683506.1 VPVLIENG-----SVVAVIDVDSSTELGHFSEEDREG-LERMAAVLAQHLD  
 NP\_012854.1 VPIISNDG-----KTLGVLDIDCLDYEGFDHVDKEF-LEKLAKLINKSCV  
 XP\_460154.1 VPIV-NKG-----QVVGVLIDIDCLTLEGFDDIDVKY-LEQLATLIGNTCD  
 XP\_001801028.1 VPIVQGG-----RTVAIIDVDCAELSGF DGEDQRA-LEELACMLGEACD  
 YP\_001201197.1 VPMVKNDQ-----LLGVLDLDS SRLVADYDTIDQDY-LEKfvALLVEKTD  
 XP\_001484046.1 VPIV-YEN-----KVVGVLDIDCLDLNGF DDKVDQKY-LERLVEMISSSCK  
 NP\_274882.1 VPLFS-----DGRCIGVLDADSEHLAQFDETDALY-LGELAKILEKR--  
 YP\_001302571.1 VPVIW-----ADKVIAVLDIDSDQPDSFDETDQIF-LEKIVELLPHQ--  
 YP\_002000650.1 VPLFS-----DGRCIGVLDADSEHLAQFDEADALY-LGELAKILERR--  
 YP\_001682978.1 VPFVDA-----AGTLLAVFDVDS DQPAASDAVDQHG-IEIILKAT-----  
 YP\_002342048.1 VPLFS-----DGRCIGVLDADSEYLAQFDETDALY-LGELAKILEKR--  
 YP\_207199.1 VPLFS-----DGRCIGVLDADSEHLAQFDEADALY-LGELAKILERR--  
 XP\_844799.1 VPIKSAAG-----EVVGIIDVDSSTQLNFFDDVDAQG-LQEVAEIVARHVD  
 YP\_001598496.1 VPLFS-----DGRCIGVLDADSEHLAQFDETDALY-LGELAKILEKR--  
 YP\_974447.1 VPLFS-----DGRCIGVLDADSEHLAQFDETDALY-LGELAKILEKR--  
 XP\_001465858.1 VPVLIENG-----SVVAVIDVDSSTELDHFSEEDKEG-LERMAAVLAQHLD  
 YP\_001280815.1 VPITDE-----AGEIIAVLDIDSDTLATFDEVDGEY-LQQLVDLLK----  
 NP\_664843.1 VPMVKEGH-----LIGVLDLDS SLVADYDEV DQY-LEAFVDLFLFKTT  
 NP\_802083.1 VPMVKEGH-----LIGVLDLDS SLVADYDEV DQY-LEAFVDLFLFKTT  
 YP\_280574.1 VPMVKEGH-----LIGVLDLDS SLVADYDEV DQY-LEAFVDLFLFKTT  
 YP\_001128311.1 VPMVKEGH-----LIGVLDLDS SLVADYDEV DQY-LEAFVDLFLFKTT  
 YP\_002286076.1 VPMVKEGH-----LIGVLDLDS SLVADYDEV DQY-LEAFVDLFLFKTT  
 XP\_390238.1 VPILVAQDDGT-----KKLVAIIDIDCAELNGFDEVDKAH-LEQLAALLATSCD  
 XP\_001565241.1 VPVLIENG-----SVVAVIDVDSSTELGYFSEEDKEG-LERVAAVLEQHNLN  
 YP\_596891.1 VPMVKEGH-----LIGVLDLDS SLVADYDEV DQY-LEAFVDLFLFKTT  
 YP\_600772.1 VPMVKEGH-----LIGVLDLDS SLVADYDEV DQY-LEAFVDLFLFKTT  
 YP\_001351938.1 VPIYFDR-----NGEVA GVLDVDSSEYPDAFSAVDQLW-LEKIAALLS----  
 XP\_001910908.1 VPIMVEGK-----GVVGIIDIDICTVENGFDQIDKEY-LEKLADFLAKSSD  
 XP\_446236.1 VPIVSQSG-----KTLGVLDLDC LDFEGFTDVKY-LEKLALAITKSCD  
 NP\_607473.1 VPMVKEGH-----LIGVLDLDS SLVADYDEV DQY-LETfvDLLLEKTT

Supplemental data

YP\_060405.1 VPMVKEGH-----LI**GVLDLDS**SLVADYDEVD**Q**EY-**L**ETFVDLLEKTT  
 YP\_602707.1 VPMVKEGH-----LI**GVLDLDS**SLVADYDEVD**Q**EY-**L**ETFVDLLEKTT  
 NP\_269471.1 VPMVKEGH-----LI**GVLDLDS**SLVADYDEVD**Q**EY-**L**EAFVDLFLEKTT  
 YP\_282476.1 VPMVKEGH-----LI**GVLDLDS**SLVADYDEVD**Q**EY-**L**EAFVDLFLEKTT  
 YP\_598792.1 VPMVKEGH-----LI**GVLDLDS**SLVADYDEVD**Q**EY-**L**EAFVDLFLEKTT  
 YP\_099090.1 VPLIK-----DGEVW**GVLDLDS**DLLN**F**DETD**R**KY-**L**EEMCGYLSK---  
 NP\_421082.1 VPVFD**P**-----DGRLIA**V**FD**V**SD**K**PA**A**F**D**EID**Q**AW-**L**EKILKAT-----  
 YP\_001034962.1 VPMVKVGR-----LL**GVLDLDS**SLTG**D**YDKV**D**Q**E**Y-**L**EKFVQILLEKTT  
 YP\_211509.1 VPLIK-----DGEVW**GVLDLDS**DLLN**F**DETD**R**KY-**L**EEMCGYLSK---  
 XP\_001940256.1 VPVVQDG-----K**V**VAI**I**D**I**D**C**AEL**N**G**F**TEED**Q**EA-**L**EELAELLSQSCD  
 YP\_001450196.1 VPMVKDGR-----LL**GVLDLDS**SLTG**D**YDKI**D**Q**E**Y-**L**EKFVQILLEKTI  
 XP\_680937.1 VPILAGG-----ET**V**AI**I**D**I**D**C**AEP**S**G**F**DEDE**K**EY-**L**EELAALLSESCD  
 XP\_001265696.1 VPILVGG-----ET**V**AI**I**D**V**D**C**TE**P**AG**F**DEDE**K**KW-**L**EELASLLSECCD  
 XP\_367405.1 VPVLDSEG-----Q**L**RAI**I**D**V**D**C**AL**P**DG**F**DEV**D**R**V**W-**L**ESLAALVGRSCD  
 YP\_001033719.1 VPMVKDGN-----L**V**GVLDLDSSEVGFYDEID**Q**KY-**L**EEFASILCDMTD  
 YP\_812051.1 VPMVKDGN-----L**V**GVLDLDSSEVGFYDEID**Q**KY-**L**EEFASILCDMTD  
 NP\_810723.1 VPIIK-----EG**N**VI**GVLDLDS**DT**P**DS**F**DETD**A**RY-**L**EEICTYIG----  
 YP\_141537.1 VPMEKGGK-----L**V**GVLDLDSHQVEDYNQVD**Q**DY-**L**EAFVKILLEKTD  
 NP\_721920.1 IPMVKDGQ-----L**I**GVLDLDSH**L**VGDYD**V**ID**Q**GY-**L**EQFVTILLEKTN  
 YP\_820528.1 VPMEKGGK-----L**V**GVLDLDSHQVEDYNQVD**Q**DY-**L**EAFVKILLEKTD  
 XP\_001246405.1 VPIVVDG-----ET**L**AL**I**D**I**D**C**T**Q**PSG**F**DEID**K**KG-**L**EHLAKLLAENCD  
 YP\_612063.1 LPVRNR-----A**G**EVI**GVLDLDS**N**Q**PA**A**F**D**R**D**Q**D**A-**L**ETLLHAV-----  
 YP\_444835.1 VPVL-----**T**P-----D**D**ALL**A**V**L**D**V**SD**T**LG**A**F**D**PT**D**REH-**L**EALCRDLG----  
 NP\_943356.1 LPVRI-NN-----**T**V**V**GA**L**D**I**D**S**PA**F**S**R**F**S**SE**D**EL-----  
 YP\_631535.1 VPVFGR-----N**R**ELL**A**V**L**D**I**D**S**E**H**K**N**A**F**DEV**D**R**R**E-**L**EELVRFW-----  
 NP\_687842.1 VPMFKNGK-----L**L**GVLDLDS**S**LVADYDEID**Q**EY-**L**EKFVGILVEHTI  
 YP\_329573.1 VPMFKNGK-----L**L**GVLDLDS**S**LVADYDEID**Q**EY-**L**EKFVGILVEHTI  
 XP\_001692446.1 VPVVRSHISFNDGRTPSI-----P**E**KL**V**A**V**L**D**V**D**S**D**HP**A**A**F**TEV**D**Q**E**C-**L**EELCEWLGDHLQ  
 NP\_390842.2 LPIRV-DG-----**K**IV**GVLDLDS**SP**V**KN**R**F**D**EID**E**KY-**L**TQFAETLEKALA  
 YP\_511991.1 LPVRDA-----S**G**AI**I**A**V**L**D**I**D**S**N**Q**P**DA**F**T**Q**D**D**ATA-**L**ESILRAT-----  
 XP\_719233.1 VPIV-KNG-----E**T**K**GVLDLDS**CL**D**LEG**F**D**Q**V**D**Q**K**Y-**L**EKLAELIAQSL-  
 NP\_735295.1 VPMFKNGK-----L**L**GVLDLDS**S**LVADYDEID**Q**EY-**L**EKFVGILVEHTI  
 YP\_168601.1 LPVFGR-----**T**GAL**I**A**V**FD**I**D**S**DL**P**DA**F**TV**A**DA**E**A-**L**GAILEQV-----  
 YP\_001169098.1 LPVRNG-----E**G**RL**L**GVLDLDS**N**TP**A**A**F**TEED**A**RR-**L**QALLDRT-----  
 XP\_001216799.1 VPILAGG-----E**T**VAI**I**D**I**D**C**TE**P**DG**F**DETD**K**KY-**L**EELAALLADSCD  
 YP\_437091.1 LPLFNA-----N**G**D**V**AA**V**L**D**I**D**S**D**HID**A**F**D**AV**D**ER**F**-**L**AELLTDL-----  
 XP\_001390389.1 VPILSKG-----E**T**VAI**I**D**I**D**C**AEP**D**G**F**DEDE**K**KY-**L**EELAALLAECDD  
 XP\_001550500.1 VPIVVDG-----**V**V**K**AI**I**D**V**D**C**GV**K**EG**F**DEV**D**R**K**W-**L**EELAGVLAEGCD  
 XP\_001273080.1 VPVLVGG-----E**T**VAI**I**D**V**D**C**TE**P**SG**F**DEV**D**R**K**Y-**L**EELAALLAECDD  
 YP\_001042044.1 LPVRNG-----E**G**RL**L**GVLDLDS**N**TP**A**A**F**TEED**A**AR-**L**QALLDRT-----  
 YP\_916587.1 IPVIGG-----G**E**R**L**I**GVLDLDS**D**Q**P**D**A**F**TR**D**D**A**D**R**-**L**QEILDAT-----  
 XP\_961529.1 VPIVVDD-----R**V**VAI**I**D**V**D**C**AEL**N**G**F**DEV**D**K**V**W-**L**EKLADLVGRSCD

## Supplemental data

```

YP_351544.1      LPVRNG-----EGWLLGVLDLDSNTPAAFTTEEDAAR-LQALLDRT-----
XP_001588803.1  VPIIVDG-----IVKAIIDVDCGVKEGFDEVDRKW-LEELAGVLAVGCD
XP_762195.1     VPLVIPRTRLAHVHQNALQQQSPLNQATPVDGDDRSWAGRGDAQDIIGVLDIDCESLDGFDQEDETR-LRTIADLIVQRSA
XP_001537789.1  VPILVNG-----ESVNLW-----QHGSKYICA---
YP_001198994.1  ---IRN-----RCANGEKRPVAG-----RFG
NP_390842.1     LPIRV-DG-----KIVGVLDIDSPVKNRFDEIDEKY-LTQFAETLEKALA
YP_001469780.1  VPIM-----IDGIITYGELDIDSHISNAFDKDELFLKKNICDKISQKIR
NP_623333.1     VPIW-----ANGEIIGELDIDSDDLAAFDKDKIF-LEEVAKIIGRKLE
YP_001567589.1  VPIFD-----KNGNIVGELDIDSHKAPFDQDRSF-LEAIAKLLSERFW
NP_228329.1     VPIF-----KDGKIIGELDIDSYSPSPFSEEDRAF-LEKVCELVSKVV-
YP_001244004.1  VPIF-----KDGKIIGELDIDSYSPSPFSEEDRAF-LEKVCELVSKVV-
YP_001738457.1  VPIF-----KDGKIIGELDIDSYSPSPFSEEDRAF-LEKVCELVSKVV-
YP_591728.1     VPIR-----MKGEIVGELDIDSHDAAFGDEDRTF-CEFCAKLVGGEYLE
YP_001193798.1  VPLF-----VNGVNIQQIDIDSHVIDPSTEADERF-LEFVNQEVAKLF-
YP_001296902.1  VPLF-----VNEKNIQQIDIDSNVLDPFTSADEEF-LEFVNKQVAVLF-
XP_001439866.1  IPVIKN-----GVVQSVLDIDSEHLRFDDEVDSKY-LQRIVEYLI----
XP_001438779.1  IPVIKN-----GVVLSVLDIDSEHLRFDDEVDSKY-LQRIVEYLI----
YP_001319456.1  VPIL-----KGDDVLGELDIDSHEPSAFDSDLQHL-LESICAKLAERL-
XP_001022412.1  IPVFNKTT-----NEVVAVFDIDSTTLNRFPTPFVVEQ-LEKITALVYQ---
YP_001306613.1  VPIF-----NNSEVIGELDIDSHYISPFDLRDQF-LKKICIRVSEIWK
YP_002335308.1  VPIF-----KNKEVIGELDIDSHYITPFDERDRKF-LEKVCEDIPKIWD
NP_394308.1     VPVR-----YQGEPIGELDIDSDKKAAPSKEDAM-LSSIADLMAPLVH
YP_862969.1     IPLF-----VDGENIQQIDIDSHADPFSHEDEVF-LQWVNEKVAEIL-
YP_023758.1     VPIE-----YDNKIIGELDIDSDKKSANEDDERY-ISDICNYIARLVS
NP_111339.1     VPVR-----YGGKPIGELDIDSDTKGAFDKADEEF-LSKVADLIAPLVS
YP_001380982.1  FPIL-----RGERYLAQIDVDSDHPAAFRTGDRAF-LAEAAAILEPVFP
YP_806472.1     VPITV-DN-----RVVAIMDIDSPTLDRFSENDEAI-LTKFGETLAAHLD
YP_001987415.1  VPITV-DN-----RVVAIMDIDSPTLDRFSENDEAI-LTKFGETLAAHLD
NP_785802.1     VPITK-DG-----HQIGVLDVDSPLDRFNADNEAE-LTEFVAILTSHID
YP_818384.1     VPIFK-NG-----QIYGIIIDIDSPLLNRFGENEKNE-VEELAEILANHI-
YP_001621174.1  IPIRH-NG-----AIWAILDLDSVPENRFDKDLVDF-LQQFGLLIENYID

```

**FIGURE SI: Sequence alignment of all putative fRMsr proteins.**

The sequences of 358 putative fRMsr proteins were generated by PEDANT database (<http://pedant.gsf.de/>) and aligned with Bioedit software. The numbering of amino acid residues is based on the *E. coli* fRMsr sequence. For reason of clarity, only the alignment between residues 19 and 170 is represented. The residues conserved at least at 95 % are indicated in black on red boxes (such as Y66, C94, C118, E125, D141 and D143), those conserved at least at 90% in red on blue boxes (such as F78, and C84), and finally, in yellow on green boxes (for example W62) those conserved at 80%.

## Supplemental data

The name of each sequence correspond to NCBI reference:

C84/C94/C118 signature (333 sequences, 93%) :

NP\_288269.1: *Escherichia coli* O157:H7 EDL933; YP\_002403065.1: *Escherichia coli* 55989; YP\_002397981.1 : *Escherichia coli* ED1a ; YP\_002412850.1: *Escherichia coli* UMN026; YP\_001880631.1: *Shigella boydii* CDC 3083-94; YP\_002391608.1: *Escherichia coli* S88; YP\_001730808.1: *Escherichia coli* str. K12 substr. DH10B; ZP\_03003290.1 : *Escherichia coli* 53638; YP\_001743413.1: *Escherichia coli* SMS-3-5; YP\_002407226.1 : *Escherichia coli* IAI39; YP\_002329476.1: *Escherichia coli* O127:H6 str. E2348/69; YP\_002382399.1: *Escherichia fergusonii* ATCC 35469; ZP\_03445135.1: *Escherichia coli* O157:H7 str. TW14588; YP\_688895.1: *Shigella flexneri* 5 str. 8401; YP\_669680.1: *Escherichia coli* 536; NP\_416346.4: *Escherichia coli* str.K-12 substr. MG1655; ZP\_02903917.1: *Escherichia albertii* TW07627; ZP\_03282954.1: *Enterobacter cancerogenus* ATCC 35316; YP\_001452718.1: *Citrobacter koseri* ATCC BAA-895; YP\_001570142.1: *Salmonella enterica* subsp. *arizonae* serovar 62:z4,z23; NP\_460803.1: *Salmonella typhimurium* LT2; YP\_150310.1: *Salmonella enterica* subsp. *enterica* serovar *Paratyphi A* str. ATCC 9150; YP\_002141797.1: *Salmonella enterica* subsp. *enterica* serovar *Paratyphi A* str. AKU\_12601; YP\_002243298.1: *Salmonella enterica* subsp. *enterica* serovar *Enteritidis* str. P125109; NP\_456352.1: *Salmonella enterica* subsp. *enterica* serovar *Typhi* str. CT18; NP\_804849.1: *Salmonella enterica* subsp. *enterica* serovar *Typhi* str. Ty2; YP\_001587603.1: *Salmonella enterica* subsp. *enterica* serovar *Paratyphi B* str. SPB7; ZP\_02666379.2: *Salmonella enterica* subsp. *enterica* serovar *Heidelberg* str. SL486; ZP\_02832604.2: *Salmonella enterica* subsp. *enterica* serovar *Weltevreden* str. HI\_N05-537; YP\_001177122.1: *Enterobacter* sp. 638; YP\_002226291.1: *Salmonella enterica* subsp. *enterica* serovar *Gallinarum* str. 287/91; YP\_216830.1: *Salmonella enterica* subsp. *enterica* serovar *Choleraesuis* str. SC-B67; NP\_754135.1: *Escherichia coli* CFT073; ZP\_02347214.1: *Salmonella enterica* subsp. *enterica* serovar *Saintpaul* str. SARA29; ZP\_02574893.1: *Salmonella enterica* subsp. *enterica* serovar 4,- str. CVM23701; ZP\_02659310.1: *Salmonella enterica* subsp. *enterica* serovar *Kentucky* str. CDC 191; ZP\_02663512.1: *Salmonella enterica* subsp. *enterica* serovar *Schwarzengrund* str. SL480; ZP\_02681881.1: *Salmonella enterica* subsp. *enterica* serovar *Hadar* str. RI\_05P066; ZP\_02696584.1: *Salmonella enterica* subsp. *enterica* serovar *Newport* str. SL317; YP\_002041101.1: *Salmonella enterica* subsp. *enterica* serovar *Newport* str. SL254; YP\_002045892.1: *Salmonella enterica* subsp. *enterica* serovar *Heidelberg* str. SL476; ZP\_03075263.1: *Salmonella enterica* subsp. *enterica* serovar *Kentucky* str. CVM29188; YP\_002114879.1: *Salmonella enterica* subsp. *enterica* serovar *Schwarzengrund* str. CVM19633; YP\_002146178.1: *Salmonella enterica* subsp. *enterica* serovar *Agona* str. SL483; ZP\_03165709.1: *Salmonella enterica* subsp. *enterica* serovar *Saintpaul* str. SARA23; YP\_002215294.1: *Salmonella enterica* subsp. *enterica* serovar *Dublin* str. CT\_02021853; ZP\_03221812.1: *Salmonella enterica* subsp. *enterica* serovar *Javiana* str. GA\_MM04042433; ZP\_03342093.1: *Salmonella enterica* subsp. *enterica* serovar *Typhi* str. 404ty; ZP\_03347154.1: *Salmonella enterica* subsp. *enterica* serovar *Typhi* str. E00-7866; ZP\_03352578.1: *Salmonella enterica* subsp. *enterica* serovar *Typhi* str. E01-6750; ZP\_03357060.1: *Salmonella enterica* subsp. *enterica* serovar *Typhi* str. E02-1180; ZP\_03371453.1: *Salmonella enterica* subsp. *enterica* serovar *Typhi* str. E98-2068; ZP\_03379701.1: *Salmonella enterica* subsp. *enterica* serovar *Typhi* str. J185; ZP\_03383790.1: *Salmonella enterica* subsp. *enterica* serovar *Typhi* str. M223; ZP\_03412299.1: *Salmonella enterica* subsp. *enterica* serovar *Typhi* str. E98-3139; ZP\_03217260.1: *Salmonella enterica* subsp. *enterica* serovar *Virchow* str. SL491; YP\_002237781.1: *Klebsiella pneumoniae* 342; YP\_001336004.1: *Klebsiella pneumoniae* subsp. *pneumoniae* MGH 78578; YP\_001437512.1: *Enterobacter sakazakii* ATCC BAA-894; ZP\_03403067.1: *Salmonella enterica* subsp. *enterica* serovar *Typhi* str. AG3; YP\_001907453.1: *Erwinia tasmaniensis* Et1/99; YP\_001006127.1: *Yersinia enterocolitica* subsp. *enterocolitica* 8081; NP\_669181.1: *Yersinia pestis* KIM; NP\_993079.1: *Yersinia pestis* biovar *Microtus* str. 91001; YP\_070893.1: *Yersinia pseudotuberculosis* IP 32953; YP\_651729.1: *Yersinia pestis* Antiqua; YP\_647856.1: *Yersinia pestis* Nepal516; YP\_001163103.1: *Yersinia pestis* Pestoides F; ZP\_01888376.1: *Yersinia pestis* CA88-4125; YP\_001400647.1: *Yersinia pseudotuberculosis* IP 31758; YP\_001607069.1: *Yersinia pestis* Angola; ZP\_02221459.1: *Yersinia pestis*

## Supplemental data

biovar Orientalis str. F1991016; ZP\_02227087.1: *Yersinia pestis* biovar Orientalis str. IP275; ZP\_02229339.1: *Yersinia pestis* biovar Antiqua str. E1979001; ZP\_02237158.1: *Yersinia pestis* biovar Antiqua str. B42003004; ZP\_02307206.1: *Yersinia pestis* biovar Antiqua str. UG05-0454; ZP\_02314388.1: *Yersinia pestis* biovar Orientalis str. MG05-1020; ZP\_02318544.1: *Yersinia pestis* biovar Mediaevalis str. K1973002; YP\_001720525.1: *Yersinia pseudotuberculosis* YPIII; YP\_001872871.1: *Yersinia pseudotuberculosis* PB1/+; YP\_002346706.1: *Yersinia pestis* CO92; YP\_001478346.1: *Serratia proteamaculans* 568; YP\_454994.1: *Sodalis glossinidius* str. 'morsitans'; YP\_001217052.1: *Vibrio cholerae* O395; YP\_002150764.1: *Proteus mirabilis* HI4320; YP\_856816.1: *Aeromonas hydrophila* subsp. *hydrophila* ATCC 7966; YP\_001093925.1: *Shewanella loihica* PV-4; YP\_269525.1: *Colwellia psychrerythraea* 34H; NP\_718189.1: *Shewanella oneidensis* MR-1; YP\_001366642.1: *Shewanella baltica* OS185; YP\_001554990.1: *Shewanella baltica* OS195; YP\_737796.1: *Shewanella* sp. MR-7; YP\_869415.1: *Shewanella* sp. ANA-3; NP\_797987.1: *Vibrio parahaemolyticus* RIMD 2210633; YP\_001501790.1: *Shewanella pealeana* ATCC 700345; YP\_927460.1: *Shewanella amazonensis* SB2B; YP\_001474222.1: *Shewanella sediminis* HAW-EB3; YP\_963195.1: *Shewanella* sp. W3-18-1; YP\_001183724.1: *Shewanella putrefaciens* CN-32; YP\_733804.1: *Shewanella* sp. MR-4; YP\_001050811.1: *Shewanella baltica* OS155; YP\_750914.1: *Shewanella frigidimarina* NCIMB 400; YP\_002126297.1: *Alteromonas macleodii* 'Deep ecotype'; YP\_130129.1: *Photobacterium profundum* SS9; YP\_001445537.1: *Vibrio harveyi* ATCC BAA-1116; YP\_661562.1: *Pseudoalteromonas atlantica* T6c; YP\_001674584.1: *Shewanella halifaxensis* HAW-EB4; YP\_002417027.1: *Vibrio splendidus* LGP32; NP\_934438.1: *Vibrio vulnificus* YJ016; NP\_761466.1: *Vibrio vulnificus* CMCP6; YP\_001760510.1: *Shewanella woodyi* ATCC 51908; YP\_002312133.1: *Shewanella piezotolerans* WP3; YP\_562727.1: *Shewanella denitrificans* OS217; NP\_693123.1: *Oceanobacillus ihyensensis* HTE831; YP\_001699747.1: *Lysinibacillus sphaericus* C3-41; YP\_001343242.1: *Marinomonas* sp. MWYL1; YP\_001141806.1: *Aeromonas salmonicida* subsp. *salmonicida* A449; YP\_204661.1: *Vibrio fischeri* ES114; YP\_301135.1: *Staphylococcus saprophyticus* subsp. *saprophyticus* ATCC 15305; YP\_002156075.1: *Vibrio fischeri* MJ11; NP\_244074.1: *Bacillus halodurans* C-125; YP\_001559126.1: *Clostridium phytofermentans* ISDg; YP\_080250.1: *Bacillus licheniformis* ATCC 14580; YP\_253122.1: *Staphylococcus haemolyticus* JCSC1435; YP\_261333.1: *Pseudomonas fluorescens* Pf-5; YP\_001187407.1: *Pseudomonas mendocina* ymp; YP\_001422246.1: *Bacillus amyloliquefaciens* FZB42; YP\_001748360.1: *Pseudomonas putida* W619; YP\_155660.1: *Idiomarina loihiensis* L2TR; NP\_744032.1: *Pseudomonas putida* KT2440; YP\_001269146.1: *Pseudomonas putida* F1; YP\_236680.1: *Pseudomonas syringae* pv. *syringae* B728a; YP\_001667695.1: *Pseudomonas putida* GB-1; YP\_188854.1: *Staphylococcus epidermidis* RP62A; YP\_002275225.1: *Gluconacetobacter diazotrophicus* PAI 5; YP\_804779.1: *Pediococcus pentosaceus* ATCC 25745; NP\_470973.1: *Listeria innocua* Clip11262; YP\_607257.1: *Pseudomonas entomophila* L48; YP\_001860169.1: *Burkholderia phymatum* STM815; NP\_465120.1: *Listeria monocytogenes* EGD-e; NP\_372242.1: *Staphylococcus aureus* subsp. *aureus* Mu50; NP\_374828.1: *Staphylococcus aureus* subsp. *aureus* N315; YP\_001247140.1: *Staphylococcus aureus* subsp. *aureus* JH9; YP\_001316940.1: *Staphylococcus aureus* subsp. *aureus* JH1; YP\_001442294.1: *Staphylococcus aureus* subsp. *aureus* Mu3; YP\_002314836.1: *Anoxybacillus flavithermus* WK1; YP\_001814701.1: *Exiguobacterium sibiricum* 255-15; NP\_646478.1: *Staphylococcus aureus* subsp. *aureus* MW2; YP\_043764.1: *Staphylococcus aureus* subsp. *aureus* MSSA476; YP\_186602.1: *Staphylococcus aureus* subsp. *aureus* COL; YP\_494359.1: *Staphylococcus aureus* subsp. *aureus* USA300; YP\_500333.1: *Staphylococcus aureus* subsp. *aureus* NCTC 8325; YP\_001332646.1: *Staphylococcus aureus* subsp. *aureus* str. Newman; YP\_001575592.1: *Staphylococcus aureus* subsp. *aureus* USA300\_TCH1516; ZP\_02759966.1: *Staphylococcus aureus* subsp. *aureus* USA300\_TCH1516; YP\_001487827.1: *Bacillus pumilus* SAFR-032; YP\_417047.1: *Staphylococcus aureus* RF122; YP\_041183.1: *Staphylococcus aureus* subsp. *aureus* MRSA252; YP\_176251.1: *Bacillus clausii* KSM-K16; YP\_002349929.1: *Listeria monocytogenes* HCC23; YP\_001376537.1: *Bacillus cereus* subsp. *cytotoxis* NVH 391-98; YP\_784647.1: *Bordetella avium* 197N; YP\_557760.1: *Burkholderia xenovorans* LB400; YP\_275769.1: *Pseudomonas syringae* pv. *phaseolicola* 1448A; YP\_001118914.1: *Burkholderia vietnamiensis* G4; YP\_001782545.1: *Clostridium botulinum* B1 str. Okra; NP\_882192.1: *Bordetella pertussis* Tohama I; YP\_001894915.1: *Burkholderia phytofirmans* PsJN; YP\_001647268.1: *Bacillus weihenstephanensis* KBAB4; NP\_882465.1: *Bordetella parapertussis* 12822; YP\_002448219.1: *Bacillus cereus* G9842; NP\_834359.1: *Bacillus cereus* ATCC 14579; YP\_002369448.1:

## Supplemental data

Bacillus cereus B4264; YP\_191278.1: Gluconobacter oxydans 621H; NP\_886654.1: Bordetella bronchiseptica RB50; NP\_847103.1: Bacillus anthracis str. Ames; YP\_030799.1: Bacillus anthracis str. Sterne; NP\_981083.1: Bacillus cereus ATCC 10987; YP\_038702.1: Bacillus thuringiensis serovar konkukian str. 97-27; YP\_002340711.1: Bacillus cereus AH187; YP\_085975.1: Bacillus cereus E33L; YP\_002453717.1: Bacillus cereus AH820; YP\_772921.1: Burkholderia ambifaria AMMD; YP\_001843726.1: Lactobacillus fermentum IFO 3956; YP\_942902.1: Psychromonas ingrahamii 37; YP\_121651.1: Nocardia farcinica IFM 10152; YP\_001633478.1: Bordetella petrii DSM 12804; YP\_001392189.1: Clostridium botulinum F str. Langeland; YP\_795394.1: Lactobacillus brevis ATCC 367; YP\_002284153.1: Rhizobium leguminosarum bv. trifolii WSM2304; YP\_001255404.1: Clostridium botulinum A str. ATCC 3502; YP\_001385170.1: Clostridium botulinum A str. ATCC 19397; YP\_001388639.1: Clostridium botulinum A str. Hall; YP\_001347703.1: Pseudomonas aeruginosa PA7; NP\_103622.1: Mesorhizobium loti MAFF303099; YP\_001807739.1: Burkholderia ambifaria MC40-6; YP\_001580337.1: Burkholderia multivorans ATCC 17616; YP\_002230176.1: Burkholderia cenocepacia J2315; NP\_251512.1: Pseudomonas aeruginosa PAO1; YP\_459505.1: Erythrobacter litoralis HTCC2594; YP\_790351.1: Pseudomonas aeruginosa UCBPP-PA14; YP\_002439846.1: Pseudomonas aeruginosa LESB58; YP\_001970489.1: Stenotrophomonas maltophilia K279a; YP\_617023.1: Sphingopyxis alaskensis RB2256; YP\_620554.1: Burkholderia cenocepacia AU 1054; YP\_834795.1: Burkholderia cenocepacia HI2424; YP\_148653.1: Geobacillus kaustophilus HTA426; YP\_442277.1: Burkholderia thailandensis E264; YP\_334263.1: Burkholderia pseudomallei 1710b; YP\_001067073.1: Burkholderia pseudomallei 1106a; YP\_368503.1: Burkholderia sp. 383; YP\_109010.1: Burkholderia pseudomallei K96243; YP\_993758.1: Burkholderia mallei SAVP1; YP\_001028775.1: Burkholderia mallei NCTC 10229; YP\_002026852.1: Stenotrophomonas maltophilia R551-3; YP\_001764423.1: Burkholderia cenocepacia MC0-3; NP\_970249.1: Bdellovibrio bacteriovorus HD100; YP\_001059788.1: Burkholderia pseudomallei 668; YP\_001081316.1: Burkholderia mallei NCTC 10247; YP\_001875000.1: Elusimicrobium minutum Pei191; YP\_278248.1: Mycoplasma synoviae 53; YP\_001309672.1: Clostridium beijerinckii NCIMB 8052; YP\_001576818.1: Lactobacillus helveticus DPC 4571; YP\_193206.1: Lactobacillus acidophilus NCFM; YP\_199405.1: Xanthomonas oryzae pv. oryzae KACC10331; YP\_001915608.1: Xanthomonas oryzae pv. oryzae PXO99A; YP\_002509654.1: Halothermothrix orenii H 168; YP\_757341.1: Maricaulis maris MCS10; YP\_810624.1: Oenococcus oeni PSU-1; YP\_244708.1: Xanthomonas campestris pv. campestris str. 8004; NP\_635978.1: Xanthomonas campestris pv. campestris str. ATCC 33913; XP\_505859.1: Yarrowia lipolytica; NP\_964546.1: Lactobacillus johnsonii NCC 533; YP\_001261873.1: Sphingomonas wittichii RW1; YP\_814311.1: Lactobacillus gasseri ATCC 33323; NP\_298520.1: Xylella fastidiosa 9a5c; YP\_001775202.1: Xylella fastidiosa M12; YP\_001829224.1: Xylella fastidiosa M23; NP\_778732.1: Xylella fastidiosa Temecula1; NP\_246070.1: Pasteurella multocida subsp. multocida str. Pm70; YP\_001997158.1: Chloroherpeton thalassium ATCC 35110; XP\_645637.1: Dictyostelium discoideum AX4; XP\_456263.1: Kluyveromyces lactis; YP\_001300883.1: Bacteroides vulgatus ATCC 8482; YP\_812434.1: Lactobacillus delbrueckii subsp. bulgaricus ATCC BAA-365; NP\_814796.1: Enterococcus faecalis V583; NP\_358362.1: Streptococcus pneumoniae R6; YP\_816246.1: Streptococcus pneumoniae D39; YP\_001694316.1: Streptococcus pneumoniae Hungary19A-6; YP\_001835526.1: Streptococcus pneumoniae CGSP14; YP\_002037500.1: Streptococcus pneumoniae G54; NP\_345351.1: Streptococcus pneumoniae TIGR4; XP\_001385863.2: Pichia stipitis CBS 6054; NP\_985662.1: Ashbya gossypii ATCC 10895; YP\_759928.1: Hyphomonas neptunium ATCC 15444; YP\_002123053.1: Streptococcus equi subsp. zooepidemicus MGCS10565; YP\_002131343.1: Phenylbacterium zucineum HLK1; XP\_001683506.1: Leishmania major strain Friedlin; NP\_012854.1: Saccharomyces cerevisiae; XP\_460154.1: Debaryomyces hansenii CBS767; XP\_001801028.1: Phaeosphaeria nodorum SN15; YP\_001201197.1: Streptococcus suis 98HAH33; XP\_001484046.1: Pichia guilliermondii ATCC 6260; NP\_274882.1: Neisseria meningitidis MC58; YP\_001302571.1: Parabacteroides distasonis ATCC 8503; YP\_002000650.1: Neisseria gonorrhoeae NCCP11945; YP\_001682978.1: Caulobacter sp. K31; YP\_002342048.1: Neisseria meningitidis Z2491; YP\_207199.1: Neisseria gonorrhoeae FA 1090; XP\_844799.1: Trypanosoma brucei TREU927; YP\_001598496.1: Neisseria meningitidis 053442; YP\_974447.1: Neisseria meningitidis FAM18; XP\_001465858.1: Leishmania infantum JPCM5; YP\_001280815.1: Psychrobacter sp. PRwf-1; NP\_664843.1: Streptococcus pyogenes MGAS315; NP\_802083.1: Streptococcus pyogenes SSI-1;

## Supplemental data

YP\_280574.1: *Streptococcus pyogenes* MGAS6180; YP\_001128311.1: *Streptococcus pyogenes* str. Manfredo; YP\_002286076.1: *Streptococcus pyogenes* NZ131; XP\_390238.1: *Gibberella zeae* PH-1; XP\_001565241.1: *Leishmania braziliensis* MHOM/BR/75/M2904; YP\_596891.1: *Streptococcus pyogenes* MGAS9429; YP\_600772.1: *Streptococcus pyogenes* MGAS2096; YP\_001351938.1: *Janthinobacterium* sp. Marseille; XP\_001910908.1: *Podospira anserina* DSM 980; XP\_446236.1: *Candida glabrata* CBS 138; NP\_607473.1: *Streptococcus pyogenes* MGAS8232; YP\_060405.1: *Streptococcus pyogenes* MGAS10394; YP\_602707.1: *Streptococcus pyogenes* MGAS10750; NP\_269471.1: *Streptococcus pyogenes* M1 GAS; YP\_282476.1: *Streptococcus pyogenes* MGAS5005; YP\_598792.1: *Streptococcus pyogenes* MGAS10270; YP\_099090.1: *Bacteroides fragilis* YCH46; NP\_421082.1: *Caulobacter crescentus* CB15; YP\_001034962.1: *Streptococcus sanguinis* SK36; YP\_211509.1: *Bacteroides fragilis* NCTC 9343; XP\_001940256.1: *Pyrenophora tritici-repentis* Pt-1C-BFP; YP\_001450196.1: *Streptococcus gordonii* str. Challis substr. CH1; XP\_680937.1: *Aspergillus nidulans* FGSC A4; XP\_001265696.1: *Neosartorya fischeri* NRRL 181; XP\_367405.1: *Magnaporthe grisea* 70-15; YP\_001033719.1: *Lactococcus lactis* subsp. *cremoris* MG1363; YP\_812051.1: *Lactococcus lactis* subsp. *cremoris* SK11; NP\_810723.1: *Bacteroides thetaiotaomicron* VPI-5482; YP\_141537.1: *Streptococcus thermophilus* CNRZ1066; NP\_721920.1: *Streptococcus mutans* UA159; YP\_820528.1: *Streptococcus thermophilus* LMD-9; XP\_001246405.1: *Coccidioides immitis* RS; YP\_612063.1: *Silicibacter* sp. TM1040; YP\_001727726.1: *Leuconostoc citreum* KM20; YP\_444835.1: *Salinibacter ruber* DSM 13855; NP\_943356.1: *Klebsiella pneumoniae*; YP\_631535.1: *Myxococcus xanthus* DK 1622; YP\_809822.1: *Oenococcus oeni* PSU-1; NP\_687842.1: *Streptococcus agalactiae* 2603V/R; YP\_329573.1: *Streptococcus agalactiae* A909; XP\_001692446.1: *Chlamydomonas reinhardtii*; YP\_511991.1: *Jannaschia* sp. CCS1; XP\_719233.1: *Candida albicans* SC5314; NP\_735295.1: *Streptococcus agalactiae* NEM316; YP\_168601.1: *Silicibacter pomeroyi* DSS-3; YP\_001169098.1: *Rhodobacter sphaeroides* ATCC 17025; XP\_001216799.1: *Aspergillus terreus* NIH2624; YP\_437091.1: *Hahella chejuensis* KCTC 2396; XP\_001390389.1: *Aspergillus niger* CBS 513.88; XP\_001550500.1: *Botryotinia fuckeliana* B05.10; XP\_001273080.1: *Aspergillus clavatus* NRRL 1; YP\_001042044.1: *Rhodobacter sphaeroides* ATCC 17029; YP\_916587.1: *Paracoccus denitrificans* PD1222; XP\_961529.1: *Neurospora crassa* OR74A; YP\_351544.1: *Rhodobacter sphaeroides* 2.4.1; XP\_001588803.1: *Sclerotinia sclerotiorum* 1980; XP\_762195.1: *Ustilago maydis* 521; XP\_001537789.1: *Ajellomyces capsulatus* NAM1; YP\_001198994.1: *Streptococcus suis* 05ZYH33; NP\_390842.1: *Bacillus subtilis* subsp. *subtilis* str. 168.

C94/C118 signature (20 sequences, 5.6%):

NP\_288269.1: *Escherichia coli* O157:H7 EDL933; YP\_001469780.1: *Thermotoga lettingae* TMO; NP\_623333.1: *Thermoanaerobacter tengcongensis* MB4; YP\_001567589.1: *Petrogoga mobilis* SJ95; NP\_228329.1: *Thermotoga maritima* MSB8; YP\_001244004.1: *Thermotoga petrophila* RKU-1; YP\_001738457.1: *Thermotoga* sp. RQ2; YP\_591728.1: *Acidobacteria bacterium* Ellin345; YP\_001193798.1: *Flavobacterium johnsoniae* UW101; YP\_001296902.1: *Flavobacterium psychrophilum* JIP02/86; XP\_001439866.1: *Paramecium tetraurelia* strain d4-2; XP\_001438779.1: *Paramecium tetraurelia* strain d4-2; YP\_001319456.1: *Alkaliphilus metalliredigens* QYMF; XP\_001022412.1: *Tetrahymena thermophila* SB210; YP\_001306613.1: *Thermosiphon melanesiensis* BI429; YP\_002335308.1: *Thermosiphon africanus* TCF52B; NP\_394308.1: *Thermoplasma acidophilum* DSM 1728; YP\_862969.1: *Gramella forsetii* KT0803; YP\_023758.1: *Picrophilus torridus* DSM 9790; NP\_111339.1: *Thermoplasma volcanium* GSS1; YP\_001380982.1: *Anaeromyxobacter* sp. Fw109-5.

C84/C118 signature (5 sequences, 1.4%):

YP\_806472.1: *Lactobacillus casei* ATCC 334; YP\_001987415.1: *Lactobacillus casei* BL23; NP\_785802.1: *Lactobacillus plantarum* WCFS1; YP\_818384.1: *Leuconostoc mesenteroides* subsp. *mesenteroides* ATCC 8293; YP\_001621174.1: *Acholeplasma laidlawii* PG-8A
